# Supplementary material
Source: PubMed Central journal article supplement (PMC3431018)

## Supporting Information

for

### A New Oxyma Derivative for Non-racemizable Amide-forming Reactions in Water

Qinghui Wang, Yong Wang, and Michio Kurosu\*

Department of Pharmaceutical Sciences, College of Pharmacy, University of Tennessee Health Science

Center, 881 Madison, Memphis, TN 38163-0001, United States

[mkurosu@uthsc.edu](mailto:mkurosu@uthsc.edu)

#### Table of Contents

|                                        |         |
|----------------------------------------|---------|
| General -----                          | S2      |
| Experimental procedure -----           | S3-S14  |
| NMR spectra-----                       | S16-S74 |
| Racemic analyses <i>via</i> HPLC ----- | S75-S85 |

## General

All reactions were carried out using oven-dried glassware, assembled hot and cooled under a stream of nitrogen before use. Reactions with air sensitive materials were carried out by standard syringe techniques. Commercially available reagents were used as received without further purification. Analytical thin-layer chromatography was performed with 0.25 mm coated commercial silica gel plates (EMD, Silica Gel 60F<sub>254</sub>) visualizing at 254 nm or being stained with Ninhydrin and heated at 120 degree. Infrared spectra were recorded as solutions in CDCl<sub>3</sub> using CaF<sub>2</sub> cells or as solids in Nujol using KBr cells, on a Perkin-Elmer FT 1600. <sup>1</sup>HNMR spectral data were obtained using 400, and 500 MHz instruments. <sup>13</sup>CNMR spectral data were obtained using a 100, 125 MHz spectrometer. For all NMR spectra,  $\delta$  values are given in ppm and *J* values in Hz. HPLC data were obtained on a Shimadzu prominence HPLC using Phenomenex Kinetex 2.6  $\mu$  C18 column (100 \* 4.6 mm) and monitoring at 254, 280 nm. Z in the name of compounds refers to Cbz.

## Experimental Procedures

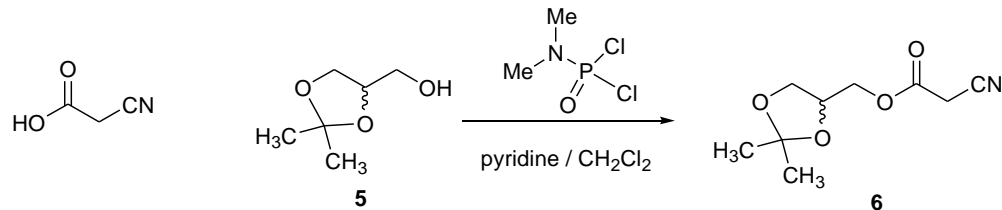

### Cyano-acetic acid 2,2-dimethyl-[1,3]dioxolan-4-ylmethyl ester (**6**)

To a solution of cyanoacetic acid (0.6 g, 7.05 mmol) in anhydrous  $\text{CH}_2\text{Cl}_2$  (80 ml) at 0 °C was added sequentially pyridine (1.71 ml, 21.15 mmol), N,N-dimethyl phosphoramidichloridate (1.68 ml, 14.10 mmol), and compound **5** (0.87 ml, 7.05 mmol). The resulting solution was stirred at room temperature under a  $\text{N}_2$  atmosphere for 24 hours, and then the solution was poured into ice-cold 1 N HCl (100 ml) and extracted with  $\text{CH}_2\text{Cl}_2$  four times. The combined organic layers were washed with brine and then dried over  $\text{Na}_2\text{SO}_4$ . Solvent was removed *in vacuo*. The resulting crude product was purified by column chromatography on silica gel (hexanes : ethyl acetate = 10: 1 to 5:1) to provide **6** as a colorless oil (1.26 g, 95% yield). TLC (Hexane:EtOAc=3:1):  $R_f = 0.35$ ; IR ( $\text{CDCl}_3$ )  $\nu_{\text{max}} = 2987, 2936, 1750, 1187, 1053, 837 \text{ cm}^{-1}$ ;  $^1\text{H NMR}$  ( $\text{CDCl}_3$ , 400 MHz)  $\delta$  4.38-4.51 (m, 3H), 4.14-4.20 (m, 1H), 3.88-3.91 (m, 1H), 1.49 (s, 3H), 1.42 (s, 3H);  $^{13}\text{C NMR}$  ( $\text{CDCl}_3$ , 125 MHz)  $\delta$  158.3, 126.3, 110.6, 107.4, 73.1, 66.8, 65.9, 26.5, 25.2; HRMS (ESI) Calcd. for  $\text{C}_9\text{H}_{14}\text{NO}_4$   $[\text{M}+\text{H}]^+$ : 200.0923, found: 200.0926.

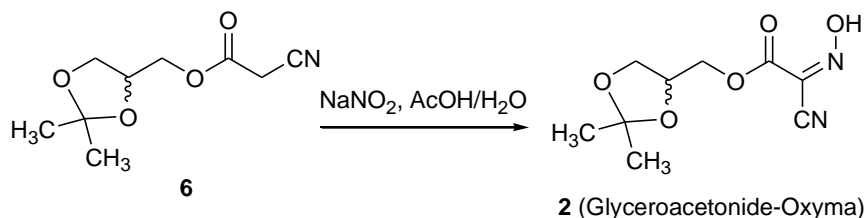

### Cyano-hydroxyimino-acetic acid 2,2-dimethyl-[1,3]dioxolan-4-ylmethyl ester (**2**)

To a suspension of **6** (10.0 g, 53.2 mmol) and sodium nitrite (4.41g, 63.85 mmol) in water (8 mL), acetic acid (7 g, 116.6 mmol) was added at 0-5°C over a period of 10 minutes. Temperature was slowly raised to 23-27°C and the reaction mixture was stirred for one hour at that temperature. After the complete consumption of **6** (monitored by TLC), the reaction mixture was extracted with ethyl acetate (5 × 15 mL). The combined organic layers were successively neutralized with saturated sodium bicarbonate to pH = 7.0 and then washed with brine, dried over  $\text{Na}_2\text{SO}_4$  and filtered through celite. Solvent was removed with evaporator *in vacuo* to provide **2** as yellow oil (11.52 g, 95%). TLC (Hexane:EtOAc=3:1):  $R_f = 0.25$ ; IR ( $\text{CDCl}_3$ )  $\nu_{\text{max}} = 2989, 1736, 1053, 839, 763 \text{ cm}^{-1}$ ;  $^1\text{H NMR}$  ( $\text{CDCl}_3$ , 400 MHz)  $\delta$  4.20-4.25 (m, 1H), 4.13-4.17 (m, 1H), 4.05-4.09 (m, 1H), 3.95-3.99 (m, 1H), 3.63-3.66 (m, 1H), 3.48 (s, 2H), 1.30 (s, 3H), 1.23 (s, 3H);  $^{13}\text{C NMR}$  ( $\text{CDCl}_3$ , 125 MHz)  $\delta$  163.2, 113.2, 109.9, 73.0, 66.5, 65.8, 26.5, 25.2, 24.5; HRMS (ESI) Calcd. for  $\text{C}_9\text{H}_{13}\text{N}_2\text{O}_5$   $[\text{M}+\text{H}]^+$ : 229.0824, found: 229.0822.

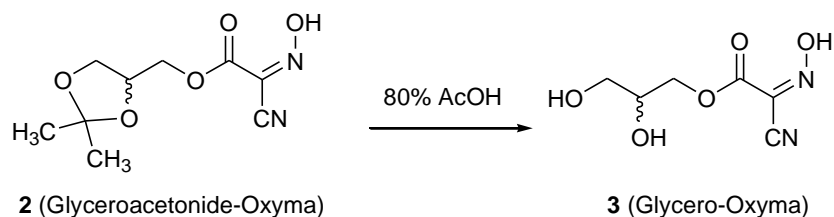

### Cyano-hydroxyimino-acetic acid 2,3-dihydroxy-propyl ester (**3**)

AcOH (80%, 2ml) was added to compound **2** (114 mg, 0.5 mmol) in a round bottom flask. The resulting solution was stirred for 30 minutes. All volatiles were removed *in vacuo*, the crude product was portioned between H<sub>2</sub>O (2 ml) and EtOAc (5 ml). Wash the aqueous layer with EtOAc (5 mL), and the combined organic layers were washed with brine, dried over Na<sub>2</sub>SO<sub>4</sub>. Concentration of the dry solution gave **3** as yellow oil (92 mg, 97%). TLC (CHCl<sub>3</sub>:MeOH=1:2): R<sub>f</sub> = 0.5; IR (CHCl<sub>3</sub>) ν<sub>max</sub> = 3343, 1734, 1305, 1063, 763 cm<sup>-1</sup>; <sup>1</sup>H NMR (CD<sub>3</sub>OD, 400 MHz) δ 4.38-4.51 (m, 3H), 4.14-4.20 (m, 1H), 3.88-3.91 (m, 1H), 1.49 (s, 3H), 1.42 (s, 3H); <sup>13</sup>C NMR (CD<sub>3</sub>OD, 125 MHz) δ 158.9, 125.8, 110.0, 107.8, 69.4, 67.2, 62.4; HRMS (ESI) Calcd. for C<sub>6</sub>H<sub>8</sub>N<sub>2</sub>O<sub>5</sub> [M+H]<sup>+</sup>: 189.0511, found: 189.0516.

#### Method A

To a stirred solution of N-protected α-amino acid (1.5 eq) and C-protected α-amino acid (1.0 eq) in H<sub>2</sub>O (0.2 M) were added sequentially **2** (1.2 eq), EDCI (1.2 eq), and NaHCO<sub>3</sub> (3.0 eq) at rt. After the times indicated in **Table 2**, 1 N HCl (2.0 ml for 0.1 mmol C-protected α-amino acid) was added. The solution was extracted with EtOAc (2 × 5 ml for 0.1 mmol C-protected α-amino acid). The combined organic layers were washed with sat. NaHCO<sub>3</sub> (2 × 5 ml), H<sub>2</sub>O (3 ml), and finally brine (3 ml), and then dried over Na<sub>2</sub>SO<sub>4</sub>. Concentration of the dry solution gave crude product with high purity.

#### Method B

To a stirred solution of N-protected α-amino acid (1.5 eq) and C-protected α-amino acid (1.0 eq) in DMF/H<sub>2</sub>O (1:2, 0.2 M) were added sequentially **2** (1.2 eq), EDCI (1.2 eq), and NaHCO<sub>3</sub> (3.0 eq) at room temperature. After the times indicated in **Table 2**, 1 N HCl (2.0 ml for 0.1 mmol C-protected α-amino acid) was added. The solution was extracted with EtOAc (2 × 5 ml for 0.1 mmol C-protected α-amino acid). The combined organic layers were washed with sat. NaHCO<sub>3</sub> (2 × 5 ml), H<sub>2</sub>O (3 ml), and finally brine (3 ml), and then dried over Na<sub>2</sub>SO<sub>4</sub>. Concentration of the dry solution gave crude product with high purity.

#### Method C

To a stirred solution of N-protected α-amino acid (1.5 eq) and C-protected α-amino acid (1.0 eq) in H<sub>2</sub>O (0.2 M) were added sequentially Octyltrimethyl ammonium bromide (2 eq), **2** (1.2 eq), EDCI (1.2 eq), and NaHCO<sub>3</sub> (3.0 eq) at room temperature. After the times indicated in **Table 2**, 1 N HCl (2.0 ml for 0.1 mmol C-protected α-amino acid) was added. The solution was extracted with EtOAc (2 × 5 ml for 0.1 mmol C-protected α-amino acid). The combined organic layers were washed with sat. NaHCO<sub>3</sub> (2 × 5 ml), H<sub>2</sub>O (3 ml), and finally brine (3 ml), and then dried over Na<sub>2</sub>SO<sub>4</sub>. Concentration of the dry solution gave crude product with high purity.

Syntheses of di- and tri-peptides using EDCI, glyceracetone-Oxyme **2**, and NaHCO<sub>3</sub> in water-based solvent system.<sup>a</sup>

| entry | <i>N</i> -protected<br>$\alpha$ -amino acid | <i>C</i> -protected<br>$\alpha$ -amino acid | conditions <sup>b</sup> | time<br>(h) | product                                             | yield<br>(%) | <i>de</i><br>(%) |
|-------|---------------------------------------------|---------------------------------------------|-------------------------|-------------|-----------------------------------------------------|--------------|------------------|
| 1     | Z-L-Tyr-OH                                  | HCl•H-L-Ala-OMe                             | A                       | 2           | Z-L-Tyr-L-Ala-OMe                                   | 93           | >99              |
| 2     | Boc-L-Tyr-OH                                | HCl•H-L-Ala-OMe                             | A                       | 2           | Boc-L-Tyr-L-Ala-OMe                                 | 95           | >99              |
| 3     | Boc-L-Val-OH                                | HCl•H-L-Pro-NH <sub>2</sub>                 | A                       | 2           | Boc-L-Val-L-Pro-NH <sub>2</sub>                     | 94           | >92              |
| 4     | Fmoc-L-Tyr-OH                               | HCl•H-L-Ala-OMe                             | A                       | 2           | Fmoc-L-Val-L-Pro-NH <sub>2</sub>                    | 95           | >99              |
| 5     | Fmoc-L-Val-OH                               | HCl•H-L-Pro-NH <sub>2</sub>                 | A                       | 2           | Fmoc-L-Val-L-Pro-NH <sub>2</sub>                    | 94           | >99              |
| 6     | Fmoc-L-Val-OH                               | HCl•H-L-Pro-NH <sub>2</sub>                 | A                       | 12          | Fmoc-L-Val-L-Pro-NH <sub>2</sub>                    | 98           | >99              |
| 7     | Boc-L-Lys(COCF <sub>3</sub> )-OH            | HCl•H-L-Pro-NH <sub>2</sub>                 | A                       | 2           | Boc-L-Lys(COCF <sub>3</sub> )-L-Pro-NH <sub>2</sub> | 93           | >92              |
| 8     | Boc-L-Lys(COCF <sub>3</sub> )-OH            | HCl•H-L-Ala-NH <sub>2</sub>                 | A                       | 2           | Boc-L-Lys(COCF <sub>3</sub> )-L-Ala-OMe             | 92           | >92              |
| 9     | Boc-L-Val-OH                                | HCl•H-Gly-OMe                               | A                       | 2           | Boc-L-Val-Gly-OMe                                   | 95           | >92              |
| 10    | Z-L-Phg-OH                                  | HCl•H-L-Phe-OMe                             | A                       | 4           | Z-L-Phg-L-Phe-OMe                                   | 92           | >92              |
| 11    | Z-L-Phg-OH                                  | HCl•H-L-Phe-O <sup>t</sup> Bu               | A                       | 12          | Z-L-Phg-L-Phe-O <sup>t</sup> Bu                     | 40           | >99              |
| 12    | Z-L-Phg-OH                                  | HCl•H-L-Phe-O <sup>t</sup> Bu               | B                       | 4           | Z-L-Phg-L-Phe-O <sup>t</sup> Bu                     | 90           | >99              |
| 13    | Z-L-Phg-OH                                  | HCl•H-L-Val-O <sup>t</sup> Bu               | C                       | 4           | Z-L-Phg-L-Val-O <sup>t</sup> Bu                     | 90           | >99              |
| 14    | Boc-L-Thr-OH                                | HCl•H-L-Ala-OMe                             | A                       | 2           | Boc-L-Thr-L-Ala-OMe                                 | 92           | >92              |
| 15    | Boc-L-Tyr-OH                                | HCl• <i>N</i> -Me-Gly-OMe <sup>f</sup>      | A                       | 2           | Boc-L-Tyr- <i>N</i> -Me-L-Ala-OMe                   | 90           | 98               |
| 16    | Boc-L-Tyr-OH                                | HCl• <i>N</i> -Me-L-Ala-OMe                 | A                       | 2           | Boc-L-Tyr- <i>N</i> -Me-L-Ala-OMe                   | 70           | >99              |
| 17    | Boc-L-Tyr-OH                                | HCl• <i>N</i> -Me-L-Ala-OMe                 | A                       | 6           | Boc-L-Tyr- <i>N</i> -Me-L-Ala-OMe                   | 92           | >99              |
| 18    | Boc-L-Tyr-OH                                | HCl•H-L-Pro-OMe                             | A                       | 2           | Boc-L-Tyr-L-Pro-OMe                                 | 95           | >99              |
| 19    | Ac-L-Ala-OH <sup>d</sup>                    | HCl•H-L-Ala-OMe                             | A                       | 2           | Ac-L-Ala-L-Ala-OMe                                  | 95           | >92              |
| 20    | Ac-L-Phe-OH <sup>d</sup>                    | HCl•H-L-Ala-OMe                             | A                       | 2           | Ac-L-Phe-L-Ala-OMe                                  | 93           | 98               |
| 21    | Ac-L-Tyr-OH <sup>d</sup>                    | HCl•H-L-Ala-OMe                             | A                       | 2           | Ac-L-Tyr-L-Ala-OMe                                  | 93           | >99              |
| 22    | Boc-L-Ala-D-(4-OH)Phg-OH <sup>c</sup>       | HCl•H-D-Ala-OMe                             | A                       | 2           | Boc-L-Ala-D-(4-OH)Phg-L-Ala-OMe                     | 95           | >92              |
| 23    | Boc-L-Ala-L-Phe-OH                          | HCl•H-D-Val-OMe                             | A                       | 2           | Boc-L-Ala-L-Phe-D-Val-OMe                           | 95           | >99              |
| 24    | Boc-L-Ala-L-Phe-OH                          | HCl•H-D-Ala-OMe                             | A                       | 2           | Boc-L-Ala-L-Phe-D-Ala-OMe                           | 95           | >99              |
| 25    | Boc-L-Ala-L-Phe-OH                          | HCl•H-Gly-OMe                               | A                       | 2           | Boc-L-Ala-L-Phe-Gly-OMe                             | 95           | >99              |

<sup>a</sup> *N*-protected  $\alpha$ -amino acid (1.5 equiv), *C*-protected  $\alpha$ -amino acid (1.0 equiv), **2** (1.2 equiv), EDCI (1.2 equiv), NaHCO<sub>3</sub> (3 equiv).; <sup>b</sup> A: in H<sub>2</sub>O (0.2 M), B: H<sub>2</sub>O : DMF = 2 : 1 (0.2 M); C: Octyltrimethylammonium bromide (2 equiv.) in water (0.2 M). <sup>c</sup> *de* was determined via <sup>1</sup>H-NMR analyses; <sup>d</sup> 3 equiv. of acetylated  $\alpha$ -amino acid was used; <sup>e</sup> (4-OH)Phg = 4-hydroxyphenylglycine.; <sup>f</sup> *N*-Methylglycine methyl ester hydrochloride (Sar-OMe).

### Z-L-Phg-L-Pro-NH<sub>2</sub>

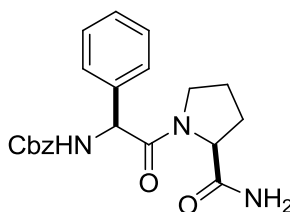

Reaction conducted according to **Method A** afforded product as an amorphous solid. TLC (EtOAc): R<sub>f</sub> = 0.3; [ $\alpha$ ]<sub>D</sub><sup>22</sup> = - 43.6 (*c* = 1.00, CHCl<sub>3</sub>); IR (CDCl<sub>3</sub>)  $\nu_{\max}$  = 3398, 3319, 2955, 2879, 1683, 1643, 1441, 1242, 732, 699 cm<sup>-1</sup>; <sup>1</sup>H NMR (CDCl<sub>3</sub>, 500 MHz)  $\delta$  7.27-7.42 (m, 10H), 6.58 (br s, 1H), 6.19 (d, *J* = 7.0 Hz, 1H), 5.49 (d, *J* = 8.0 Hz, 1H), 5.43 (br s, 1H), 5.09 (q, *J* = 12.5 Hz, 2H), 4.60 (d, *J* = 7.5 Hz, 1H), 3.59 (t, *J* = 8.0 Hz, 1H), 3.21-3.24 (m, 1H), 2.31-2.34 (m, 1H), 1.87-1.97 (m, 3H); <sup>13</sup>C NMR (CDCl<sub>3</sub>, 125 MHz)  $\delta$  172.7, 169.3, 155.6, 136.6, 136.3, 129.5, 129.3, 128.8, 128.5, 128.1, 128.1, 128.0, 127.8, 67.0, 59.9, 56.9, 47.0, 27.1, 24.8; HRMS (ESI) Calcd. for C<sub>21</sub>H<sub>24</sub>N<sub>3</sub>O<sub>4</sub> [M+H]<sup>+</sup>: 382.1767, found: 382.1769.

### Z-D-Phg-L-Pro-NH<sub>2</sub>

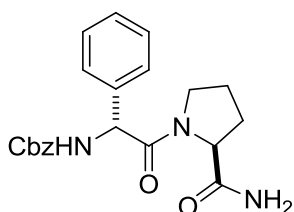

Reaction conducted according to **Method A** afforded product as an amorphous solid. TLC (EtOAc):  $R_f = 0.3$ ;  $[\alpha]_D^{22} = +43.6$  ( $c = 1.00$ ,  $\text{CHCl}_3$ ); IR ( $\text{CDCl}_3$ )  $\nu_{\text{max}} = 3316, 2956, 1677, 1647, 1497, 1434, 1056, 699\text{cm}^{-1}$ ;  $^1\text{H NMR}$  ( $\text{CDCl}_3$ , 400 MHz)  $\delta$  7.33-7.44 (m, 10H), 6.85 (br s, 1H), 6.01 (d,  $J = 6.8$  Hz, 1H), 5.44 (d,  $J = 6.8$  Hz, 1H), 5.34 (br s, 1H), 5.10 (q,  $J = 12.0$  Hz, 2H), 4.60 (d,  $J = 6.4$  Hz, 1H), 3.79 (m, 1H), 3.21 (q, 1H), 2.36 (q, 1H), 2.02-2.10 (m, 1H), 1.81-1.89 (m, 1H);  $^{13}\text{C NMR}$  ( $\text{CDCl}_3$ , 100 MHz)  $\delta$  177.1, 169.8, 155.9, 136.1, 135.4, 129.3, 129.0, 128.5, 128.2, 128.1, 128.0, 67.1, 60.3, 57.6, 46.9, 29.7, 27.9, 24.5; HRMS (ESI) Calcd. for  $\text{C}_{21}\text{H}_{24}\text{N}_3\text{O}_4$   $[\text{M}+\text{H}]^+$ : 382.1767, found: 382.1768.

### Boc-L-Val-L-Gly-OMe

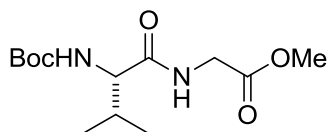

Reaction conducted according to **Method A** afforded product as an amorphous solid. TLC (Hexane : EtOAc = 1 : 1):  $R_f = 0.3$ ;  $[\alpha]_D^{22} = +216.3$  ( $c = 1.00$ ,  $\text{CHCl}_3$ ); IR ( $\text{CDCl}_3$ )  $\nu_{\text{max}} = 3318, 2967, 1750, 1687, 1657, 1523, 1210, 1167, 907, 729\text{cm}^{-1}$ ;  $^1\text{H NMR}$  ( $\text{CDCl}_3$ , 400 MHz)  $\delta$  6.61 (br s, 1H), 5.09 (d,  $J = 7.6$  Hz, 1H), 4.05 (q,  $J = 5.2$  Hz, 2H), 4.02 (t,  $J = 7.2$  Hz, 1H), 3.76 (s, 3H), 2.18 (m, 1H), 1.44 (s, 9H), 0.98 (d,  $J = 6.8$  Hz, 3H), 0.93 (d,  $J = 6.8$  Hz, 3H);  $^{13}\text{C NMR}$  ( $\text{CDCl}_3$ , 100 MHz)  $\delta$  172.0, 170.1, 155.9, 80.0, 59.8, 52.4, 41.1, 30.8, 28.3, 19.2, 17.6; HRMS (ESI) Calcd. for  $\text{C}_{13}\text{H}_{25}\text{N}_2\text{O}_5$   $[\text{M}+\text{H}]^+$ : 289.1763, found: 289.1762.

### Z-L-Phg-L-Phe-O<sup>t</sup>Bu

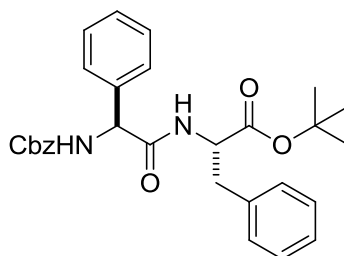

Reaction conducted according to **Method A/B** afforded product as an amorphous solid. TLC (Hexane : EtOAc = 1 : 2):  $R_f = 0.7$ ;  $[\alpha]_D^{22} = -38.3$  ( $c = 1.00$ ,  $\text{CHCl}_3$ ); IR ( $\text{CDCl}_3$ )  $\nu_{\text{max}} = 3328, 2979, 2936, 1727, 1697, 1653, 1513, 1497, 1367, 1238, 1154, 907, 731, 698\text{cm}^{-1}$ ;  $^1\text{H NMR}$  ( $\text{CDCl}_3$ , 400 MHz)  $\delta$  7.22-7.28 (m, 13H), 7.12 (d,  $J = 6.4$  Hz, 2H), 6.14 (d,  $J = 6.8$  Hz, 1H), 6.05 (br s, 1H), 5.17 (d,  $J = 5.2$  Hz, 1H), 5.09 (q,  $J = 12.4$  Hz, 1H), 4.67 (q,  $J = 6.0$  Hz, 2H), 3.04-3.14 (m, 1H), 1.32 (s, 9H);  $^{13}\text{C NMR}$  ( $\text{CDCl}_3$ , 100 MHz)  $\delta$  169.7, 169.0, 155.6, 137.6, 136.2, 135.8, 129.5, 129.1, 128.6, 128.5, 128.5, 128.2, 127.2, 127.1, 82.6, 67.1, 59.0, 54.0, 37.8, 28.0, 27.9; HRMS (ESI) Calcd. for  $\text{C}_{29}\text{H}_{33}\text{N}_2\text{O}_5$   $[\text{M}+\text{H}]^+$ : 489.2389, found: 489.2387.

### Z-D-Phg-L-Phe-O<sup>t</sup>Bu

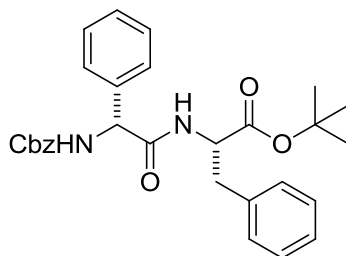

Reaction conducted according to **Method A/B** afforded product as an amorphous solid. TLC (Hexane:EtOAc=1:2):  $R_f = 0.7$ ;  $[\alpha]_D^{22} = +38.3$  ( $c = 1.00$ ,  $\text{CHCl}_3$ ); IR ( $\text{CDCl}_3$ )  $\nu_{\text{max}} = 3352, 3031, 2978, 1726, 1698, 1654, 1515, 1240, 1160, 699 \text{ cm}^{-1}$ ;  $^1\text{H NMR}$  ( $\text{CDCl}_3$ , 500 MHz)  $\delta$  7.28-7.39 (m, 10H), 7.14 (t,  $J = 7.0$  Hz, 1H), 7.06 (t,  $J = 7.0$  Hz, 2H), 6.69 (d,  $J = 4.4$  Hz, 2H), 6.20 (br s, 1H), 6.09 (d,  $J = 4.0$  Hz, 1H), 5.19 (s, 1H), 5.07 (q,  $J = 7.5$  Hz, 2H), 4.77 (q,  $J = 5.5$  Hz, 1H), 2.95 (s, 2H), 1.42 (s, 9H);  $^{13}\text{C NMR}$  ( $\text{CDCl}_3$ , 100 MHz)  $\delta$  169.9, 168.7, 155.5, 138.1, 136.2, 135.3, 129.4, 129.2, 128.6, 128.5, 128.3, 128.1, 127.3, 126.8, 82.8, 67.0, 66.9, 58.9, 53.4, 37.6, 28.0; HRMS (ESI) Calcd. for  $\text{C}_{29}\text{H}_{33}\text{N}_2\text{O}_5$   $[\text{M}+\text{H}]^+$ : 489.2389, found: 489.2388.

### Z-L-Phg-L-Val-O<sup>t</sup>Bu

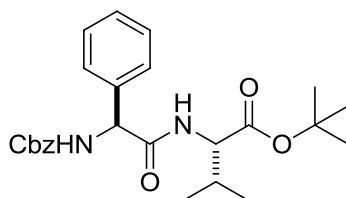

Reaction conducted according to **Method C** afforded product as an amorphous solid. TLC (Hexane:EtOAc=1:2):  $R_f = 0.8$ ;  $[\alpha]_D^{22} = +165.3$  ( $c = 1.00$ ,  $\text{CHCl}_3$ ); IR ( $\text{CDCl}_3$ )  $\nu_{\text{max}} = 3316, 2968, 2934, 2876, 1727, 1661, 1531, 1498, 1238, 1154, 1141, 732, 697 \text{ cm}^{-1}$ ;  $^1\text{H NMR}$  ( $\text{CDCl}_3$ , 400 MHz)  $\delta$  7.35-7.41 (m, 10H), 6.12 (d,  $J = 7.6$  Hz, 2H), 5.26 (d,  $J = 7.2$  Hz, 1H), 5.11 (q,  $J = 12.4$  Hz, 2H), 4.37 (q,  $J = 3.6$  Hz, 1H), 2.12-2.16 (m, 1H), 1.37 (s, 9H), 0.94 (d,  $J = 7.2$  Hz, 1H), 0.91 (d,  $J = 6.8$  Hz, 3H);  $^{13}\text{C NMR}$  ( $\text{CDCl}_3$ , 100 MHz)  $\delta$  170.0, 169.4, 155.6, 137.8, 136.2, 129.1, 128.6, 128.5, 128.1, 127.3, 67.1, 59.0, 58.0, 31.5, 27.9, 18.8, 17.8; HRMS (ESI) Calcd. for  $\text{C}_{29}\text{H}_{33}\text{N}_2\text{O}_5$   $[\text{M}+\text{H}]^+$ : 489.2389, found: 489.2388.

### Z-L-Phg-L-Val-OMe

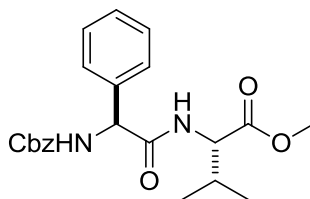

Reaction conducted according to **Method A** afforded product as an amorphous solid. TLC (Hexane:EtOAc=1:2):  $R_f = 0.6$ ;  $[\alpha]_D^{22} = +28.7$  ( $c = 1.00$ ,  $\text{CHCl}_3$ ); IR ( $\text{CDCl}_3$ )  $\nu_{\text{max}} = 3317, 2964, 1739, 1707, 1662, 1529, 1238, 1212, 697 \text{ cm}^{-1}$ ;  $^1\text{H NMR}$  ( $\text{CDCl}_3$ , 400 MHz)  $\delta$  7.29-7.37 (m, 10H), 6.13 (d,  $J = 8.4$  Hz, 1H), 6.05 (br s, 2H), 5.24 (br s, 1H), 5.08 (q,  $J = 12.4$  Hz, 2H), 4.48 (q,  $J = 4.8$  Hz, 1H), 3.62 (s, 3H), 2.12-2.16 (m, 1H), 0.91 (d,  $J = 6.8$  Hz, 3H), 0.85 (d,  $J = 6.8$  Hz, 3H);  $^{13}\text{C NMR}$  ( $\text{CDCl}_3$ , 100 MHz)  $\delta$  171.7,

169.7, 155.7, 137.5, 136.2, 129.1, 128.7, 128.5, 128.2, 128.1, 127.3, 67.1, 59.0, 57.5, 52.2, 31.3, 18.9, 17.7; HRMS (ESI) Calcd. for C<sub>22</sub>H<sub>27</sub>N<sub>2</sub>O<sub>5</sub> [M+H]<sup>+</sup>: 399.1920, found: 399.1924.

### Boc-L-Thr-L-Ala-OMe

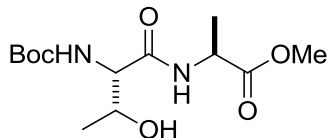

Reaction conducted according to **Method A** afforded product as an amorphous solid. TLC (Hexane:EtOAc=1:5): R<sub>f</sub> = 0.3; [α]<sub>D</sub><sup>22</sup> = + 8.6 (c = 1.00, CHCl<sub>3</sub>); IR (CDCl<sub>3</sub>) ν<sub>max</sub> = 3316, 2979, 2936, 1743, 1658, 1515, 1367, 1162, 1057 cm<sup>-1</sup>; <sup>1</sup>H NMR (CDCl<sub>3</sub>, 400 MHz) δ 7.13 (d, J = 6.8 Hz, 1H), 5.53 (d, J = 8.0 Hz, 1H), 4.51-4.58 (m, 1H), 4.31 (q, J = 1.6 Hz, 1H), 4.10 (q, J = 1.2 Hz, 1H), 3.73 (s, 3H), 3.42 (br s, 1H), 1.44 (s, 9H), 1.40 (d, J = 7.2 Hz, 3H), 1.18 (d, J = 6.4 Hz, 3H); <sup>13</sup>C NMR (CDCl<sub>3</sub>, 100 MHz) δ 173.1, 171.1, 156.4, 80.4, 67.0, 57.9, 52.6, 48.1, 28.5, 28.3, 28.1, 18.0, 18.0; HRMS (ESI) Calcd. for C<sub>13</sub>H<sub>25</sub>N<sub>2</sub>O<sub>6</sub> [M+H]<sup>+</sup>: 305.1712, found: 305.1716.

### Boc-L-Ala-L-Phe-D-Val-OMe

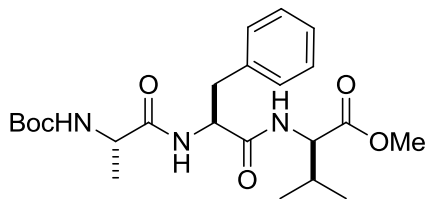

To a stirred solution of Boc-L-Ala-L-Phe-OBn (85.2 mg, 0.2 mmol) in MeOH (1.0 ml) was added 10% Pd/C, then a H<sub>2</sub> balloon was charged. The suspension was stirred for 2 hours, then filtered on celite and eluted with MeOH. The filtrate was concentrated to afford the acid, Boc-L-Ala-L-Phe-OH, as a colorless solid. Without further purification, the acid reacted with D-Val-OMe hydrochloride (50.2mg, 0.3 mmol) to provide the title compound (85.3 mg) as an amorphous solid according to **Method A**: TLC (Hexane:EtOAc=1:2): R<sub>f</sub> = 0.4; [α]<sub>D</sub><sup>22</sup> = + 2.6 (c = 1.00, CHCl<sub>3</sub>); IR (CDCl<sub>3</sub>) ν<sub>max</sub> = 3288, 2967, 2929, 1743, 1717, 1646, 1547, 1168, 699 cm<sup>-1</sup>; <sup>1</sup>H NMR (CDCl<sub>3</sub>, 400 MHz) δ 7.22-7.30 (m, 5H), 6.69 (d, J = 7.6 Hz, 1H), 6.38 (br s, 1H), 4.93 (br s, 1H), 4.66 (q, J = 7.2 Hz, 1H), 4.43 (q, J = 4.8 Hz, 1H), 4.12 (t, J = 6.8 Hz, 1H), 3.71 (s, 3H), 3.10 (d, J = 6.8 Hz, 1H), 2.06-2.16 (m, 1H), 1.43 (s, 9H), 1.28 (d, J = 7.2 Hz, 3H), 0.87 (d, J = 7.2 Hz, 3H), 0.83 (d, J = 6.8 Hz, 3H); <sup>13</sup>C NMR (CDCl<sub>3</sub>, 100 MHz) δ 172.7, 171.7, 170.5, 136.4, 129.3, 128.7, 127.1, 80.3, 57.4, 54.4, 52.1, 50.3, 37.7, 31.1, 29.7, 28.3, 18.9, 18.2, 17.8; HRMS (ESI) Calcd. for C<sub>23</sub>H<sub>36</sub>N<sub>3</sub>O<sub>6</sub> [M+H]<sup>+</sup>: 450.2604, found: 450.2601.

### Boc-L-Ala-L-Phe-D-Ala-OMe

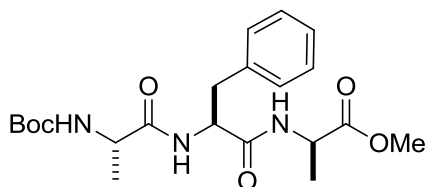

To a stirred solution of Boc-L-Ala-L-Phe-OBn (85.0 mg, 0.2 mmol) in MeOH (1.0 ml) was added 10% Pd/C under N<sub>2</sub>, then a H<sub>2</sub> balloon was charged. The suspension was stirred for 2 hours, then filtered on celite pad



and washed with MeOH. The filtrate was concentrated to afford the acid, Boc-L-Ala-L-Phe-OH, as a colorless solid. Without further purification, the acid reacted with D-Ala-OMe hydrochloride (41.7 mg, 0.3 mmol) according to **Method A** to provide the title compound (79.9 mg, 95%) as an amorphous solid. TLC (hexanes:EtOAc=1:2):  $R_f = 0.3$ ;  $[\alpha]_D^{22} = +7.2$  ( $c = 1.00$ ,  $\text{CHCl}_3$ ); IR ( $\text{CDCl}_3$ )  $\nu_{\text{max}} = 3285, 2980, 2932, 1747, 1716, 1697, 1645, 550, 1164, 733, 699 \text{ cm}^{-1}$ ;  $^1\text{H NMR}$  ( $\text{CDCl}_3, 400 \text{ MHz}$ )  $\delta$  7.22-7.29 (m, 5H), 6.63 (d,  $J = 8.0 \text{ Hz}$ , 1H), 6.59 (br s, 1H), 4.99 (br s, 1H), 4.69 (q,  $J = 6.8 \text{ Hz}$ , 1H), 4.50 (q,  $J = 7.2 \text{ Hz}$ , 1H), 4.08 (m, 1H), 3.73 (s, 3H), 3.09-3.18 (m, 1H), 1.44 (s, 9H), 1.38 (d,  $J = 7.2 \text{ Hz}$ , 3H), 1.28 (d,  $J = 7.2 \text{ Hz}$ , 3H);  $^{13}\text{C NMR}$  ( $\text{CDCl}_3, 125 \text{ MHz}$ )  $\delta$  172.7, 172.6, 170.1, 136.4, 129.4, 128.7, 127.1, 80.3, 54.1, 52.4, 48.2, 37.8, 28.3, 18.0; HRMS (ESI) Calcd. for  $\text{C}_{21}\text{H}_{32}\text{N}_3\text{O}_6$   $[\text{M}+\text{H}]^+$ : 422.2291, found: 422.2294.

### Boc-L-Tyr-L-Ala-OMe

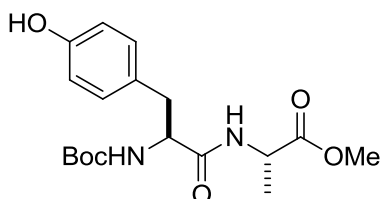

Reaction conducted according to **Method A** afforded product as an amorphous solid. TLC (Hexane:EtOAc=1:3):  $R_f = 0.3$ ;  $[\alpha]_D^{22} = +0.9$  ( $c = 1.00$ ,  $\text{CHCl}_3$ ); IR (thin film)  $\nu_{\text{max}} = \text{cm}^{-1}$ ;  $^1\text{H NMR}$  ( $\text{CDCl}_3, 400 \text{ MHz}$ )  $\delta$  7.04 (d,  $J = 8.4 \text{ Hz}$ , 2H), 6.74 (d,  $J = 8.4 \text{ Hz}$ , 2H), 6.48 (d,  $J = 7.2 \text{ Hz}$ , 1H), 6.13 (br s, 1H), 5.08 (br s, 1H), 4.51 (m, 1H), 4.30 (br s, 1H), 3.72 (s, 3H), 2.94-3.04 (m, 2H), 1.43 (s, 9H), 1.35 (d,  $J = 7.2 \text{ Hz}$ , 3H);  $^{13}\text{C NMR}$  ( $\text{CDCl}_3, 100 \text{ MHz}$ )  $\delta$  173.1, 171.2, 155.7, 155.3, 130.7, 128.2, 115.8, 80.6, 56.0, 52.7, 48.4, 37.8, 28.5, 18.6; HRMS (ESI) Calcd. for  $\text{C}_{18}\text{H}_{27}\text{N}_2\text{O}_6$   $[\text{M}+\text{H}]^+$ : 367.1869, found: 367.1874.

### Boc-L-Tyr-L-Sar-OMe

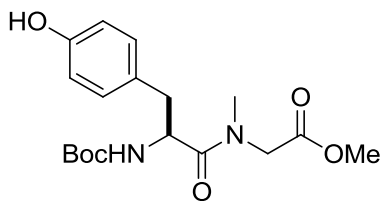

Reaction conducted according to **Method A** afforded product as an amorphous solid. TLC (Hexane:EtOAc=1:3):  $R_f = 0.3$ ;  $[\alpha]_D^{22} = +12.0$  ( $c = 1.00$ ,  $\text{CHCl}_3$ ); IR ( $\text{CDCl}_3$ )  $\nu_{\text{max}} = 3322, 2980, 1750, 1703, 1644, 1517, 1367, 1218, 1168, 828 \text{ cm}^{-1}$ ;  $^1\text{H NMR}$  ( $\text{CDCl}_3, 400 \text{ MHz}$ )  $\delta$  7.06 (d,  $J = 8.4 \text{ Hz}$ , 2H), 6.71 (d,  $J = 8.4 \text{ Hz}$ , 2H), 6.02 (br s, 1H), 5.35 (d,  $J = 8.4 \text{ Hz}$ , 2H), 4.85 (q,  $J = 6.8 \text{ Hz}$ , 1H), 3.74 (s, 3H), 2.85-3.00 (m, 1H), 2.92 (s, 1H), 1.42 (s, 9H);  $^{13}\text{C NMR}$  ( $\text{CDCl}_3, 100 \text{ MHz}$ )  $\delta$  172.7, 169.5, 155.4, 155.2, 130.9, 130.7, 127.9, 115.5, 115.5, 80.1, 52.7, 52.4, 49.8, 39.1, 38.8, 36.5, 28.5; HRMS (ESI) Calcd. for  $\text{C}_{18}\text{H}_{27}\text{N}_2\text{O}_6$   $[\text{M}+\text{H}]^+$ : 367.4166, found: 367.4169.

### Ac-L-Phe-L-Ala-OMe

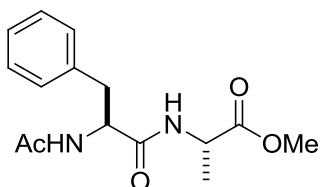

Reaction conducted according to **Method A** afforded product as an amorphous solid. TLC (Hexane:EtOAc=1:3):  $R_f = 0.3$ ;  $[\alpha]_D^{22} = +22.0$  ( $c = 1.00$ ,  $\text{CHCl}_3$ ); IR ( $\text{CDCl}_3$ )  $\nu_{\text{max}} = 3260, 3073, 2955, 1760, 1729, 1674, 1641, 1559, 730 \text{ cm}^{-1}$ ;  $^1\text{H NMR}$  ( $\text{CDCl}_3, 400 \text{ MHz}$ )  $\delta$  7.20-7.32 (m, 5H), 6.45 (d,  $J = 6.8 \text{ Hz}$ , 1H), 6.29 (d,  $J = 7.6 \text{ Hz}$ , 1H), 4.70 (q,  $J = 7.2 \text{ Hz}$ , 1H), 4.44-4.49 (m, 1H), 3.70 (s, 3H), 2.98-3.11 (m, 2H), 1.98 (s, 3H), 1.35 (d,  $J = 7.2 \text{ Hz}$ , 3H);  $^{13}\text{C NMR}$  ( $\text{CDCl}_3, 100 \text{ MHz}$ )  $\delta$  172.8, 172.7, 170.5, 170.3, 170.0, 136.6, 136.4, 129.3, 129.3, 128.7, 128.6, 127.0, 54.4, 54.3, 52.5, 48.2, 47.9, 38.7, 38.5, 23.2, 18.2, 17.9; HRMS (ESI) Calcd. for  $\text{C}_{15}\text{H}_{21}\text{N}_2\text{O}_4$   $[\text{M}+\text{H}]^+$ : 293.1501, found: 293.1504.

### Ac-L-Tyr-L-Ala-OMe

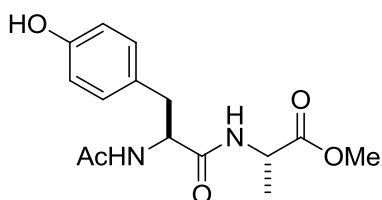

Reaction conducted according to **Method A** afforded product as an amorphous solid. TLC (Hexane:EtOAc=1:4):  $R_f = 0.3$ ;  $[\alpha]_D^{22} = +45.3$  ( $c = 1.00$ ,  $\text{CHCl}_3$ ); IR ( $\text{CDCl}_3$ )  $\nu_{\text{max}} = 3288, 3018, 2954, 2851, 1740, 1641, 1516, 1451, 1223, 754 \text{ cm}^{-1}$ ;  $^1\text{H NMR}$  ( $\text{CDCl}_3, 400 \text{ MHz}$ )  $\delta$  6.96 (dd,  $J = 1.2, 7.6 \text{ Hz}$ , 2H), 6.67 (dd,  $J = 1.2, 7.6 \text{ Hz}$ , 2H), 4.47-4.50 (m, 1H), 4.32-4.40 (m, 1H), 3.65 (s, 3H), 2.90 (dd,  $J = 6.0, 13.6 \text{ Hz}$ , 1H), 2.80 (dd,  $J = 6.0, 13.6 \text{ Hz}$ , 1H), 1.87 (s, 3H), 1.30 (d,  $J = 7.2 \text{ Hz}$ , 3H);  $^{13}\text{C NMR}$  ( $\text{CDCl}_3\text{-MeOD} = 10:1, 100 \text{ MHz}$ )  $\delta$  174.4, 172.7, 172.4, 157.0, 131.7, 128.6, 116.7, 55.8, 55.7, 53.8, 49.5, 49.3, 39.0, 38.8, 24.0, 24.0, 18.9, 18.7; HRMS (ESI) Calcd. for  $\text{C}_{15}\text{H}_{21}\text{N}_2\text{O}_5$   $[\text{M}+\text{H}]^+$ : 309.1450, found: 309.1452.

### Boc-L-Tyr-L-Pro-OMe

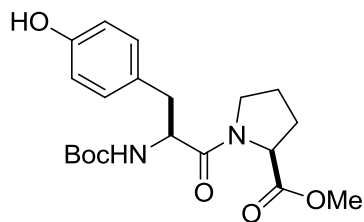

Reaction conducted according to **Method A** afforded product as an amorphous solid. TLC (Hexane:EtOAc=1:4):  $R_f = 0.35$ ;  $[\alpha]_D^{22} = +65.3$  ( $c = 1.00$ ,  $\text{CHCl}_3$ ); IR ( $\text{CDCl}_3$ )  $\nu_{\text{max}} = 3318, 2978, 2933, 2884, 1744, 1696, 1637, 1516, 1448, 1367, 1169, 732 \text{ cm}^{-1}$ ;  $^1\text{H NMR}$  ( $\text{CDCl}_3, 400 \text{ MHz}$ )  $\delta$  7.10 (d,  $J = 8.4 \text{ Hz}$ , 2H), 6.71 (d,  $J = 8.4 \text{ Hz}$ , 1H), 6.46 (s, 1H), 5.29 (d,  $J = 8.8 \text{ Hz}$ , 1H), 4.63 (q,  $J = 6.4 \text{ Hz}$ , 1H), 4.52 (dd,  $J = 4.0, 8.0 \text{ Hz}$ , 1H), 3.74 (s, 3H), 3.28-3.36 (m, 1H), 3.02 (dd,  $J = 6.4, 13.6 \text{ Hz}$ , 1H), 2.90 (dd,  $J = 6.4, 13.6 \text{ Hz}$ , 3H), 2.15-2.21 (m, 1H), 1.91-1.99 (m, 3H), 1.40 (s, 9H);  $^{13}\text{C NMR}$  ( $\text{CDCl}_3, 100 \text{ MHz}$ )  $\delta$  172.4, 170.9, 155.4, 155.2, 130.8, 127.4, 115.4, 79.9, 59.0, 53.3, 52.3, 46.9, 38.0, 29.0, 28.3, 24.9; HRMS (ESI) Calcd. for  $\text{C}_{20}\text{H}_{29}\text{N}_2\text{O}_6$   $[\text{M}+\text{H}]^+$ : 393.2025, found: 393.2022.

### Boc-L-Ala-L-Phe-Gly-OMe

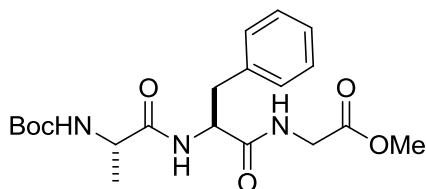

To a stirred solution of Boc-L-Ala-L-Phe-OBn (85.3 mg, 0.2 mmol) in MeOH (1.0 ml) was added 10% Pd/C, then a H<sub>2</sub> balloon was charged. The suspension was stirred for 2 hours, then filtered on celite and eluted with MeOH. The filtrate was concentrated to afford the acid, Boc-L-Ala-L-Phe-OH, as a colorless solid. Without further purification, the acid reacted with D-Gly-OMe hydrochloride (37.5 mg, 0.3 mmol) to provide the title compound according to **Method A** to afford product (77.6 mg) as an amorphous solid. TLC (Hexane:EtOAc=1:2): R<sub>f</sub> = 0.25; [α]<sup>22</sup><sub>D</sub> = (c =, CHCl<sub>3</sub>); IR (thin film) ν<sub>max</sub> = cm<sup>-1</sup>; <sup>1</sup>H NMR (CDCl<sub>3</sub>, 400 MHz) δ 7.22-7.29 (m, 5H), 6.98 (br s, 1H), 6.70 (d, 1H), 4.99 (br s, *J* = 8.4 Hz, 1H), 5.08 (d, *J* = 6.4 Hz, 1H), 4.77 (q, *J* = 7.2 Hz, 1H), 4.01-4.13 (m, 2H), 3.90 (d, *J* = 5.2 Hz, 1H), 3.74 (s, 3H), 3.09-3.22 (m, 2H), 1.43 (s, 9H), 1.25 (d, *J* = 7.2 Hz, 3H); <sup>13</sup>C NMR (CDCl<sub>3</sub>, 100 MHz) δ 172.9, 171.1, 169.9, 155.7, 136.5, 129.4, 129.3, 128.7, 128.6, 127.0, 80.4, 54.0, 52.3, 50.6, 41.2, 37.5, 28.3, 17.9; HRMS (ESI) Calcd. for C<sub>20</sub>H<sub>30</sub>N<sub>3</sub>O<sub>6</sub> [M+H]<sup>+</sup>: 408.2134, found: 408.2130.

### Z-D-Phg-L-Val-O<sup>t</sup>Bu

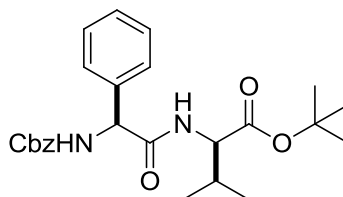

Reaction conducted according to **Method C** afforded product as an amorphous solid. TLC (Hexane:EtOAc=1:2): R<sub>f</sub> = 0.8; [α]<sup>22</sup><sub>D</sub> = -165.3 (c = 1.00, CHCl<sub>3</sub>); IR (CDCl<sub>3</sub>) ν<sub>max</sub> = 3325, 2967, 2934, 2875, 1725, 1659, 1497, 1228, 1152, 1138, 1053, 909, 728, 695 cm<sup>-1</sup>; <sup>1</sup>H NMR (CDCl<sub>3</sub>, 400 MHz) δ 7.29-7.39 (m, 10H), 6.20 (br s, 2H), 6.11 (d, *J* = 8.4 Hz, 1H), 5.25 (d, *J* = 4.4 Hz, 1H), 5.10 (q, *J* = 12.4 Hz, 2H), 4.44 (dd, *J* = 4.4, 8.8 Hz, 1H), 2.03-2.07 (m, 1H), 1.48 (s, 9H), 0.70 (d, *J* = 6.8 Hz, 1H), 0.66 (d, *J* = 6.8 Hz, 3H); <sup>13</sup>C NMR (CDCl<sub>3</sub>, 100 MHz) δ 170.6, 169.3, 155.5, 138.5, 136.2, 129.1, 128.6, 128.5, 128.1, 127.2, 82.4, 67.0, 59.1, 57.4, 31.5, 28.0, 18.6, 17.1; HRMS (ESI) Calcd. for C<sub>29</sub>H<sub>33</sub>N<sub>2</sub>O<sub>5</sub> [M+H]<sup>+</sup>: 489.2389, found: 489.2392.

### Boc-L-Lys-L-Pro-NH<sub>2</sub>

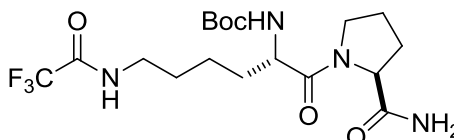

Reaction conducted according to **Method A** afforded product as an amorphous solid. TLC (Hexane:EtOAc=1:5): R<sub>f</sub> = 0.3; [α]<sup>22</sup><sub>D</sub> = + 5.0 (c = 1.00, CHCl<sub>3</sub>); IR (CHCl<sub>3</sub>) ν<sub>max</sub> = 3302, 2978, 1687, 1641, 1447, 1161 cm<sup>-1</sup>; <sup>1</sup>H NMR (CD<sub>3</sub>OD, 500 MHz) δ 4.44 (d, *J* = 4.5 Hz, 1H), 4.33 (s, 1H), 3.83 (s, 1H), 3.67 (s, 1H), 2.23 (d, *J* = 5.0 Hz, 1H), 2.09 (t, *J* = 6.0 Hz, 1H), 1.95-2.00 (m, 3H), 1.79 (s, 1H), 1.57-1.64 (m, 4H), 1.43-1.45 (m, 14H); <sup>13</sup>C NMR (CD<sub>3</sub>OD, 125 MHz) δ 175.6, 172.2, 157.4, 156.6, 117.3, 115.0, 79.2, 59.9, 52.2, 39.1, 30.6, 29.3, 28.1, 27.3, 24.6, 22.5; HRMS (ESI) Calcd. for C<sub>18</sub>H<sub>30</sub>N<sub>4</sub>O<sub>5</sub> [M+H]<sup>+</sup>: 439.2168, found: 439.2169.

### Boc-L-Lys-L-Ala-NH<sub>2</sub>

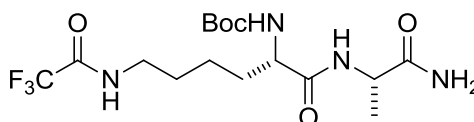

Reaction conducted according to **Method A** afforded product as an amorphous solid. TLC (Hexane:EtOAc=1:5):  $R_f = 0.3$ ;  $[\alpha]_D^{22} = +13.3$  ( $c = 1.00$ ,  $\text{CHCl}_3$ ); IR ( $\text{CHCl}_3$ )  $\nu_{\text{max}} = 3308, 2981, 1744, 1659, 1517, 1227, 1163 \text{ cm}^{-1}$ ;  $^1\text{H NMR}$  ( $\text{CD}_3\text{OD}$ , 500 MHz)  $\delta$  4.37 (s, 1H), 4.00 (s, 1H), 1.79 (s, 1H), 1.60 (s, 3H), 1.46 (s, 12H), 1.38 (d,  $J = 6.5 \text{ Hz}$ , 1H);  $^{13}\text{C NMR}$  ( $\text{CD}_3\text{OD}$ , 125 MHz)  $\delta$  176.0, 173.5, 157.7, 156.7, 117.3, 79.4, 54.8, 48.5, 39.1, 31.2, 28.1, 27.3, 22.7, 16.9; HRMS (ESI) Calcd. for  $\text{C}_{16}\text{H}_{28}\text{F}_3\text{N}_4\text{O}_5$   $[\text{M}+\text{H}]^+$ : 413.2012, found: 413.2014.

### Fmoc-L-Tyr-L-Ala-OMe

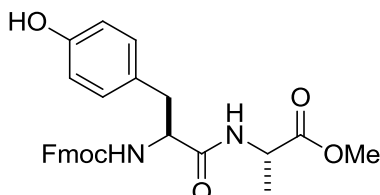

Reaction conducted according to **Method A** afforded product as an amorphous solid. TLC (Hexane:EtOAc=1:2):  $R_f = 0.6$ ;  $[\alpha]_D^{22} = +13.7$  ( $c = 1.00$ ,  $\text{CHCl}_3$ ); IR ( $\text{CDCl}_3$ )  $\nu_{\text{max}} = 3301, 3065, 2925, 2851, 1703, 1660, 1516, 1450, 1227, 759, 740 \text{ cm}^{-1}$ ;  $^1\text{H NMR}$  ( $\text{CDCl}_3$ , 400 MHz)  $\delta$  7.77 (d,  $J = 7.6 \text{ Hz}$ , 2H), 7.55 (t,  $J = 6.0 \text{ Hz}$ , 2H), 7.41 (d,  $J = 7.6 \text{ Hz}$ , 2H), 7.30-7.33 (m, 2H), 7.05 (d,  $J = 6.8 \text{ Hz}$ , 2H), 6.74 (d,  $J = 8.0 \text{ Hz}$ , 2H), 6.24 (s, 1H), 5.34 (d,  $J = 5.6 \text{ Hz}$ , 1H), 5.06 (d,  $J = 2.0 \text{ Hz}$ , 1H), 4.42-4.52 (m, 2H), 4.33-4.38 (m, 1H), 4.20 (t,  $J = 6.8 \text{ Hz}$ , 1H), 3.72 (s, 3H), 3.06 (dd,  $J = 8.4 \text{ Hz}$ , 1H), 2.95 (dd,  $J = 8.4 \text{ Hz}$ , 1H), 1.35 (d,  $J = 6.8 \text{ Hz}$ , 3H);  $^{13}\text{C NMR}$  ( $\text{CDCl}_3$ , 100 MHz)  $\delta$  172.8, 170.3, 154.8, 143.8, 143.7, 141.3, 130.6, 128.2, 127.8, 127.1, 125.0, 120.0, 115.6, 67.1, 56.2, 52.6, 48.2, 47.1, 37.8, 29.7, 18.4; HRMS (ESI) Calcd. for  $\text{C}_{28}\text{H}_{29}\text{N}_2\text{O}_6$   $[\text{M}+\text{H}]^+$ : 489.2025, found: 489.2023.

### Fmoc-L-Val-L-Pro-NH<sub>2</sub>

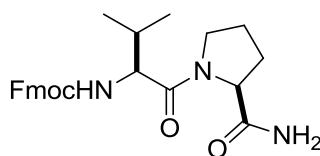

Reaction conducted according to **Method A** afforded product as an amorphous solid. TLC (Hexane:EtOAc=1:1):  $R_f = 0.6$ ;  $[\alpha]_D^{22} = +18.4$  ( $c = 1.00$ ,  $\text{CHCl}_3$ ); IR ( $\text{CDCl}_3$ )  $\nu_{\text{max}} = 3320, 2962, 1707, 1646, 1498, 1447, 1238, 1054, 908, 738, 699 \text{ cm}^{-1}$ ;  $^1\text{H NMR}$  ( $\text{CDCl}_3$ , 400 MHz)  $\delta$  7.77 (d,  $J = 7.6 \text{ Hz}$ , 2H), 7.60 (d,  $J = 6.8 \text{ Hz}$ , 2H), 7.40 (t,  $J = 7.2 \text{ Hz}$ , 2H), 7.30-7.34 (m, 2H), 5.24 (d,  $J = 8.8 \text{ Hz}$ , 1H), 4.42 (d,  $J = 6.8 \text{ Hz}$ , 2H), 4.36 (dd,  $J = 4.8, 9.2 \text{ Hz}$ , 1H), 4.24 (t,  $J = 6.8 \text{ Hz}$ , 1H), 2.22-2.29 (m, 1H), 1.02 (d,  $J = 6.4 \text{ Hz}$ , 3H), 0.96 (d,  $J = 6.8 \text{ Hz}$ , 3H);  $^{13}\text{C NMR}$  ( $\text{CDCl}_3$ , 100 MHz)  $\delta$  144.1, 143.9, 141.6, 128.0, 127.3, 125.3, 120.2, 67.4, 58.9, 47.4, 31.2, 19.2, 17.7; HRMS (ESI) Calcd. for  $\text{C}_{25}\text{H}_{30}\text{N}_3\text{O}_4$   $[\text{M}+\text{H}]^+$ : 436.2236, found: 436.2233.

### Z-L-Tyr-L-Ala-OMe

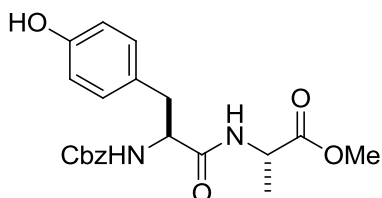

Reaction conducted according to **Method A** afforded product as an amorphous solid. TLC (Hexane:EtOAc=1:5):  $R_f = 0.3$ ;  $[\alpha]_D^{22} = +90.9$  ( $c = 1.00$ ,  $\text{CHCl}_3$ ); IR ( $\text{CHCl}_3$ )  $\nu_{\text{max}} = 3320, 3030, 2953, 1697, 1654, 1516, 1450, 1216, 753\text{cm}^{-1}$ ;  $^1\text{H NMR}$  ( $\text{CD}_3\text{OD}$ , 400 MHz)  $\delta$  7.26-7.35 (m, 5H), 7.06-7.10 (m, 2H), 6.69-6.73 (m, 2H), 5.04 (q,  $J = 12.8$  Hz, 2H), 4.43 (q,  $J = 7.2$  Hz, 1H), 4.436 (dd,  $J = 5.6, 9.2$  Hz, 1H), 3.71 (s, 3H), 3.05 (dd,  $J = 5.6, 14.0$  Hz, 1H), 2.77 (dd,  $J = 9.2, 14.0$  Hz, 1H), 1.39 (d,  $J = 7.6$  Hz, 3H);  $^{13}\text{C NMR}$  ( $\text{CD}_3\text{OD}$ , 100 MHz)  $\delta$  174.4, 174.1, 158.2, 157.3, 138.2, 131.4, 129.5, 129.1, 128.9, 128.6, 116.2, 67.5, 57.8, 52.8, 38.5, 17.5; HRMS (ESI) Calcd. for  $\text{C}_{21}\text{H}_{25}\text{N}_2\text{O}_6$   $[\text{M}+\text{H}]^+$ : 401.1712, found: 401.1717.

### Boc-L-Val-L-Pro-NH<sub>2</sub>

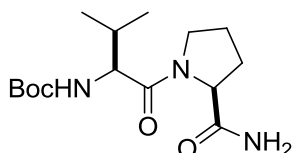

Reaction conducted according to **Method A** afforded product as an amorphous solid. TLC (Hexane:EtOAc=1:3):  $R_f = 0.3$ ;  $[\alpha]_D^{22} = +35.5$  ( $c = 1.00$ ,  $\text{CHCl}_3$ ); IR ( $\text{CDCl}_3$ )  $\nu_{\text{max}} = 3320, 3030, 2953, 1697, 1654, 1516, 1450, 1216, 753\text{cm}^{-1}$ ;  $^1\text{H NMR}$  (MeOD, 500 MHz)  $\delta$  6.85 (br s, 1H), 5.48 (br s, 1H), 5.22 (d,  $J = 8.5$  Hz, 1H), 4.62 (d,  $J = 8.5$  Hz, 1H), 4.29 (t,  $J = 7.0$  Hz, 1H), 3.75 (q,  $J = 7.5$  Hz, 1H), 3.61 (m, 1H), 2.37-2.40 (q,  $J = 6.0$  Hz, 1H), 2.10-2.14 (m, 1H), 1.97-2.04 (m, 2H), 1.88-1.95 (m, 1H), 1.44 (s, 9H), 0.99 (d,  $J = 7.0$  Hz, 1H), 0.93 (d,  $J = 6.5$  Hz, 1H);  $^{13}\text{C NMR}$  ( $\text{CDCl}_3$ , 125 MHz)  $\delta$  173.1, 172.7, 155.8, 79.7, 59.3, 56.9, 47.6, 31.5, 28.3, 28.3, 26.8, 25.1, 19.4, 17.5; HRMS (ESI) Calcd. for  $\text{C}_{15}\text{H}_{28}\text{N}_3\text{O}_4$   $[\text{M}+\text{H}]^+$ : 314.2080, found: 314.2078.

### Boc-L-Tyr-N-Me-L-Ala-OMe

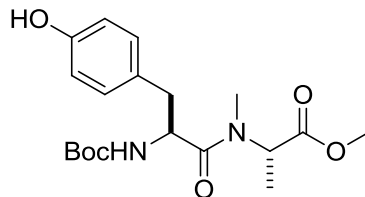

Reaction conducted according to **Method A** afforded product as an amorphous solid. TLC (Hexane:EtOAc=1:3):  $R_f = 0.4$ ;  $[\alpha]_D^{22} = -10.9$  ( $c = 1.00$ ,  $\text{CHCl}_3$ ); IR (thin film)  $\nu_{\text{max}} = 3311, 2979, 1742, 1637, 1516, 1248, 1170, 1102\text{cm}^{-1}$ ;  $^1\text{H NMR}$  ( $\text{CDCl}_3$ , 400 MHz)  $\delta$  7.07 (d,  $J = 8.4$  Hz, 2H), 6.72 (d,  $J = 8.4$  Hz, 2H), 5.52 (s, 1H), 5.33 (d,  $J = 8.8$  Hz, 1H), 5.15 (q,  $J = 7.2$  Hz, 1H), 4.78-4.83 (m, 1H), 3.72 (s, 3H), 3.00 (dd,  $J = 6.8, 7.2$  Hz, 1H), 2.85 (s, 3H), 1.41 (s, 9H), 1.41 (d,  $J = 7.2$  Hz, 3H);  $^{13}\text{C NMR}$  ( $\text{CDCl}_3$ , 100 MHz)  $\delta$  172.1, 171.9, 155.2, 154.8, 130.8, 130.6, 127.9, 115.4, 115.3, 79.8, 52.6, 52.3, 51.8, 38.3, 31.4, 28.3, 14.2; HRMS (ESI) Calcd. for  $\text{C}_{19}\text{H}_{29}\text{N}_2\text{O}_6$   $[\text{M}+\text{H}]^+$ : 381.2025, found: 381.2022.

### Z-L-Phg-L-Phe-OMe

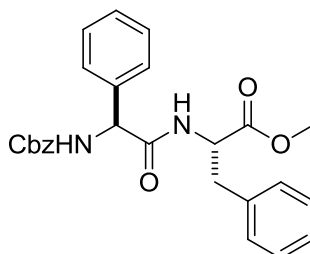

Reaction conducted according to **Method A** afforded product as an amorphous solid. TLC (Hexane:EtOAc=1:3):  $R_f = 0.3$ ;  $[\alpha]_D^{22} = -35.5$  ( $c = 1.00$ ,  $\text{CHCl}_3$ ); IR ( $\text{CDCl}_3$ )  $\nu_{\text{max}} = 3320, 3030, 2953, 1697, 1654, 1516, 1450, 1216, 753\text{cm}^{-1}$ ;  $^1\text{H NMR}$  ( $\text{CDCl}_3$ , 400 MHz)  $\delta$  7.25-7.35 (m, 13H), 7.05 (d,  $J = 6.4$  Hz, 2H), 6.08 (d,  $J = 7.6$  Hz, 1H), 5.99 (br s, 1H), 5.15 (d,  $J = 13.6$  Hz, 1H), 5.09 (q,  $J = 12.4$  Hz, 2H), 4.80 (q,  $J = 5.6$  Hz, 1H), 3.65 (s, 3H);  $^{13}\text{C NMR}$  ( $\text{CDCl}_3$ , 100 MHz)  $\delta$  171.2, 169.3, 155.6, 137.4, 136.1, 135.4, 129.2, 129.1, 128.7, 128.5, 128.2, 128.1, 127.7, 127.3, 67.1, 59.0, 53.5, 52.4, 37.6; HRMS (ESI) Calcd. for  $\text{C}_{26}\text{H}_{27}\text{N}_2\text{O}_5$   $[\text{M}+\text{H}]^+$ : 447.1920, found: 447.1977.

### Z-D-Phg-L-Phe-OMe

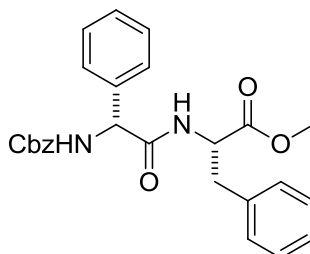

Reaction conducted according to **Method A** afforded product as an amorphous solid. TLC (Hexane : EtOAc = 1 : 3):  $R_f = 0.3$ ;  $[\alpha]_D^{22} = +35.5$  ( $c = 1.00$ ,  $\text{CHCl}_3$ ); IR ( $\text{CDCl}_3$ )  $\nu_{\text{max}} = 3320, 3030, 2953, 1697, 1654, 1516, 1450, 1216, 753\text{cm}^{-1}$ ;  $^1\text{H NMR}$  (MeOD, 400 MHz)  $\delta$  7.27-7.36 (m, 12H), (m, 2H), 7.07 (d,  $J = 6.4$  Hz, 2H), 6.10 (d,  $J = 7.6$  Hz, 1H), 6.01 (s, 1H), 5.17 (d,  $J = 14.0$  Hz, 1H), 5.09 (q,  $J = 12.4$  Hz, 1H), 4.82 (q,  $J = 5.6$  Hz, 1H), 3.67 (s, 3H), 3.19 (dd,  $J = 5.6, 14.0$  Hz, 1H), 3.08 (dd,  $J = 6.0, 14.0$  Hz, 1H);  $^{13}\text{C NMR}$  (MeOD, 100 MHz)  $\delta$  171.2, 169.3, 137.4, 136.2, 135.4, 129.2, 129.1, 128.7, 128.5, 128.2, 128.1, 127.7, 127.3, 67.1, 59.0, 53.5, 52.4, 37.6; HRMS (ESI) Calcd. for  $\text{C}_{26}\text{H}_{27}\text{N}_2\text{O}_5$   $[\text{M}+\text{H}]^+$ : 447.1920, found: 447.1978.

### Boc-L-Ala-D-Glu(OMe)-L-Lys(OTf)-D-Ala-D-Ala-OMe

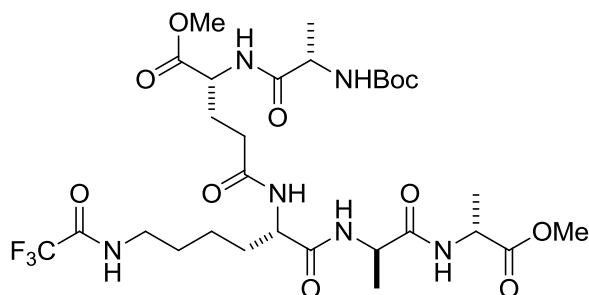

Reaction of Boc-D-Ala-OMe (567.6 mg, 3.0 mmol) and D-Ala-OMe hydrochloride (278.1 mg, 2.0 mmol) was conducted according to **Method A** to afford dipeptide Boc-D-Ala-D-Ala-OMe (521.2 mg, 95%), which was treated with 10.0 ml of 4N HCl/dioxane under Ar atm. After stirring for 15 minutes, the volatiles were removed under *vacuo*. Residual HCl was removed by repeating three times of adding 10.0 ml of diethylether and removing it under *vacuo*. The hydrochloride salt was dried under vacuum for 1h and directly used for the next reaction that was conducted according to **Method A**. Repeating the same deprotection and coupling procedures finally afforded Boc-L-Ala-D-Glu(OMe)-L-Lys(OTf)-D-Ala-D-Ala-OMe (1150.2 mg) as an amorphous solid. TLC (Choloform : MeOH = 4 : 1)  $R_f = 0.35$ ;  $[\alpha]_D^{22} = +53.7$  ( $c = 1.00$ ,  $\text{CHCl}_3$ ); IR ( $\text{DMSO}-d_6$ )  $\nu_{\text{max}} = 3320, 3030, 2953, 1697, 1654, 1516, 1450, 1216, 753\text{cm}^{-1}$ ;  $^1\text{H NMR}$  ( $\text{DMSO}-d_6$ , 400 MHz)  $\delta$  9.40 (t,  $J = 5.2$  Hz, 1H), 8.20 (d,  $J = 8.0$  Hz, 2H), 8.18 (d,  $J = 9.2$  Hz, 1H), 8.03 (d,  $J = 7.6$  Hz, 1H), 6.86 (d,  $J = 7.6$  Hz, 1H), 4.16-4.31 (m, 4H), 3.96-4.03 (m, 1H), 3.61 (s, 3H), 3.60 (s, 3H), 3.14 (q,  $J = 6.0$  Hz, 2H), 2.13-2.18 (m, 1H), 1.73-1.83 (m, 1H), 1.54-1.62 (m, 1H),

1.48-1.58 (m, 4H), 1.46 (s, 9H), 1.16-1.37 (m, 12H);  $^{13}\text{C}$  NMR (DMSO- $d_6$ , 100 MHz)  $\delta$  172.9, 172.8, 172.1, 172.0, 171.5, 171.4, 156.3, 155.9, 154.9, 117.4, 114.5, 78.0, 52.7, 51.8, 51.4, 49.5, 47.5, 47.5, 31.3, 31.1, 28.1, 27.9, 27.0, 22.5, 18.4, 17.9, 16.7; HRMS (ESI) Calcd. for  $\text{C}_{29}\text{H}_{48}\text{F}_3\text{N}_6\text{O}_{11}$   $[\text{M}+\text{H}]^+$ : 713.3333, found: 713.3331.

## NMR spectra

Cyano-acetic acid 2,2-dimethyl-[1,3]dioxolan-4-ylmethyl ester (**6**)

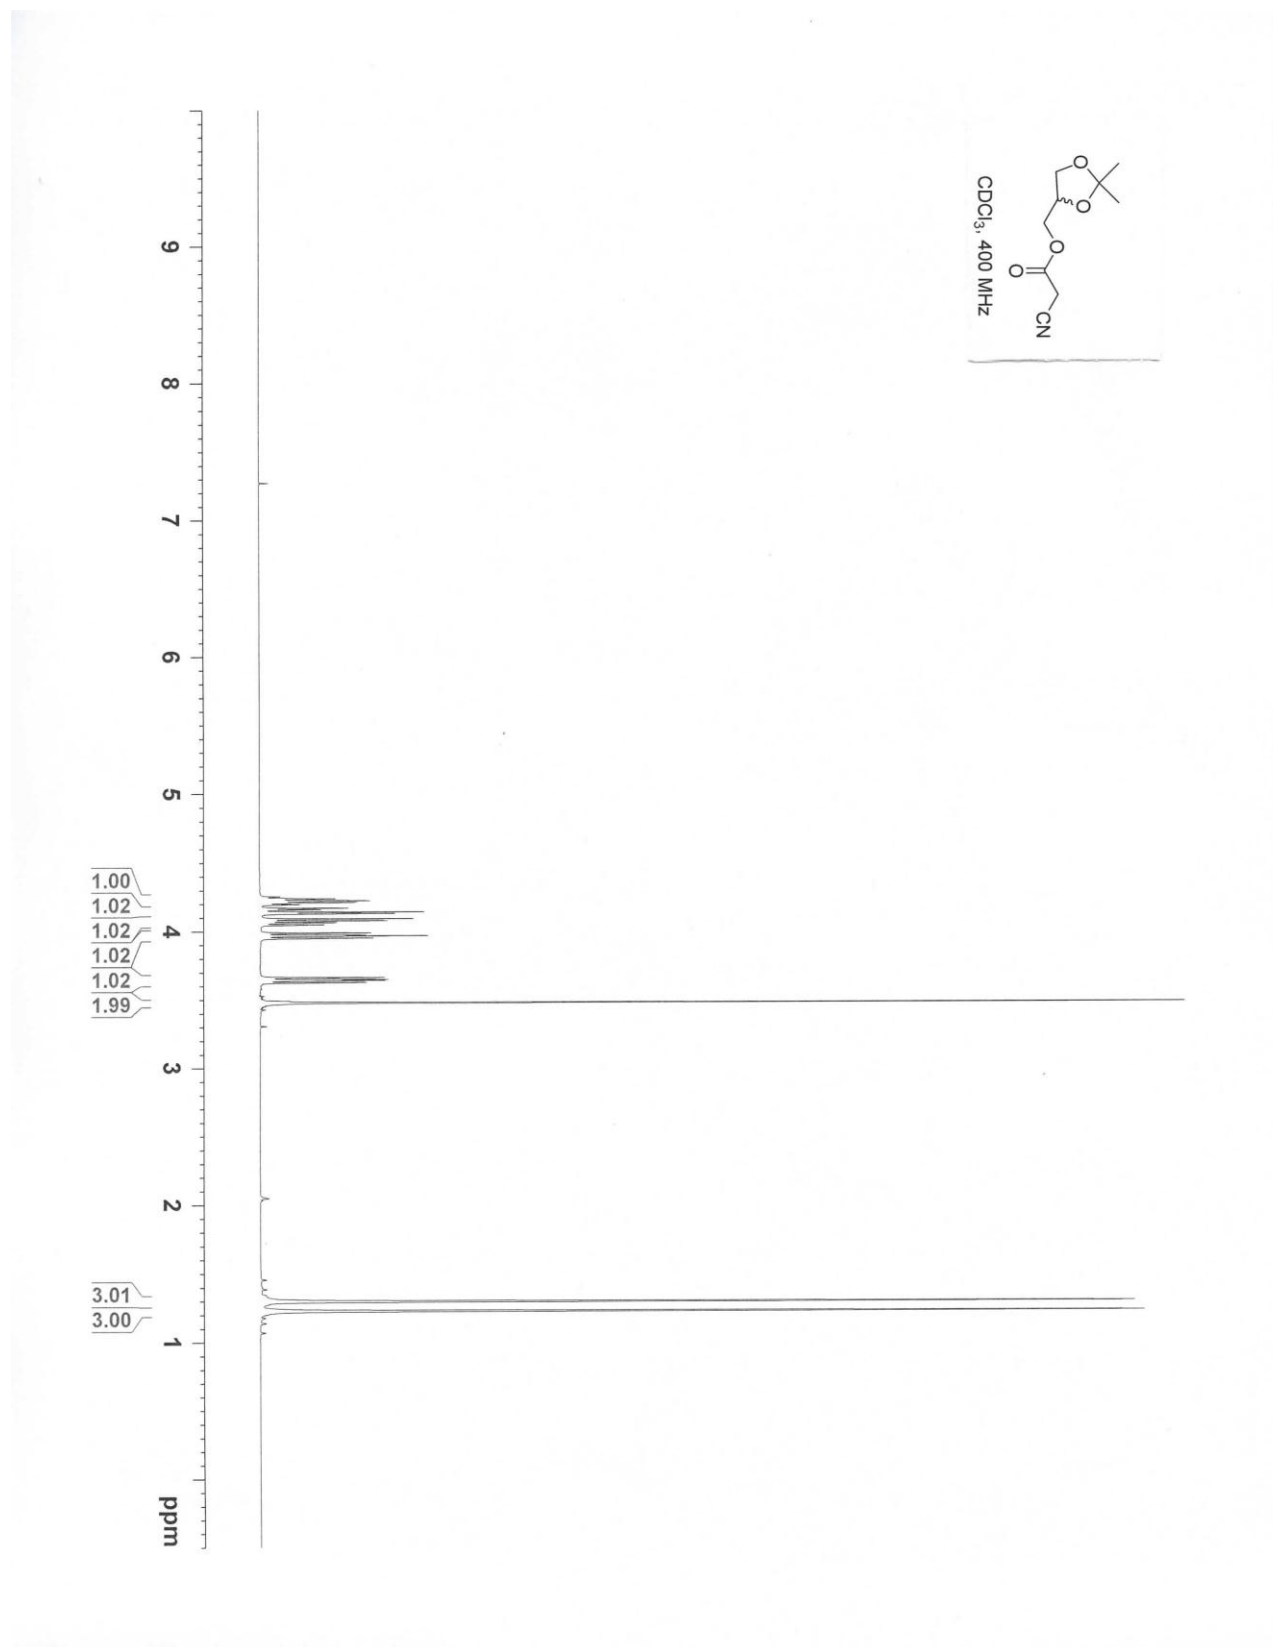



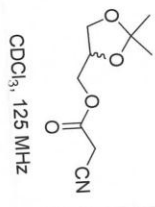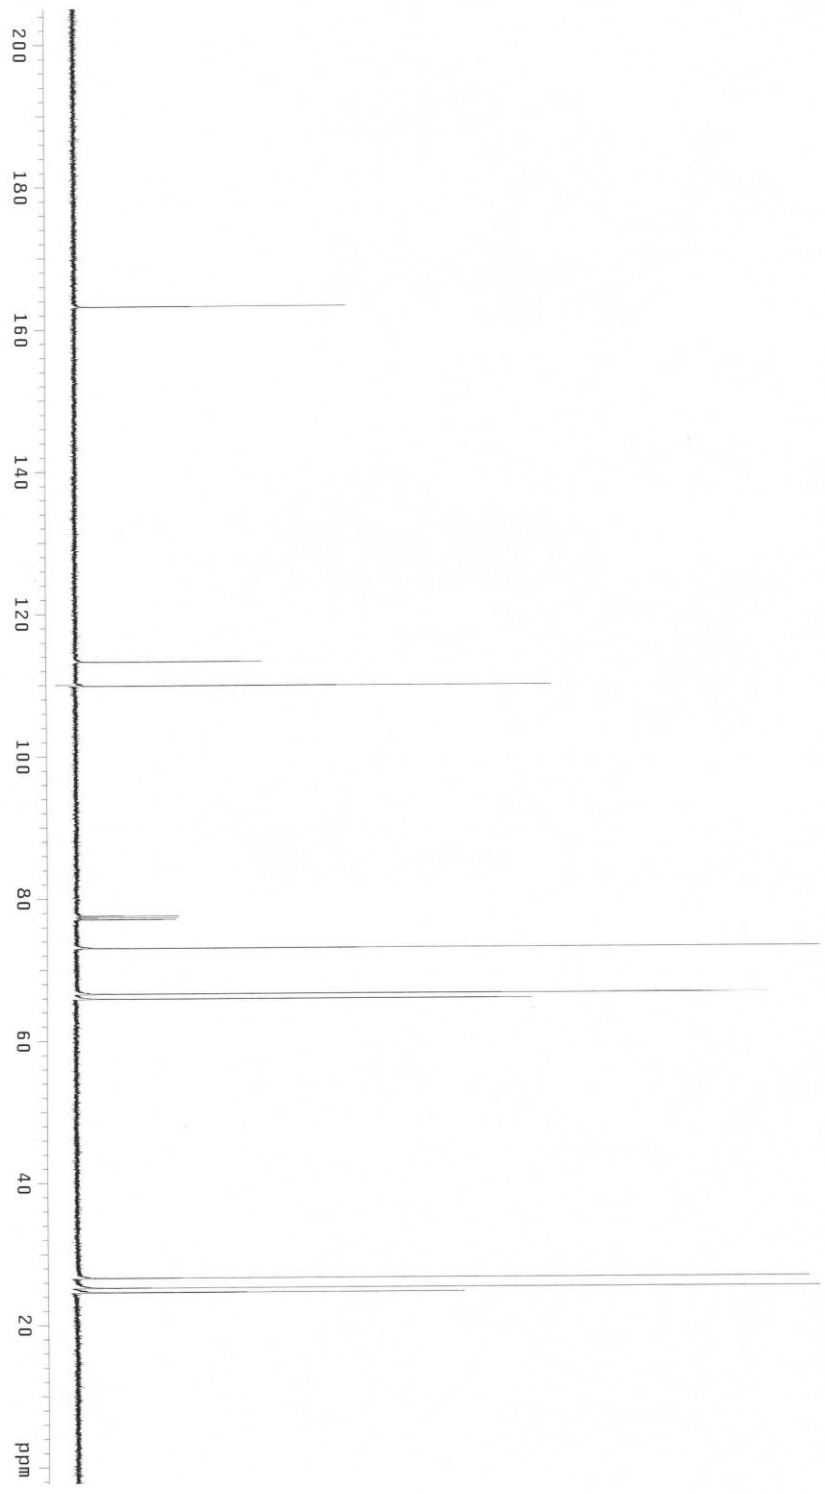

Cyano-hydroxyimino-acetic acid 2,3-dihydroxy-propyl ester (3)

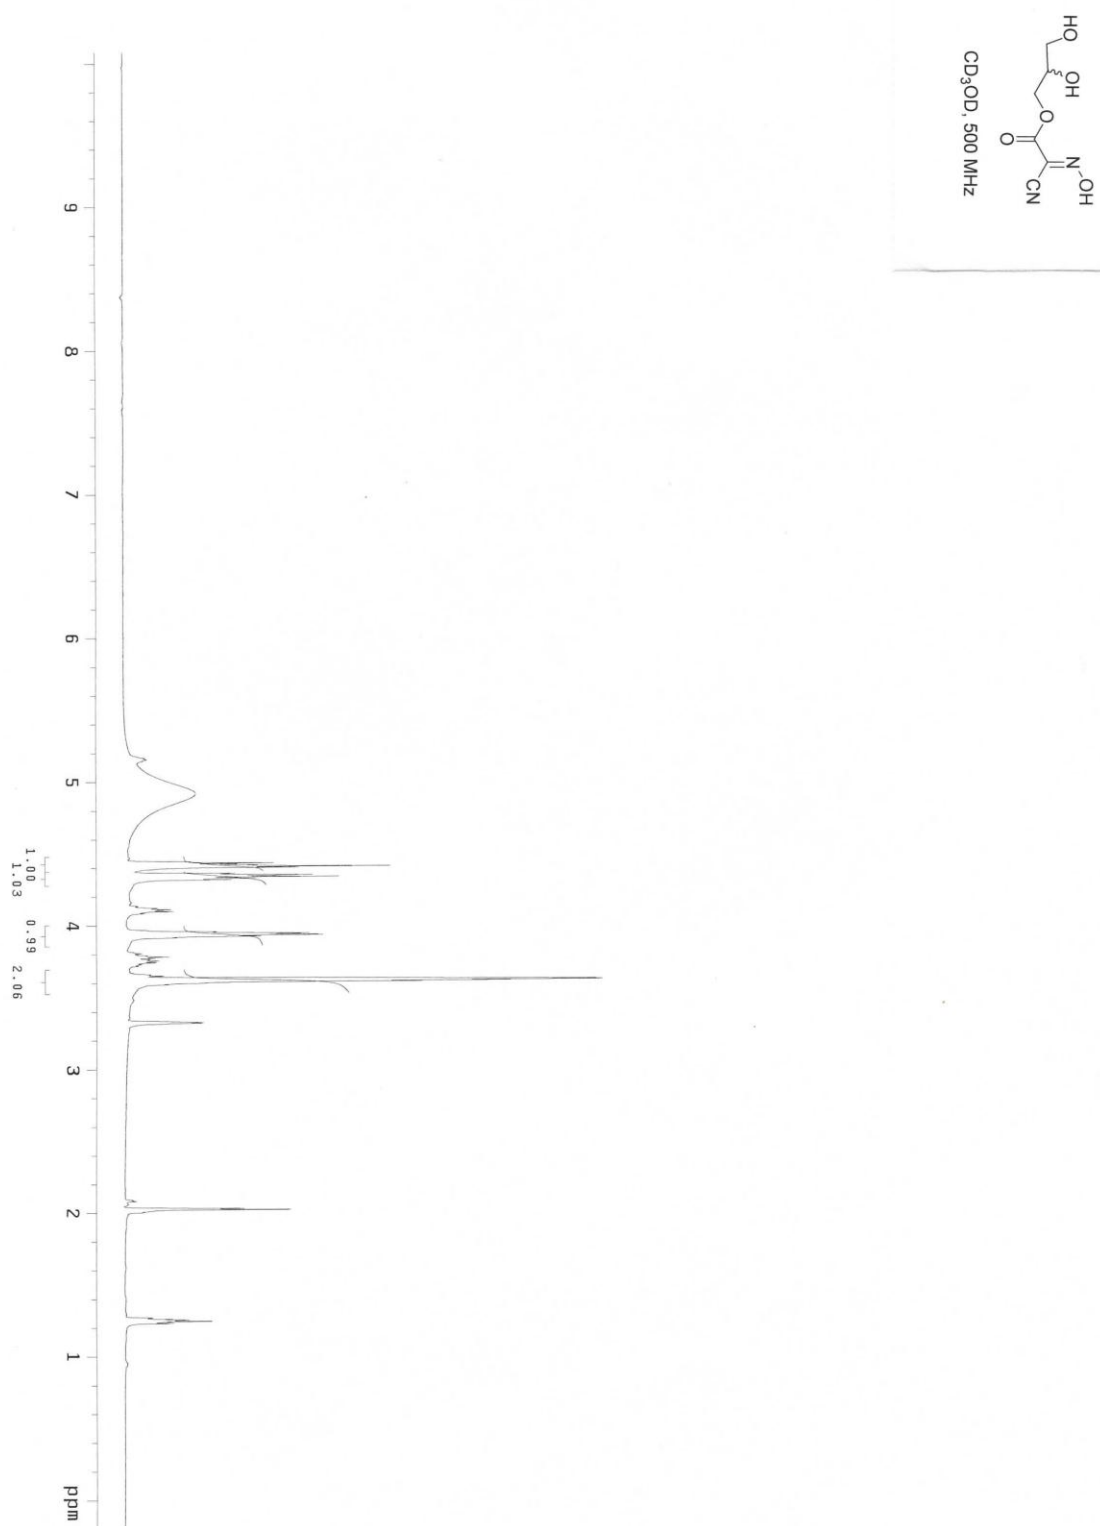

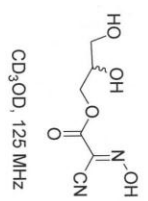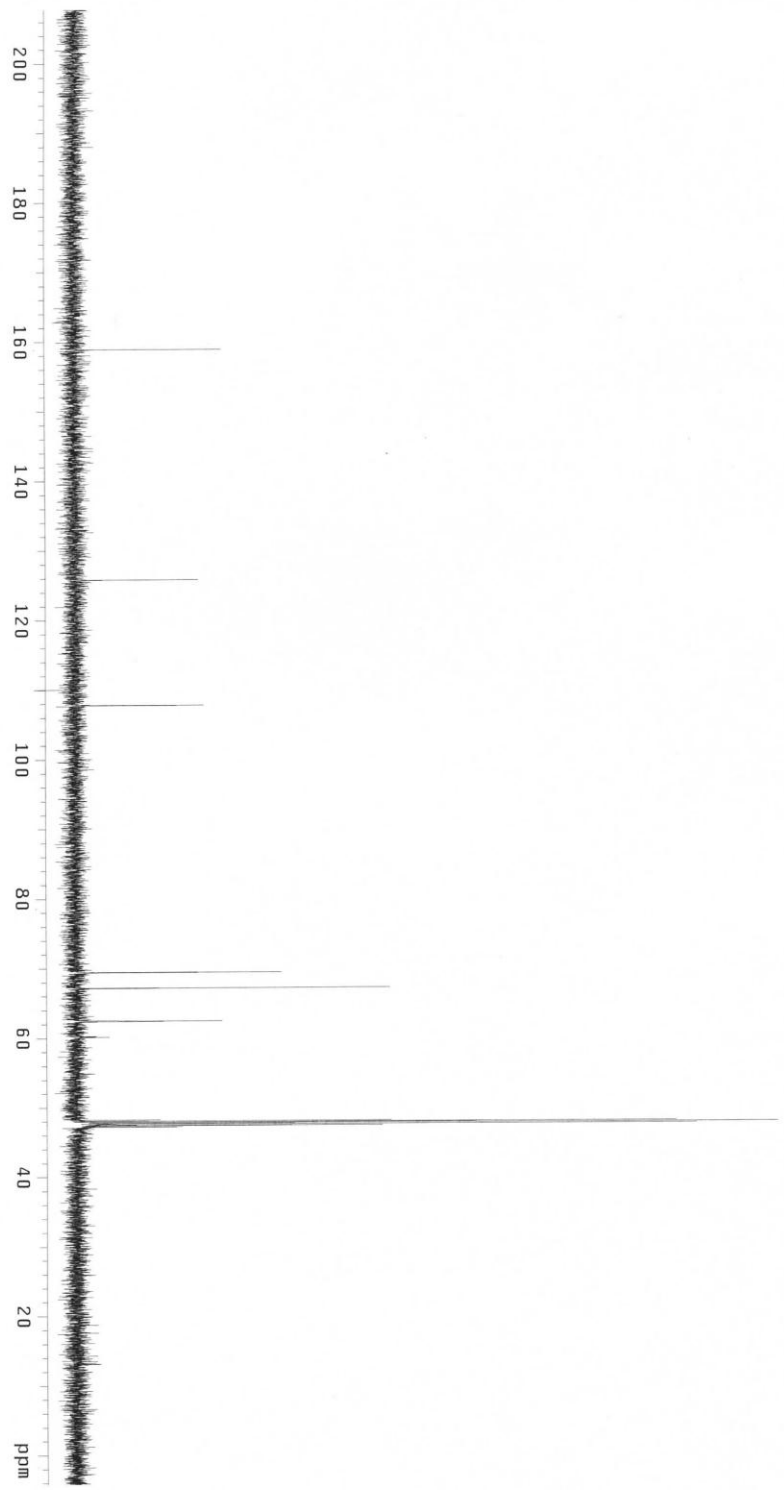

Cyano-hydroxyimino-acetic acid 2,2-dimethyl-[1,3]dioxolan-4-ylmethyl ester (2)

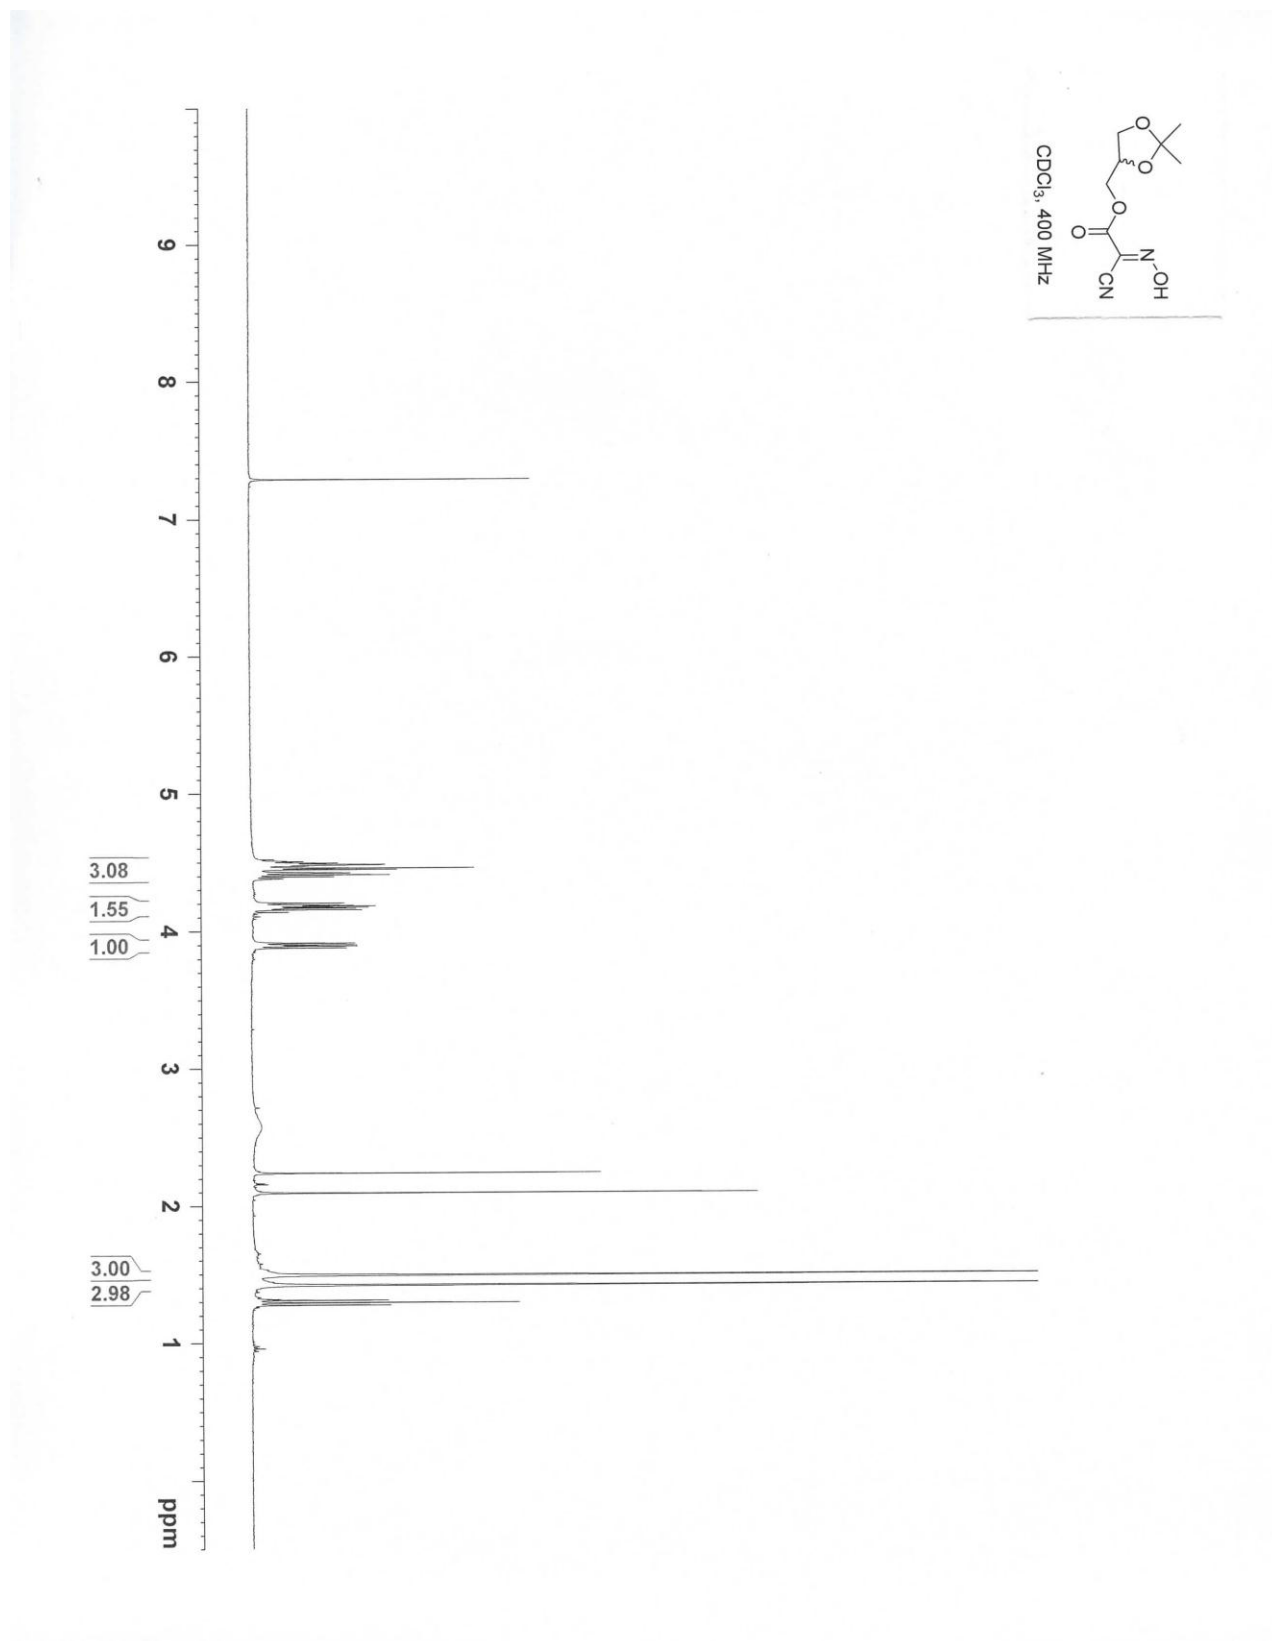

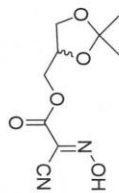

CDCl<sub>3</sub>, 100 MHz

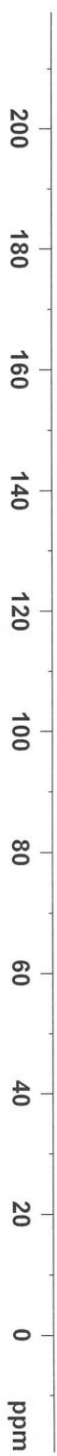

Z-L-Phg-L-Pro-NH<sub>2</sub>

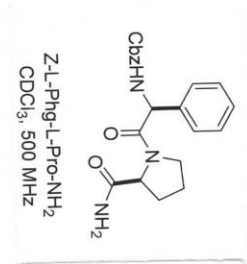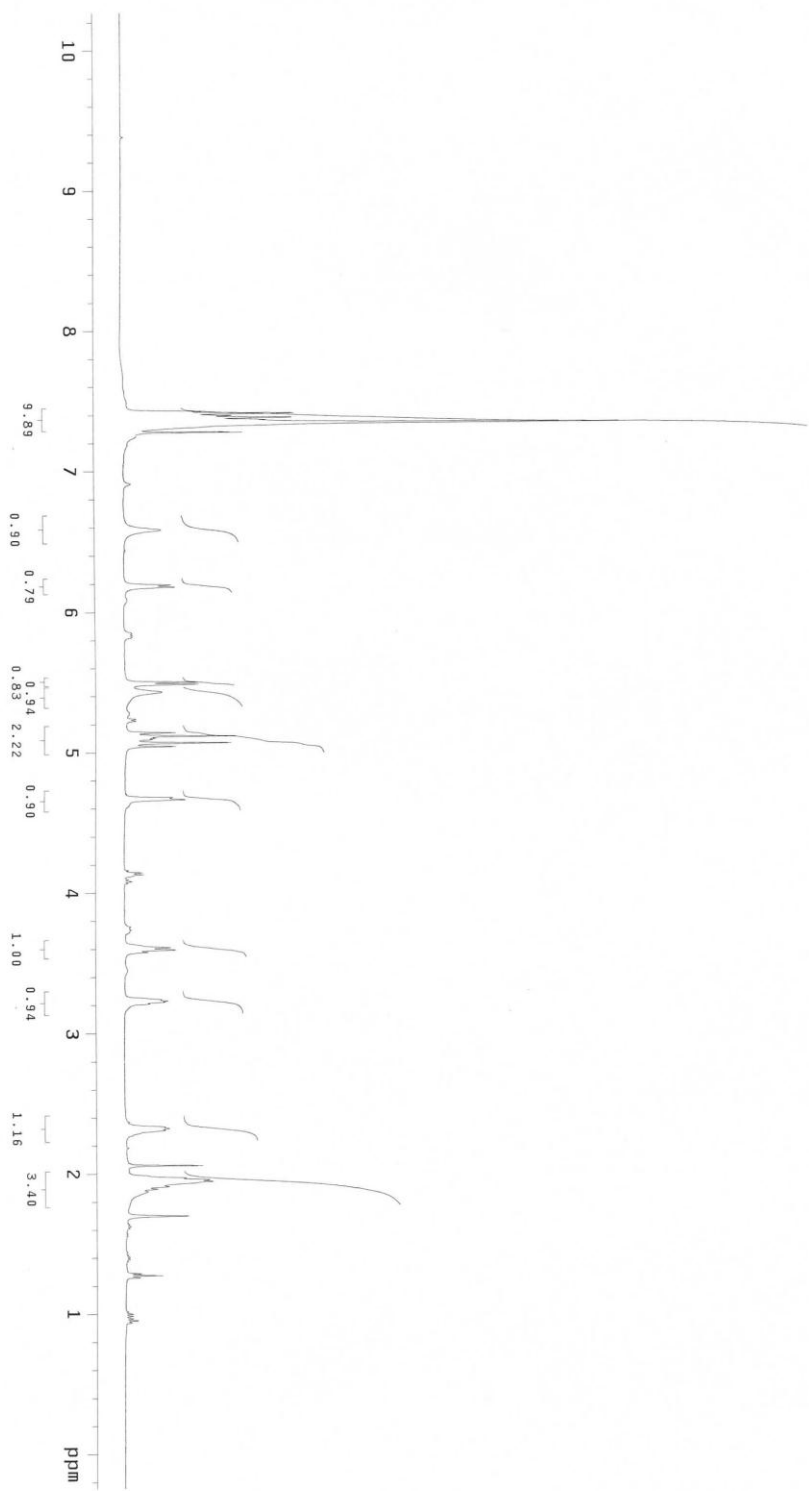

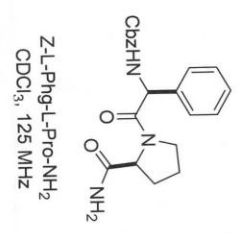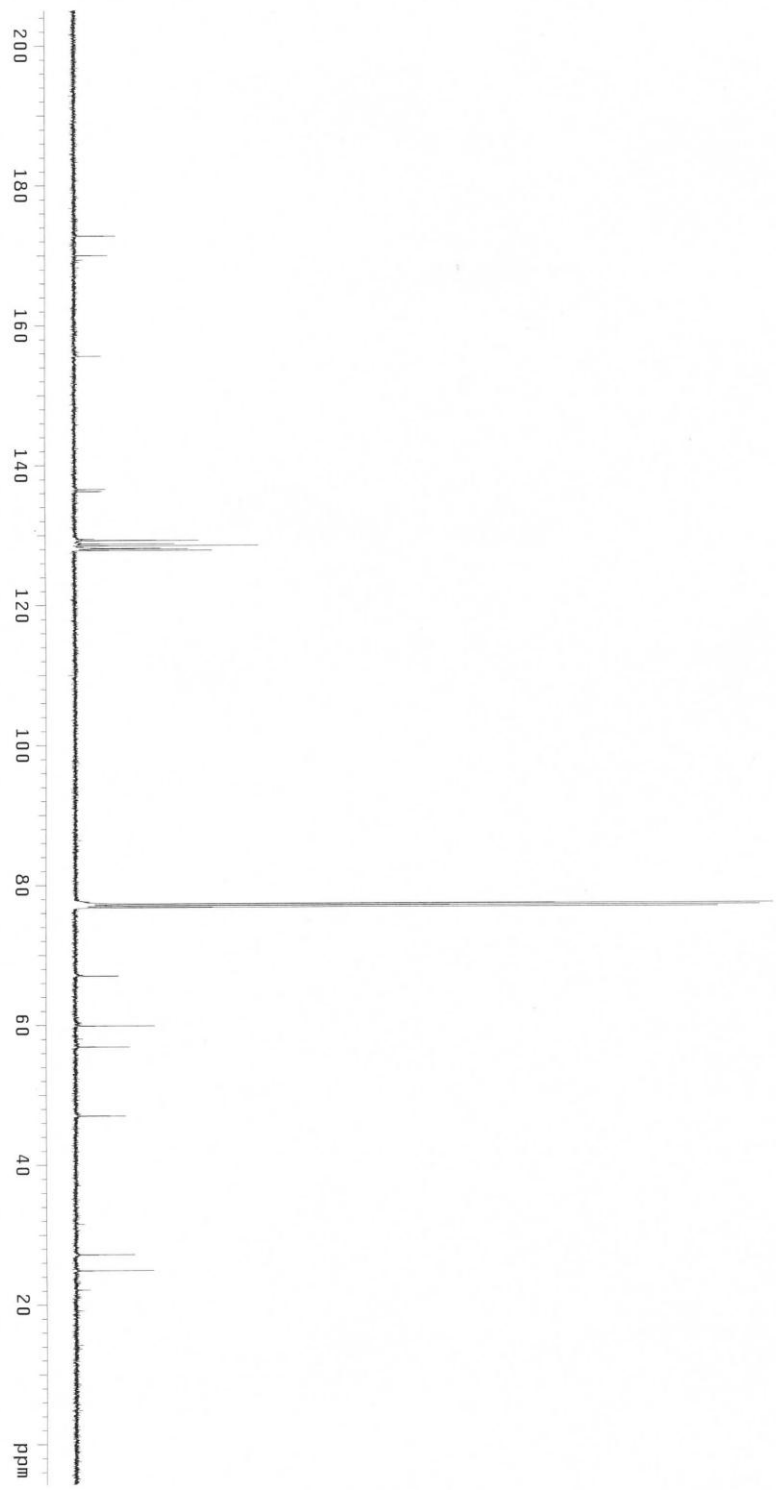

Z-D-Phg-L-Pro-NH<sub>2</sub>

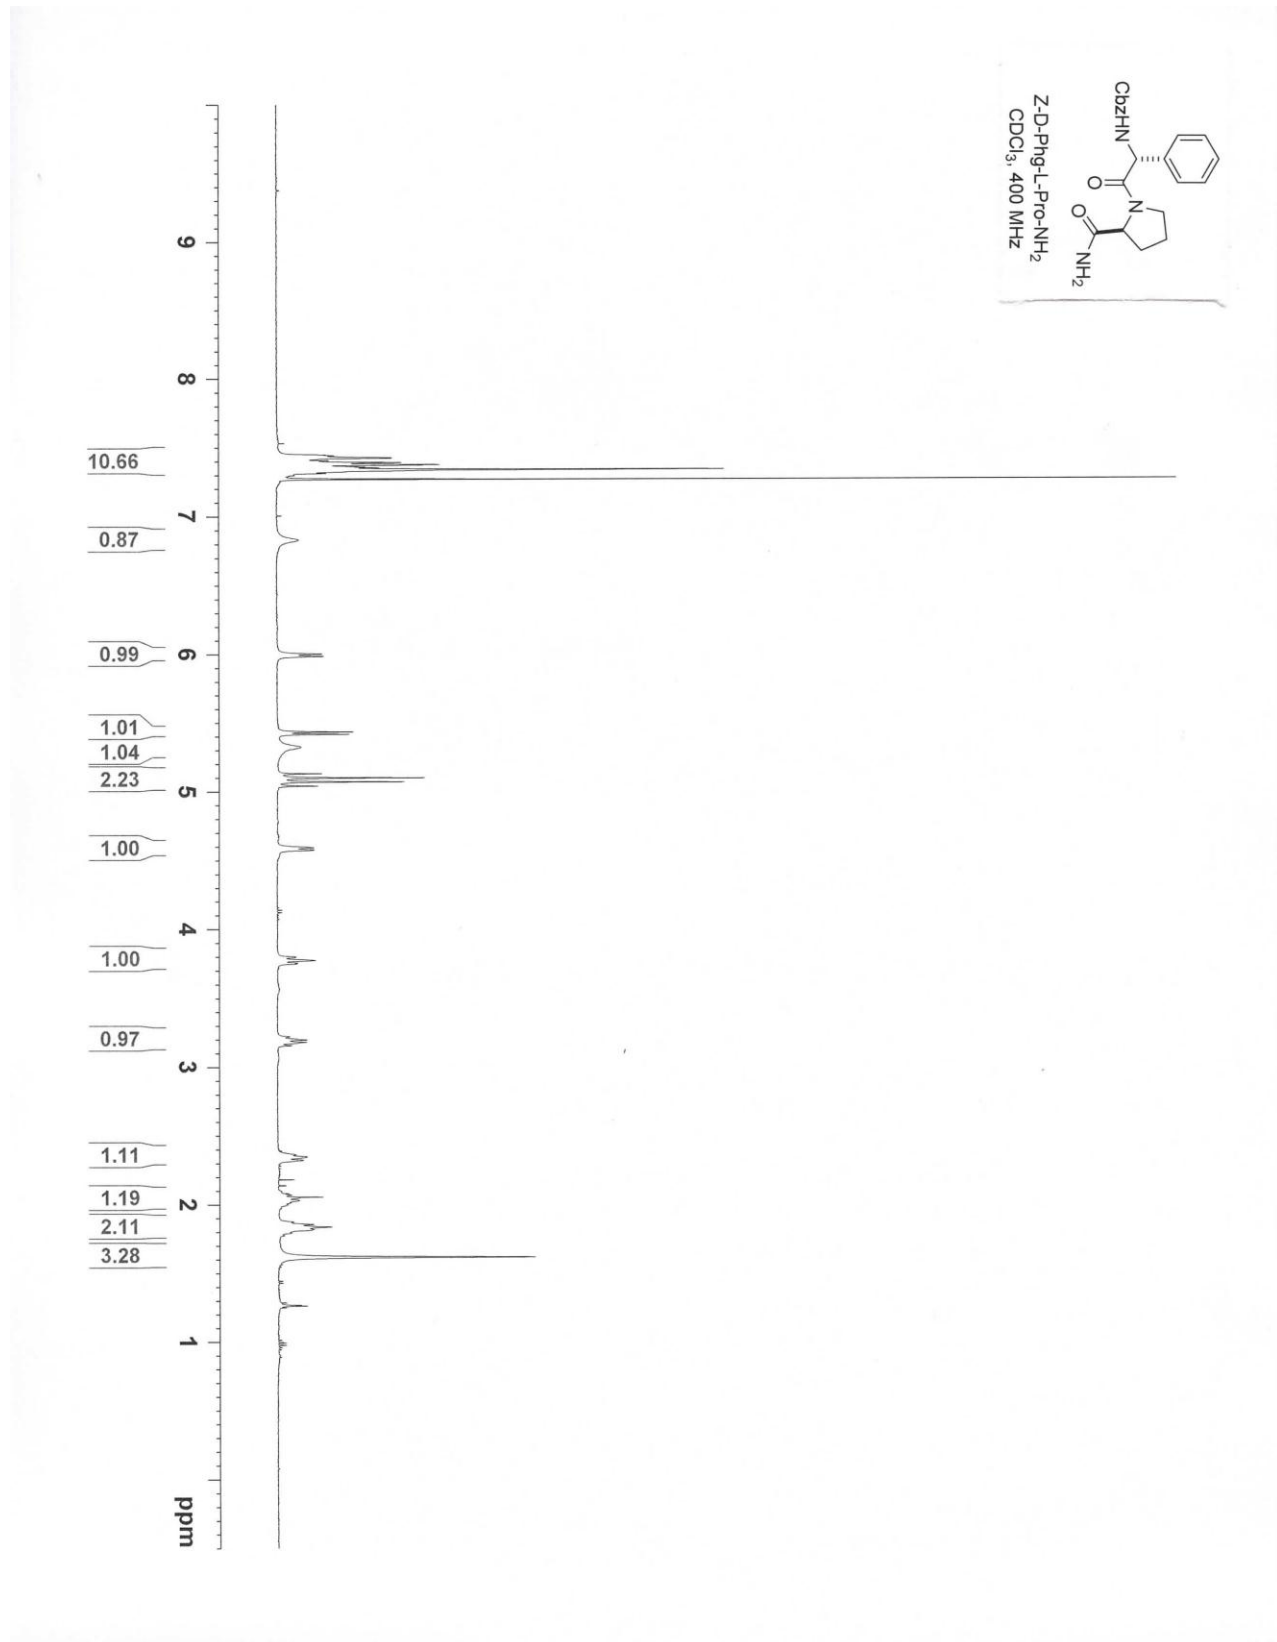



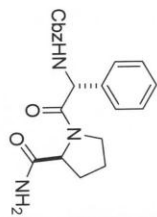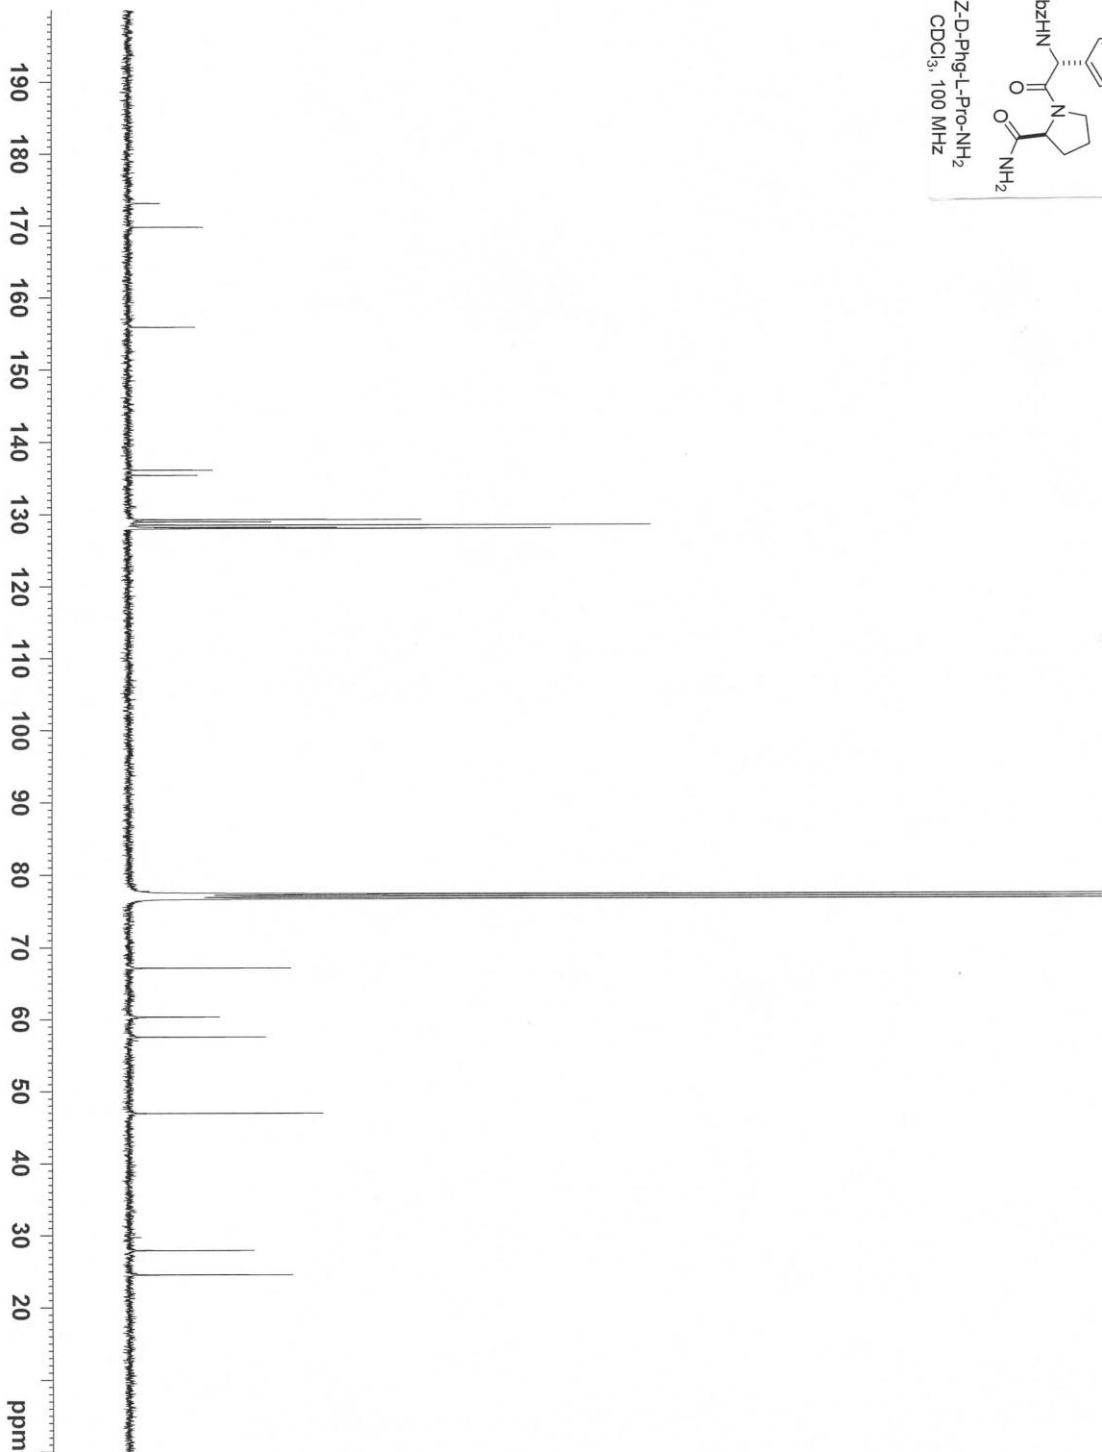

Boc-L-Val-Gly-OMe

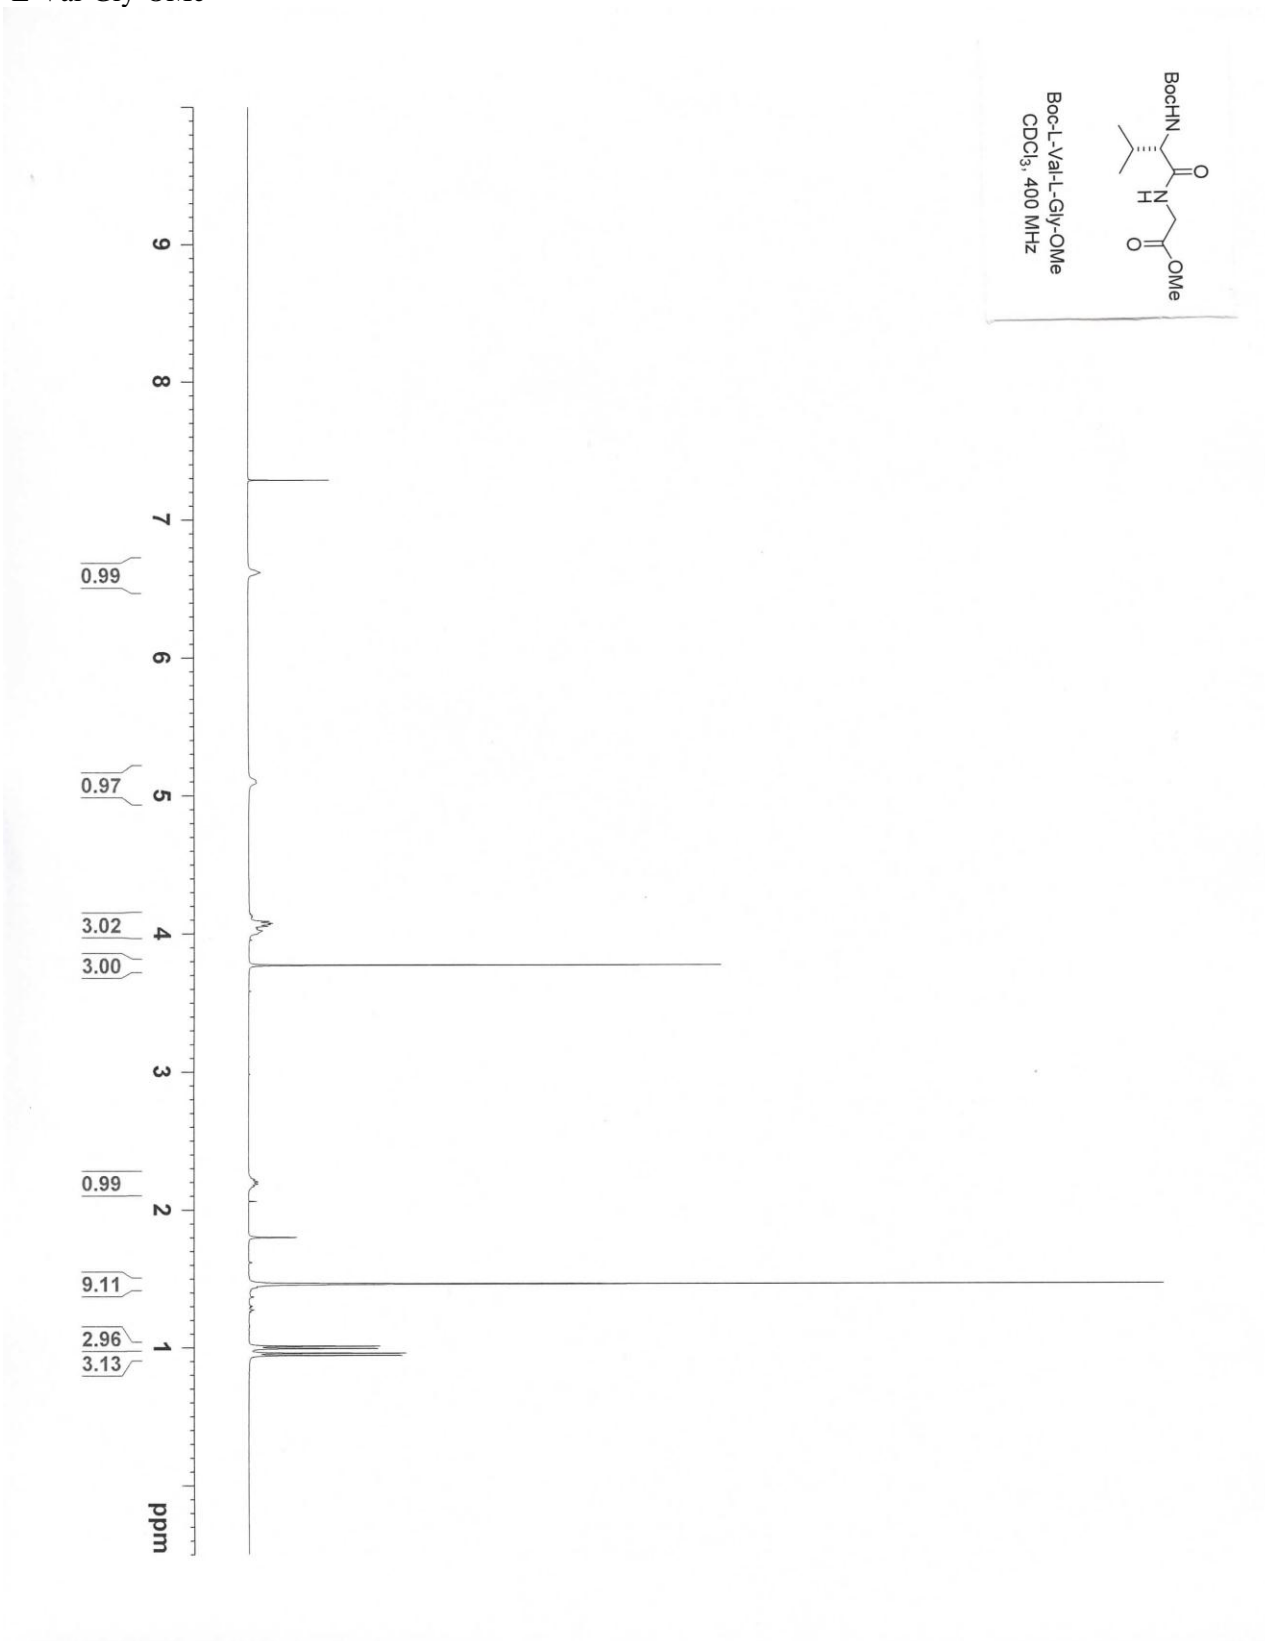

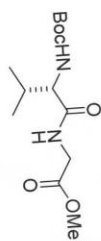

Boc-L-Val-L-Gly-OMe  
CDCl<sub>3</sub>, 100 MHz

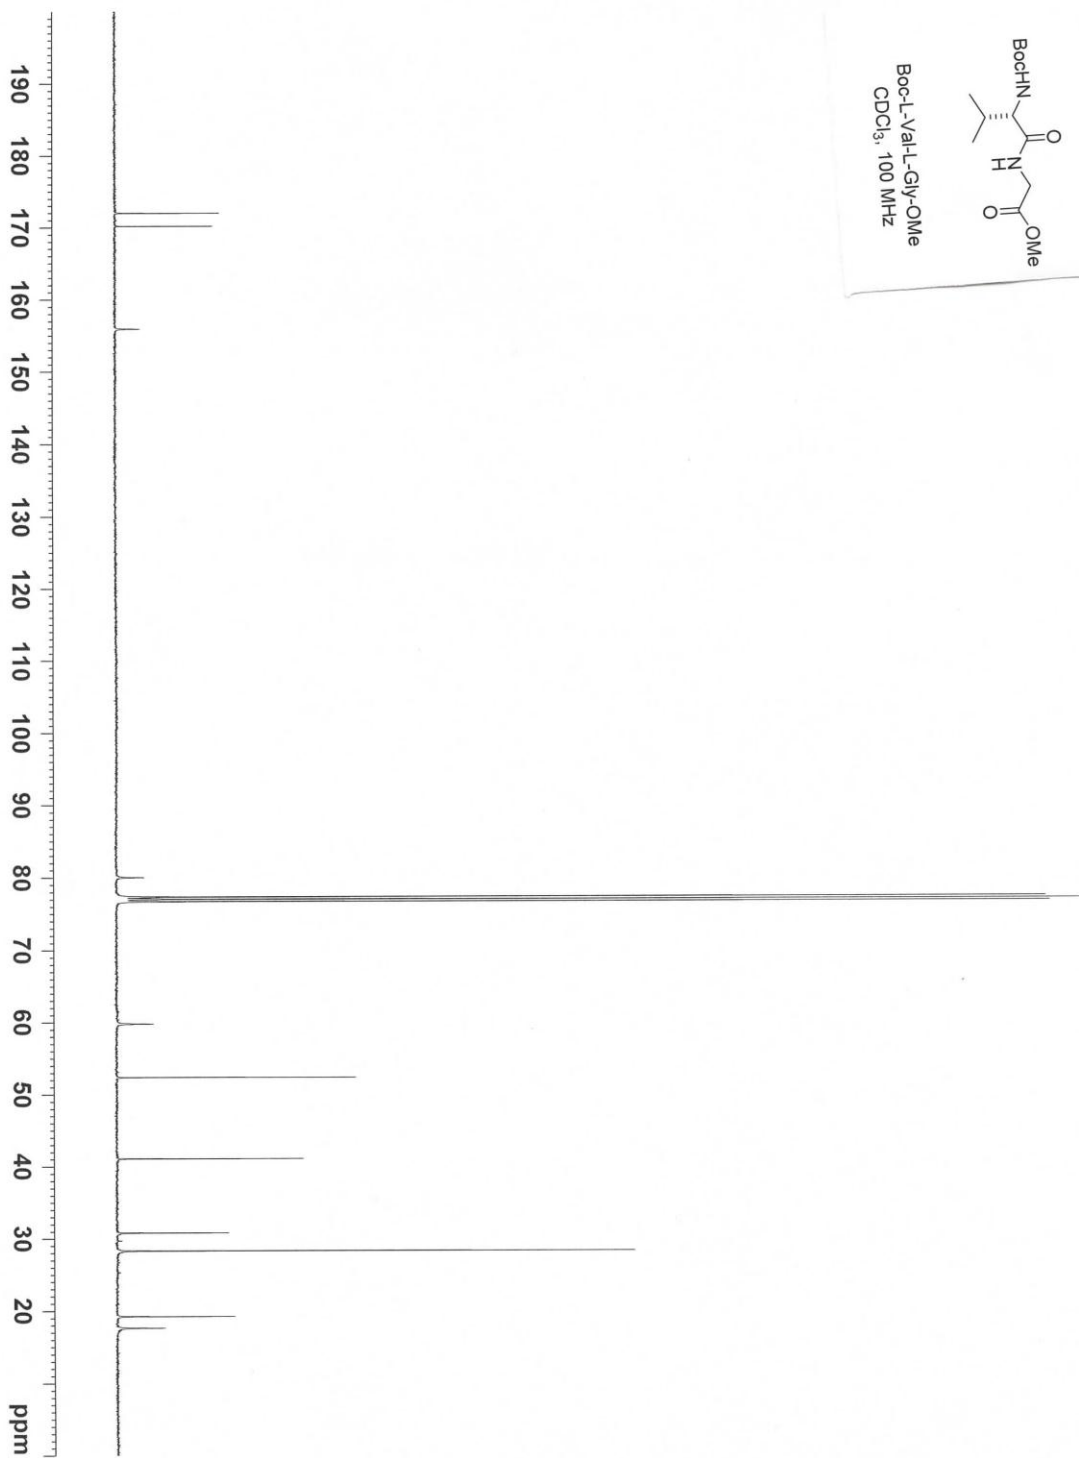

Z-L-Phg-L-Phe-O<sup>t</sup>Bu

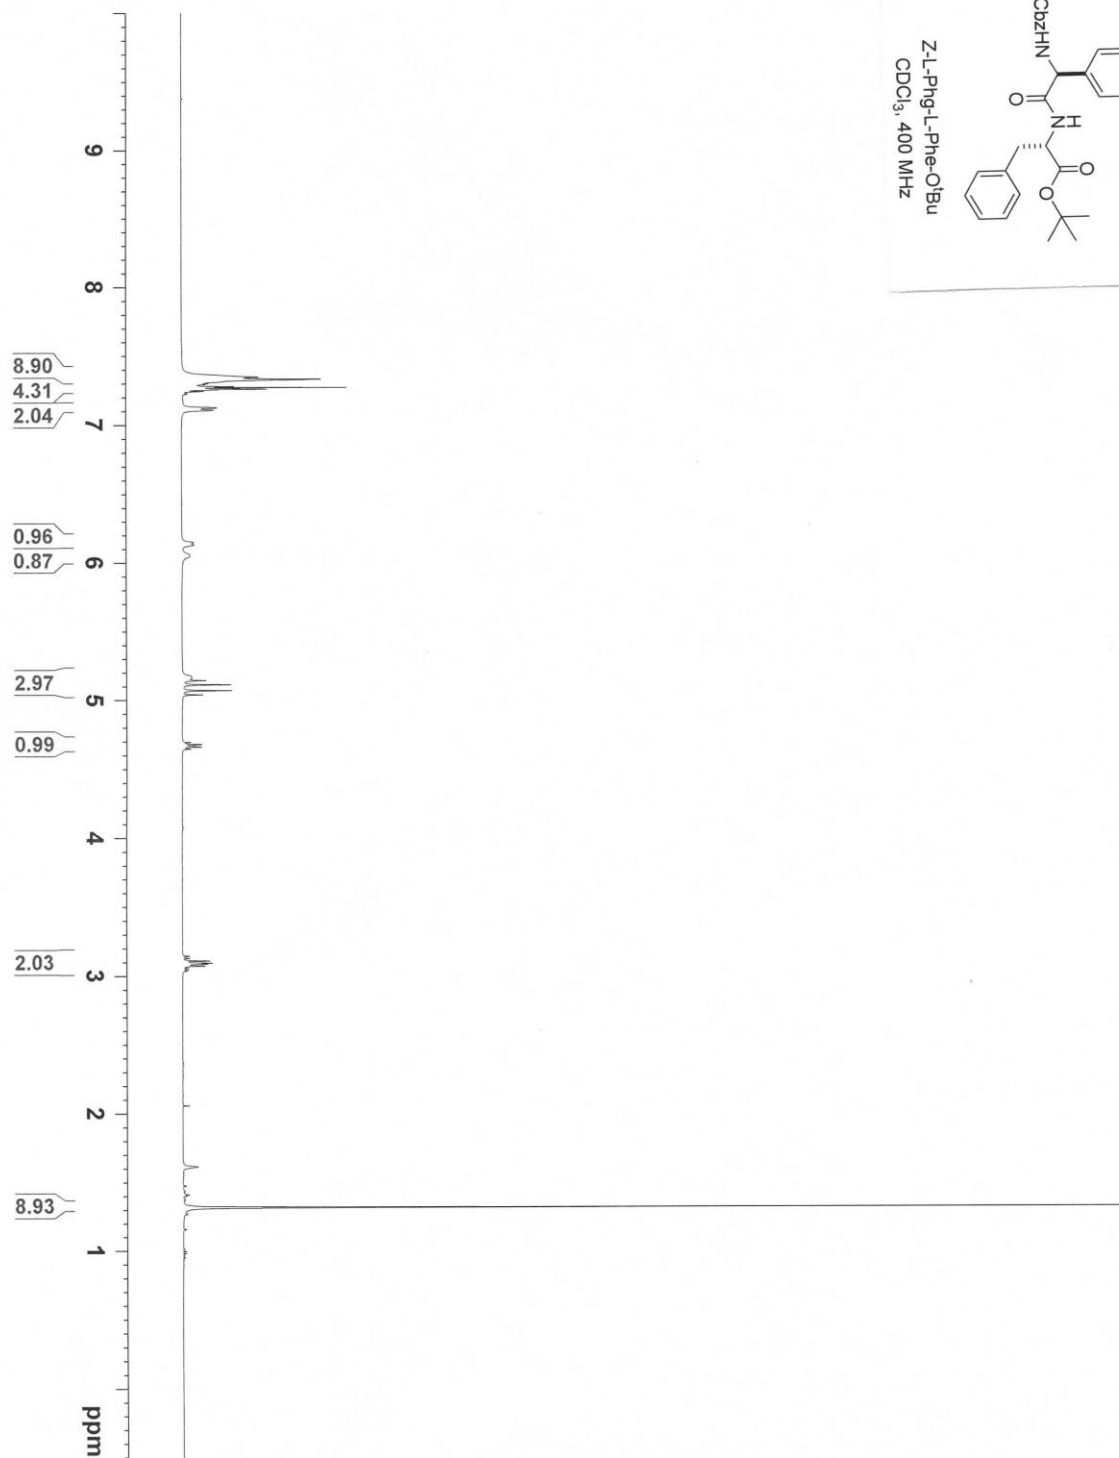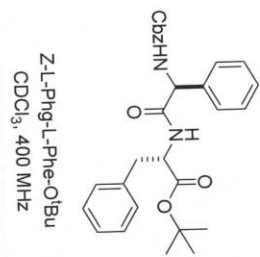

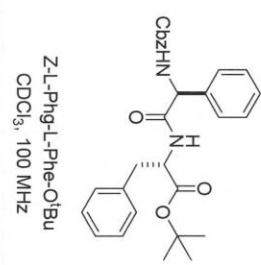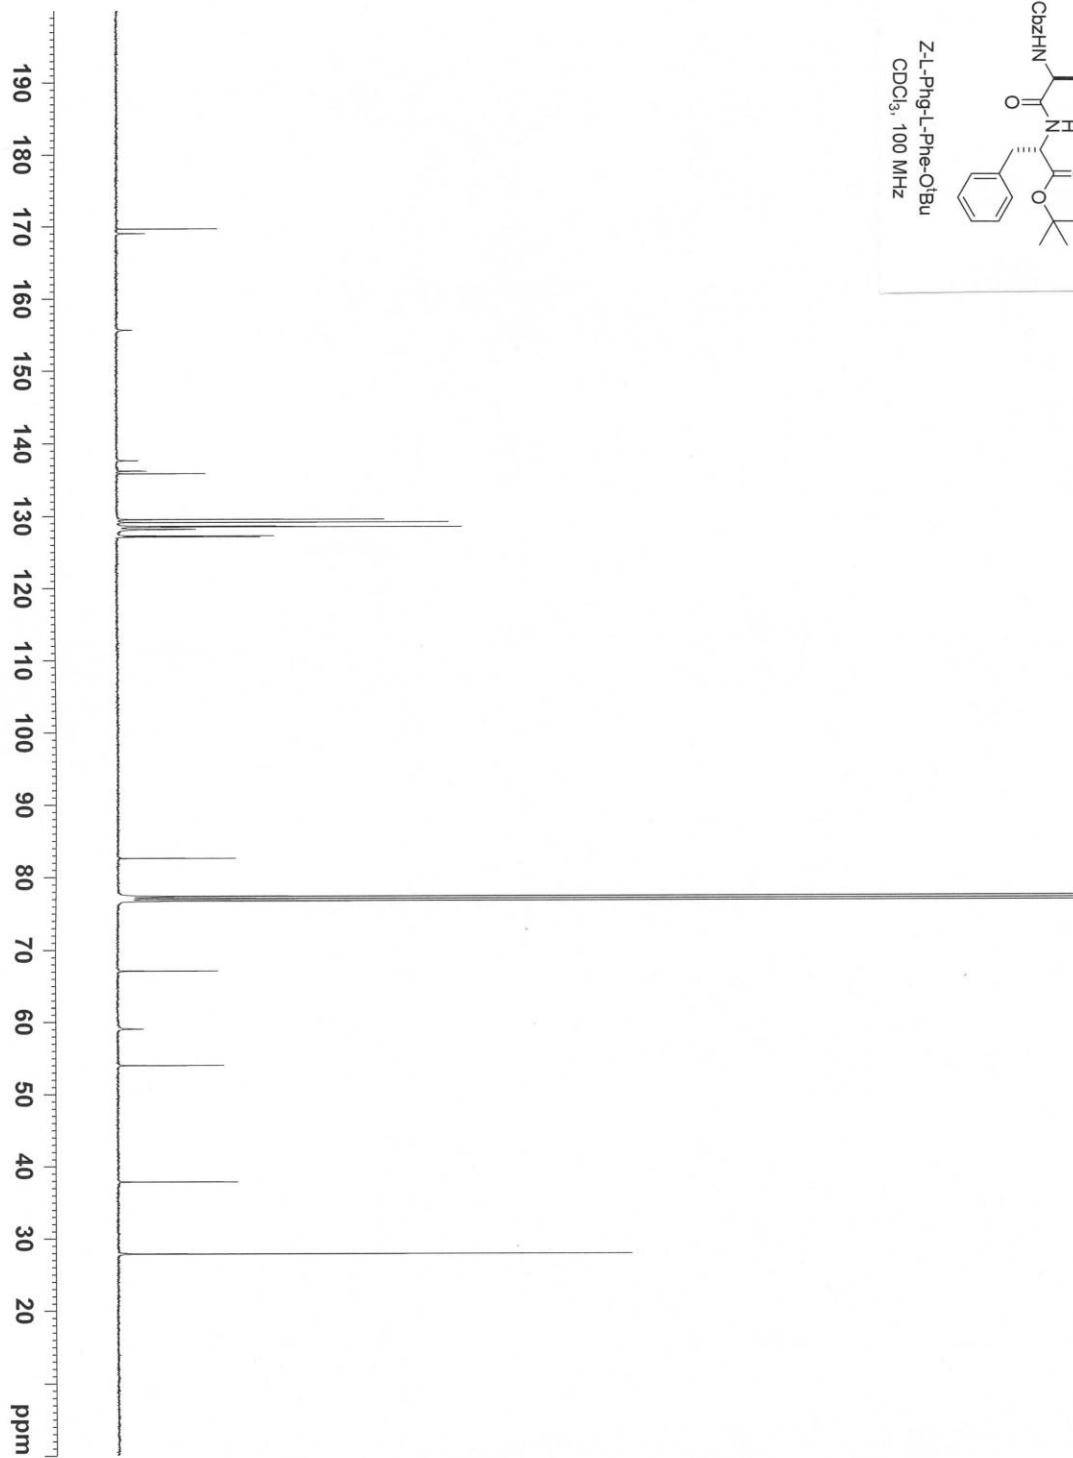

Z-D-Phg-L-Phe-O<sup>t</sup>Bu

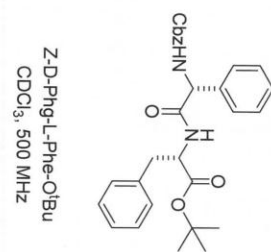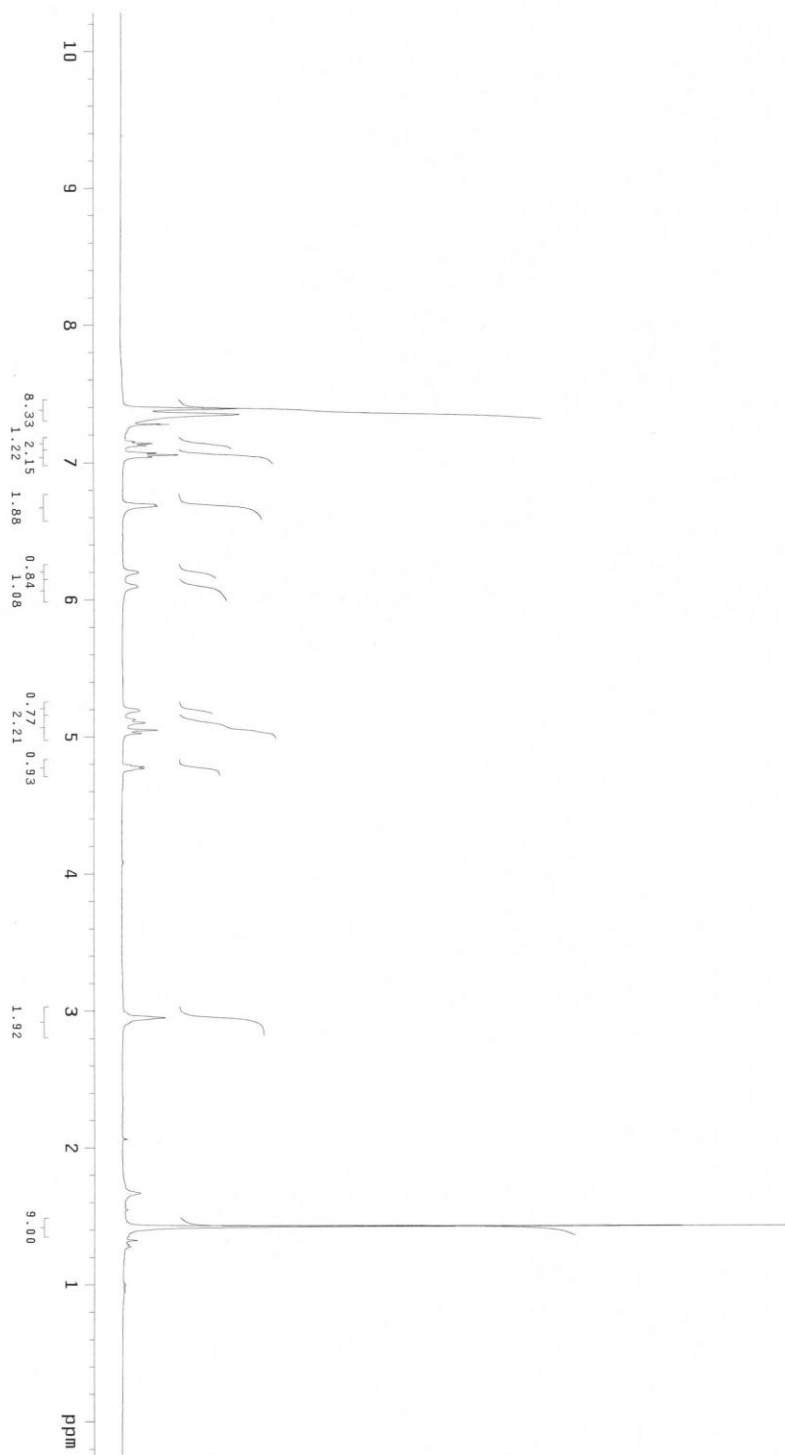

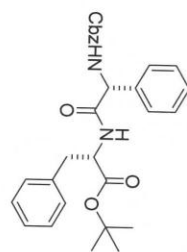

Z-D-Phe-L-Phe-O<sup>t</sup>Bu  
CDCl<sub>3</sub>, 125 MHz

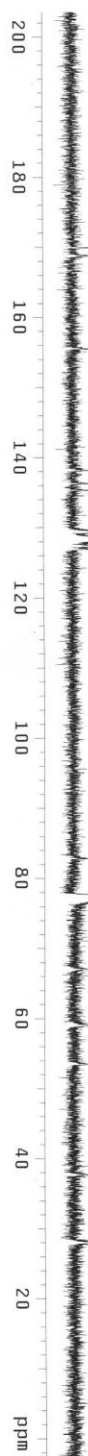

Z-L-Phg-L-Val-O<sup>t</sup>Bu

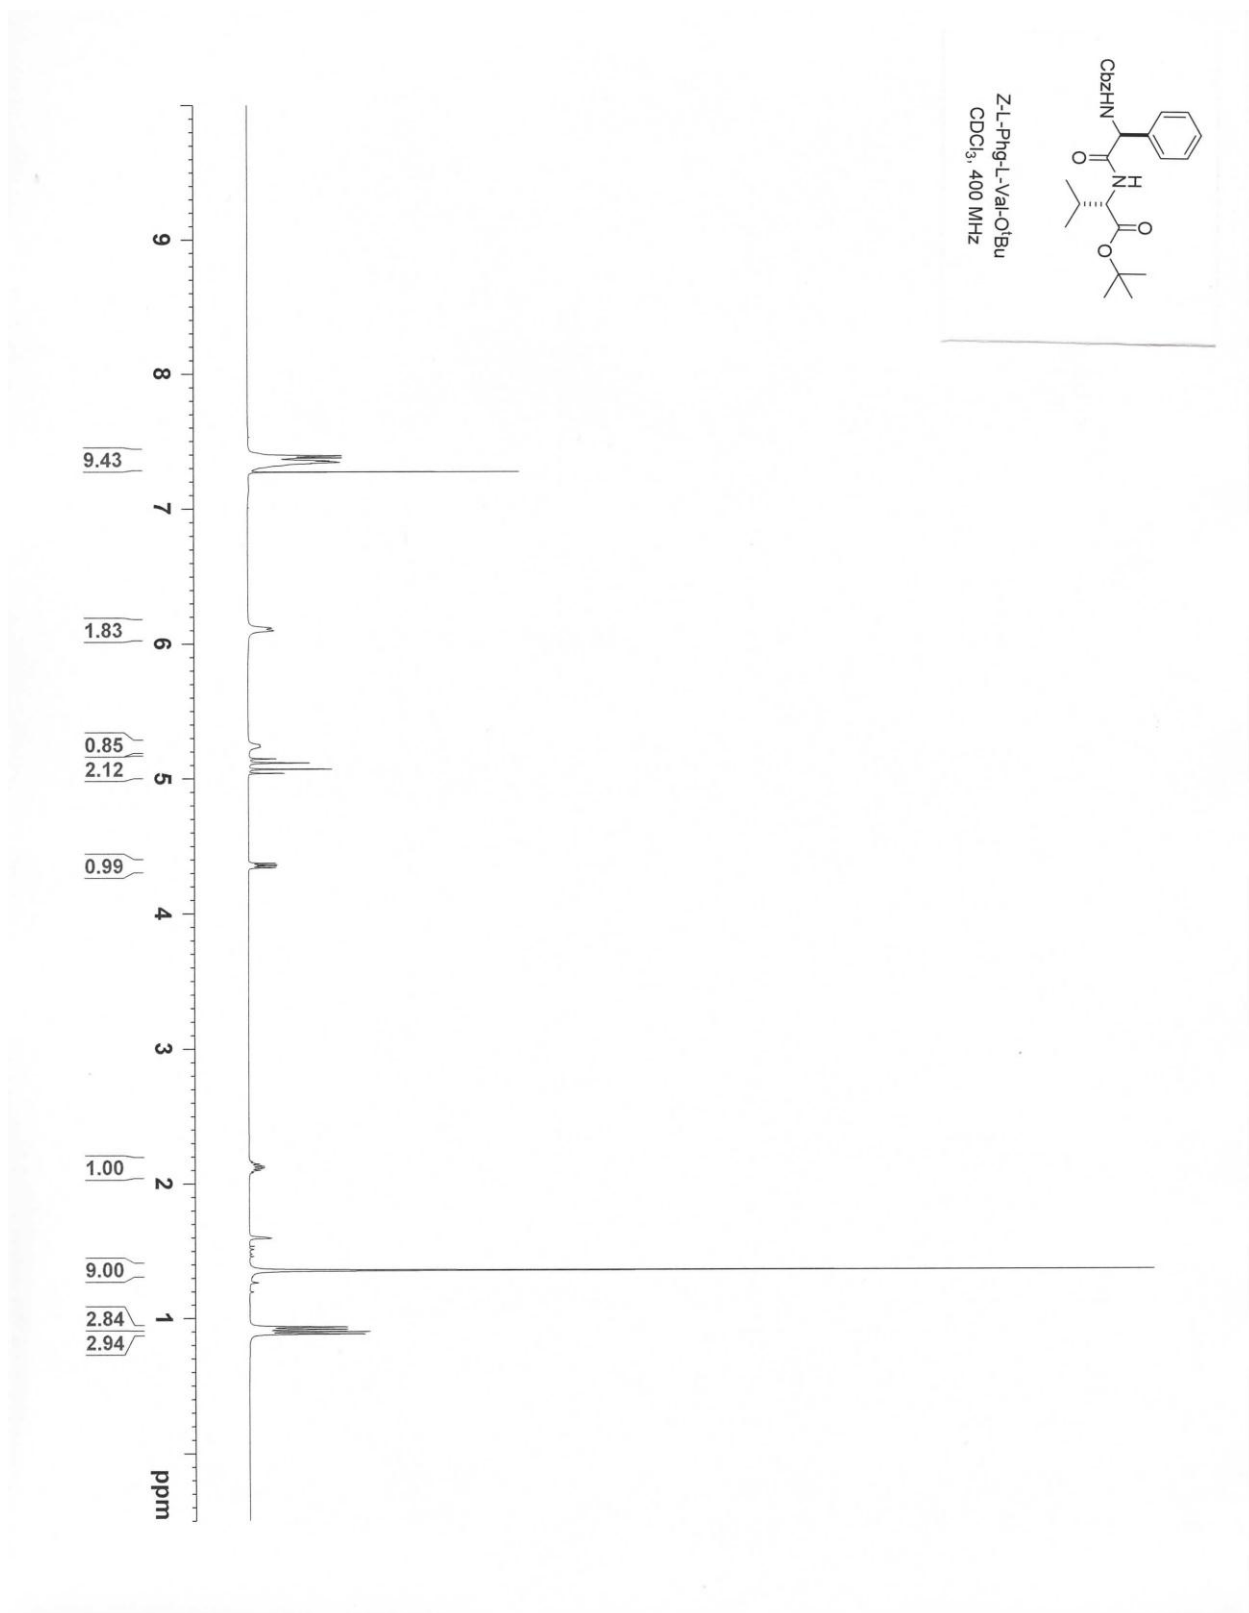



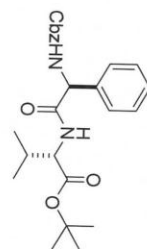

Z-L-Phe-L-Val-O<sup>t</sup>Bu  
CDCl<sub>3</sub>, 100 MHz

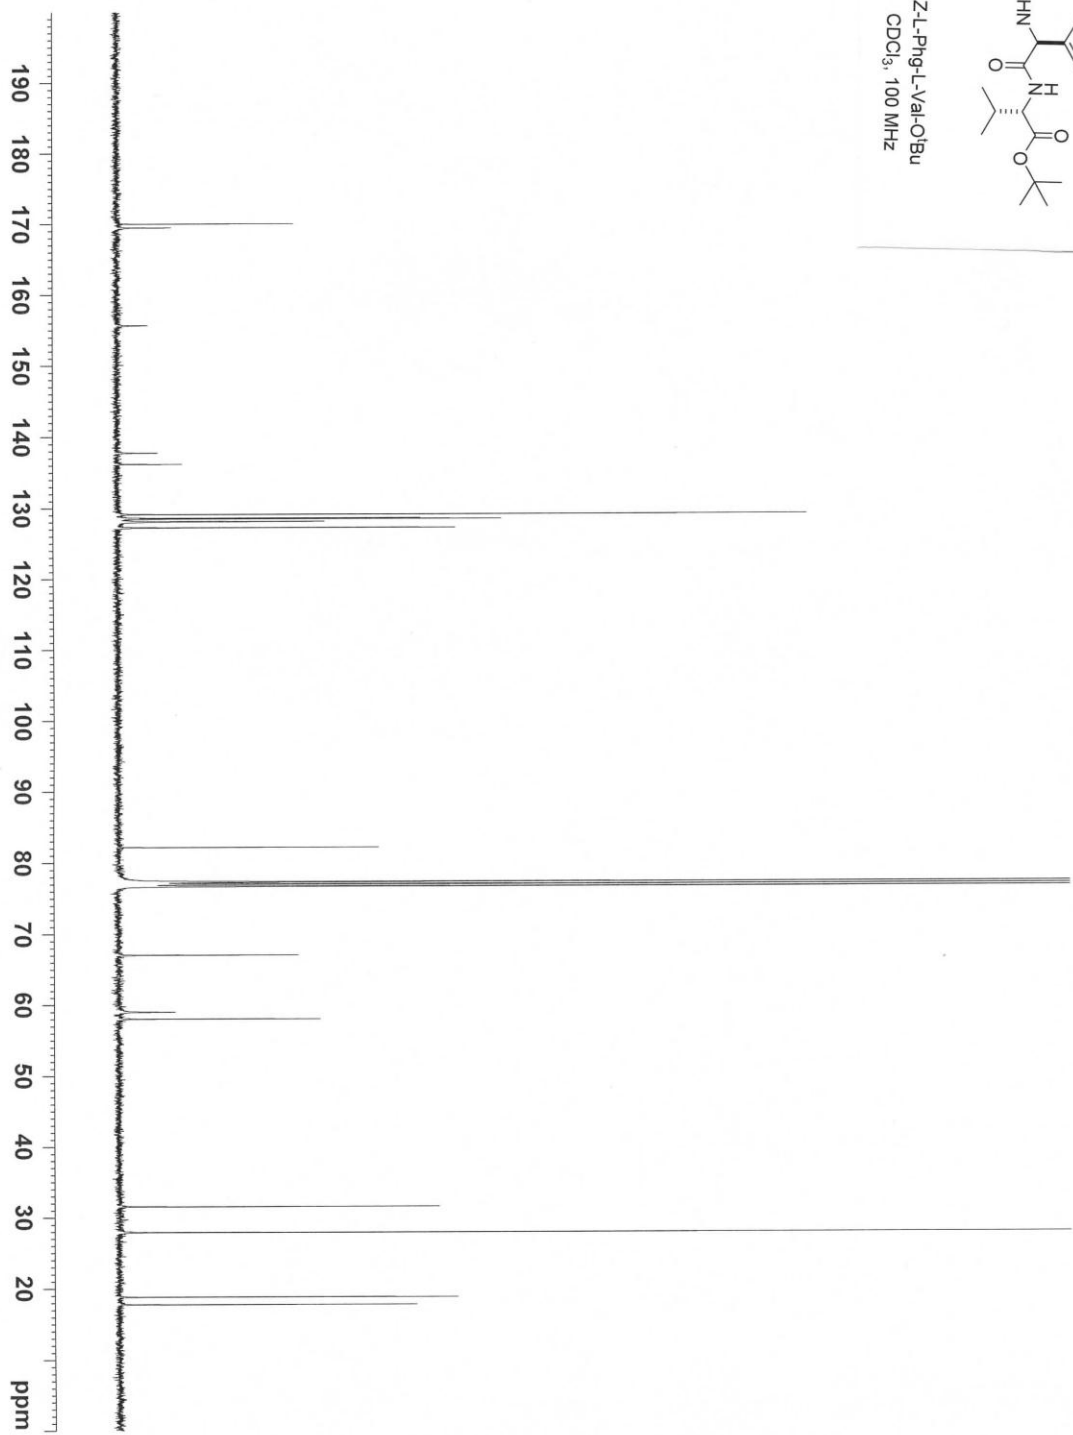

Z-L-Phg-L-Val-OMe

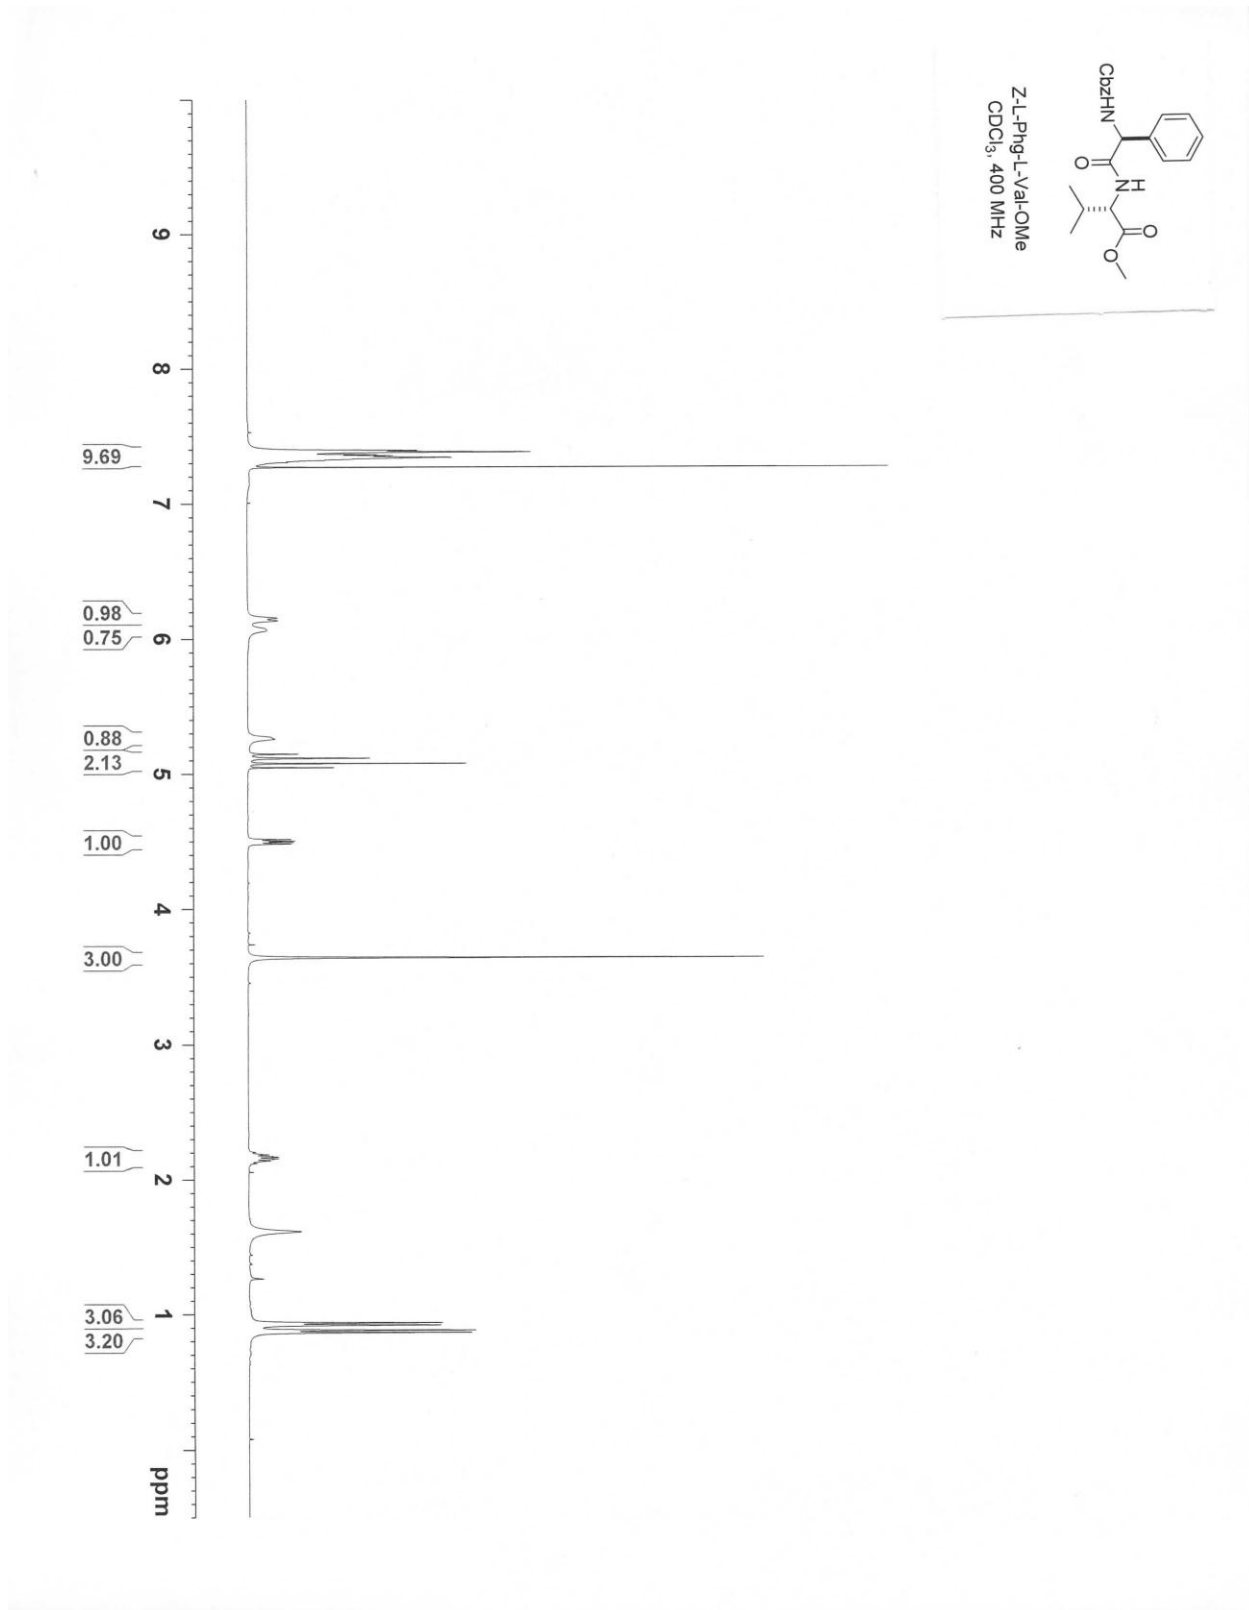

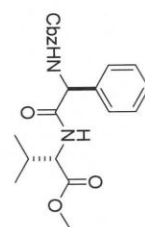

Z-L-Phg-L-Val-OMe  
CDCl<sub>3</sub>, 100 MHz

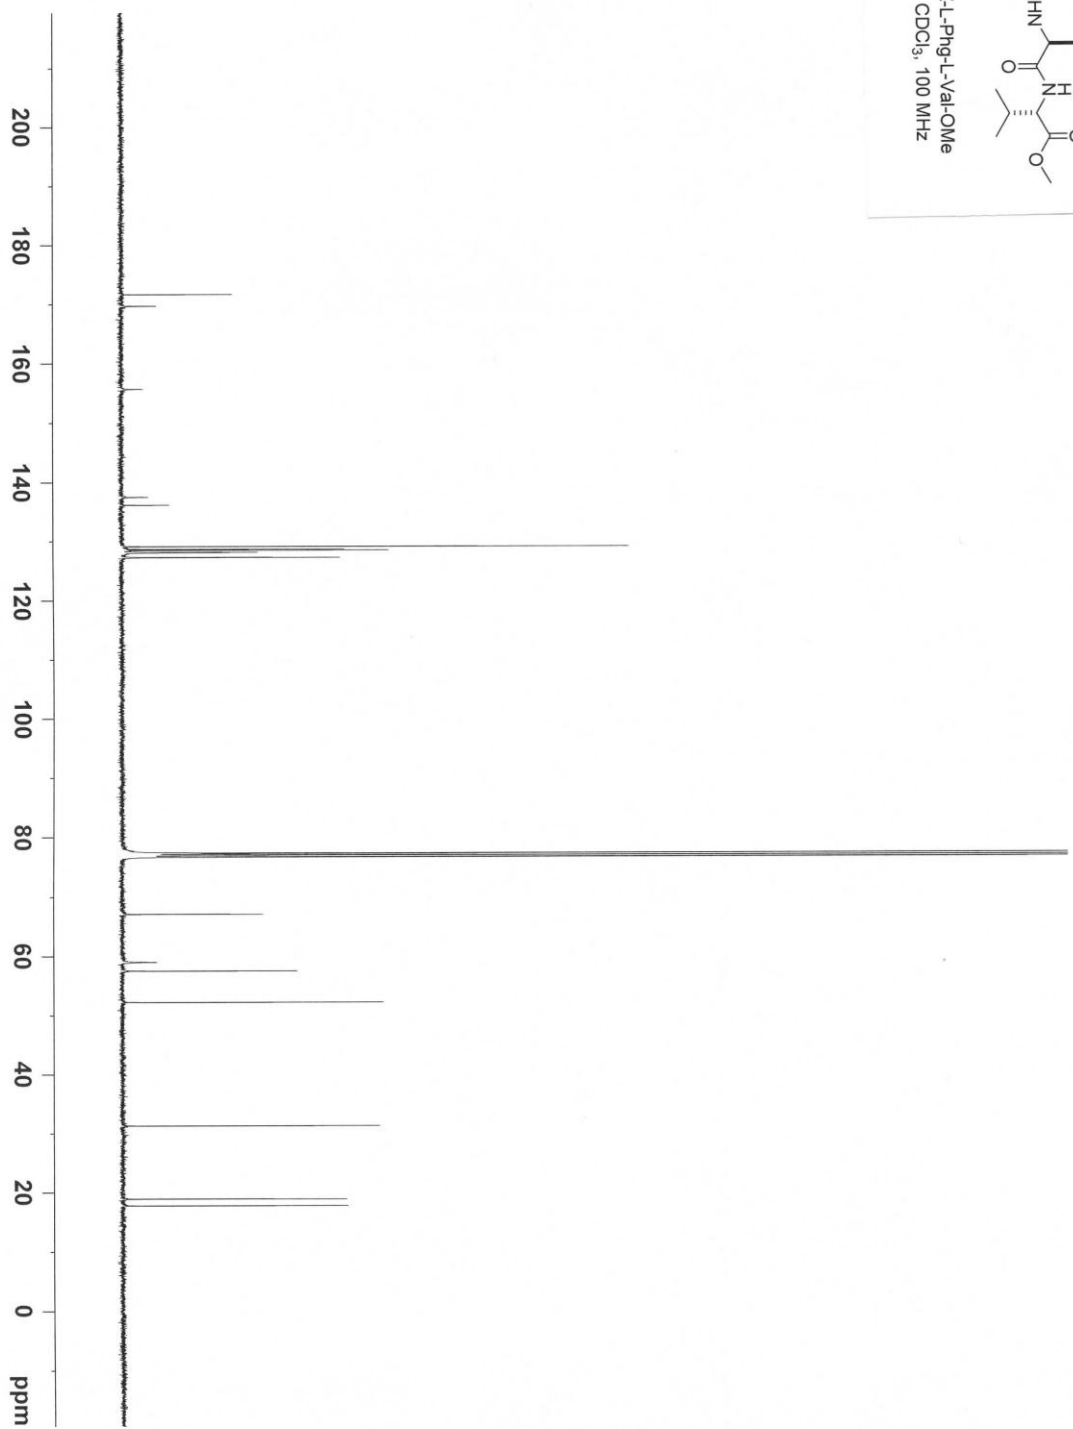

Boc-L-Thr-L-Ala-OMe

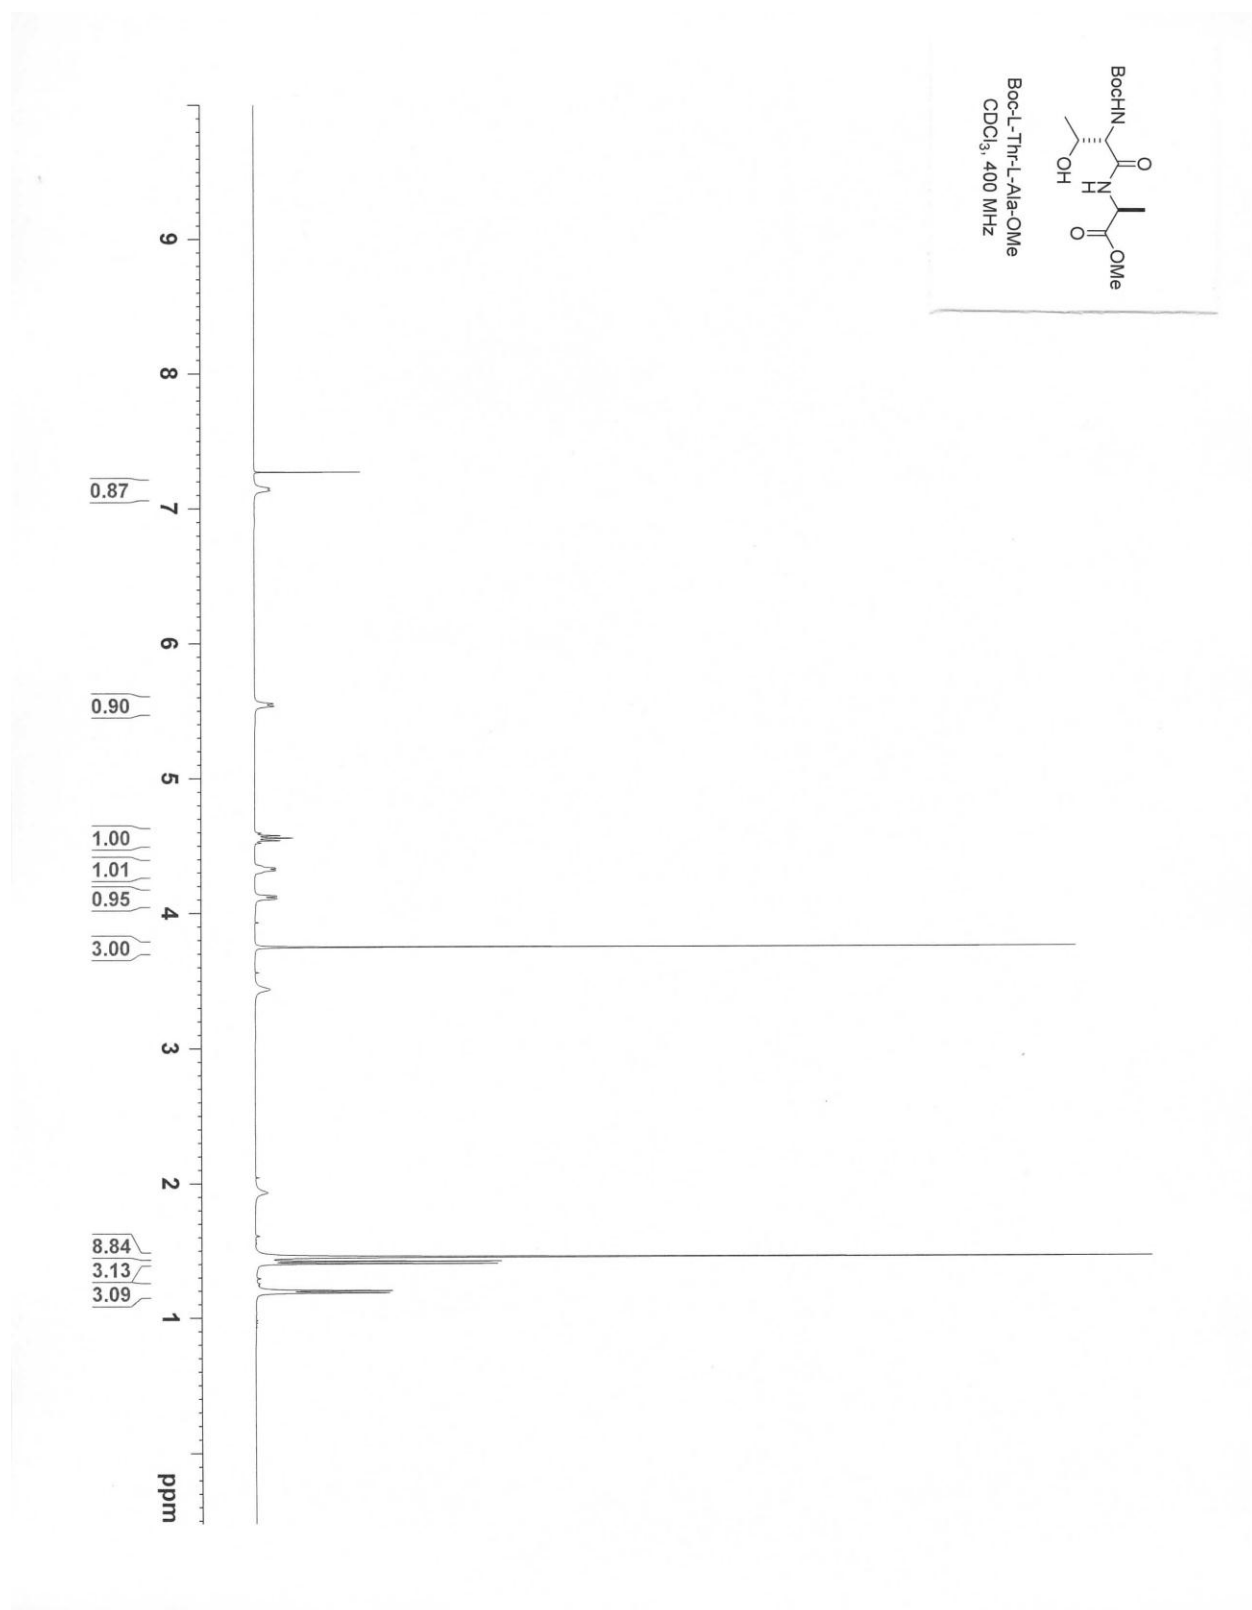

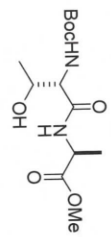

Boc-L-Thr-L-Ala-OMe  
CDCl<sub>3</sub>, 100 MHz

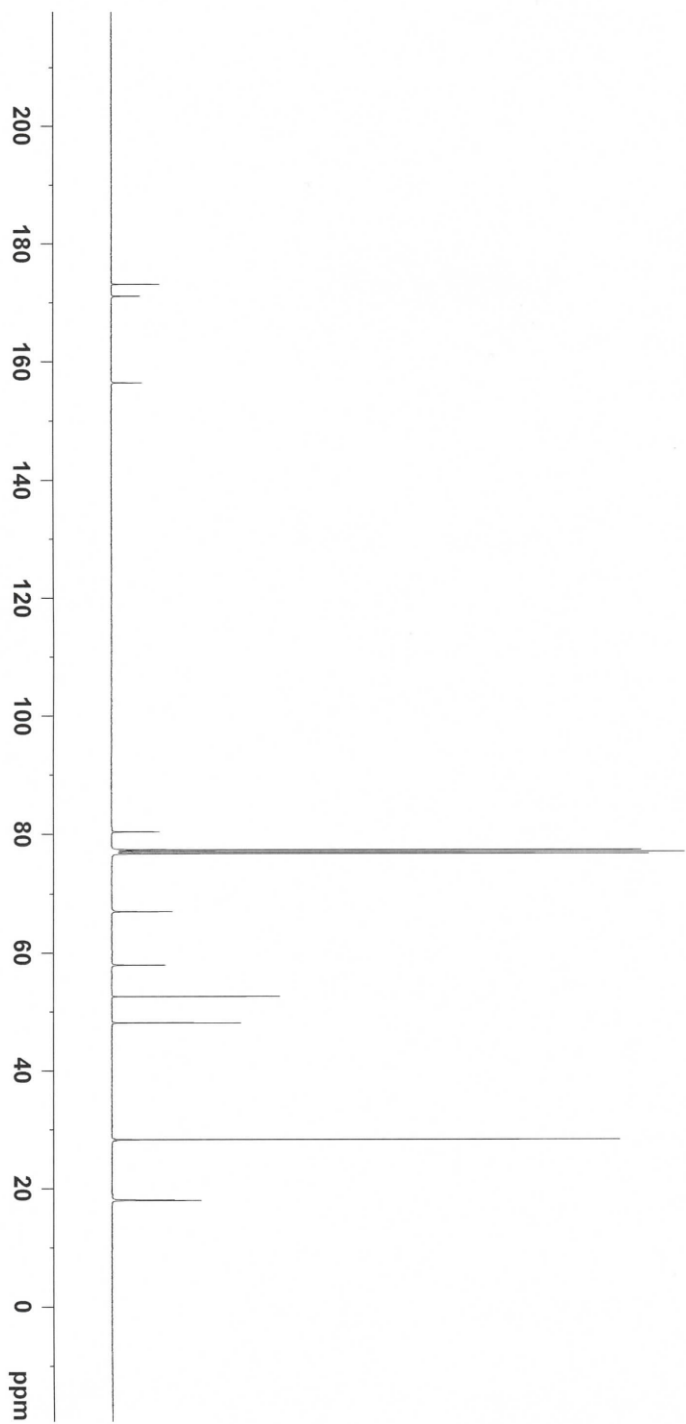

Boc-L-Ala-L-Phe-D-Val-OMe

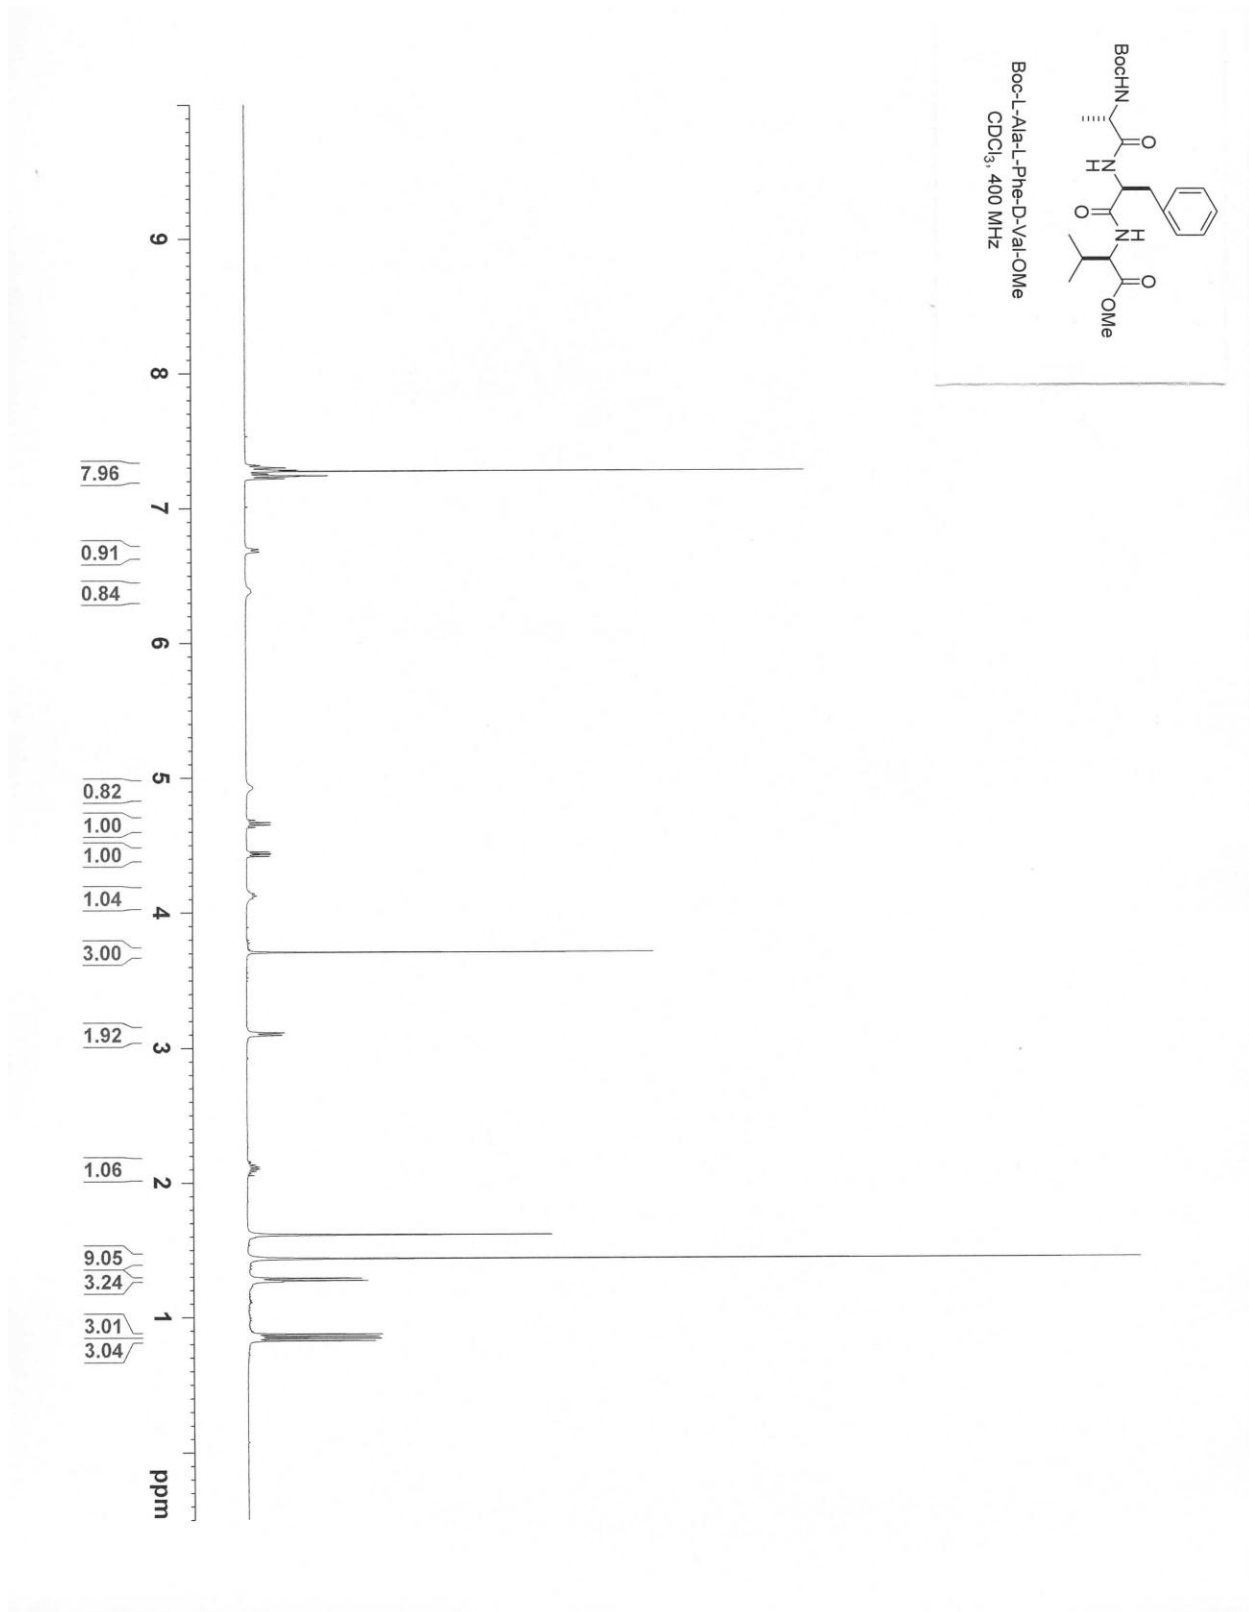

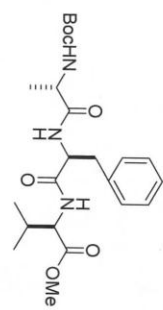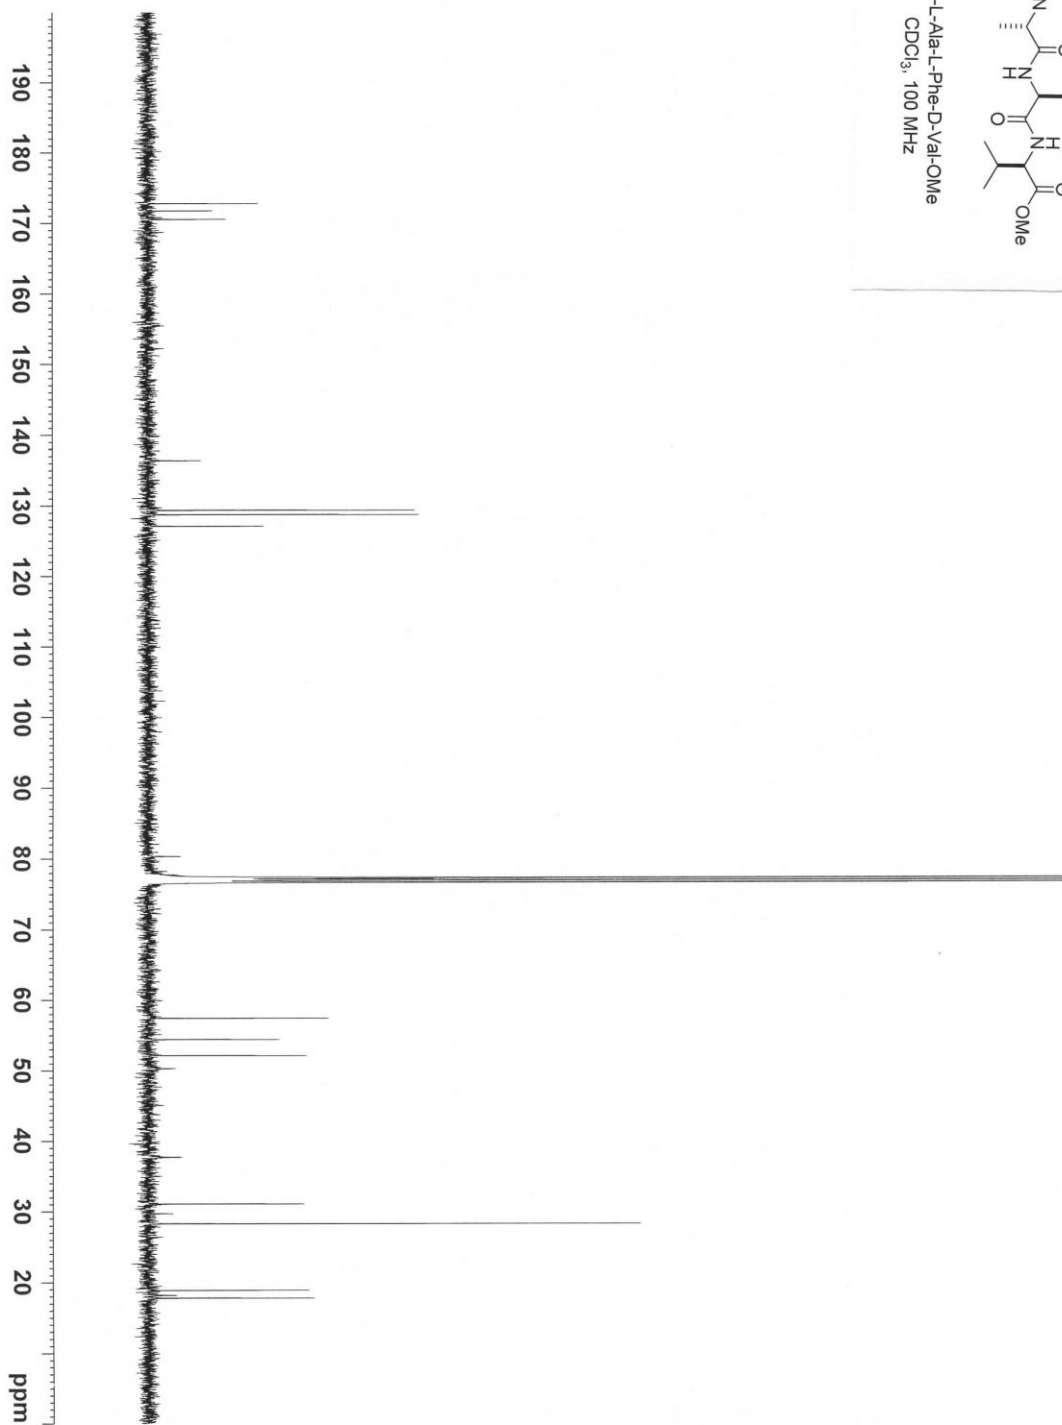

Boc-L-Ala-L-Phe-D-Ala-OMe

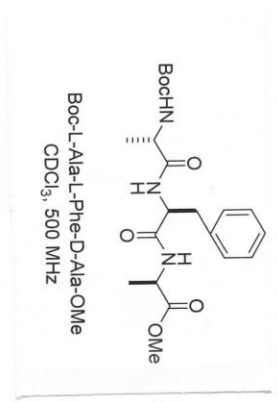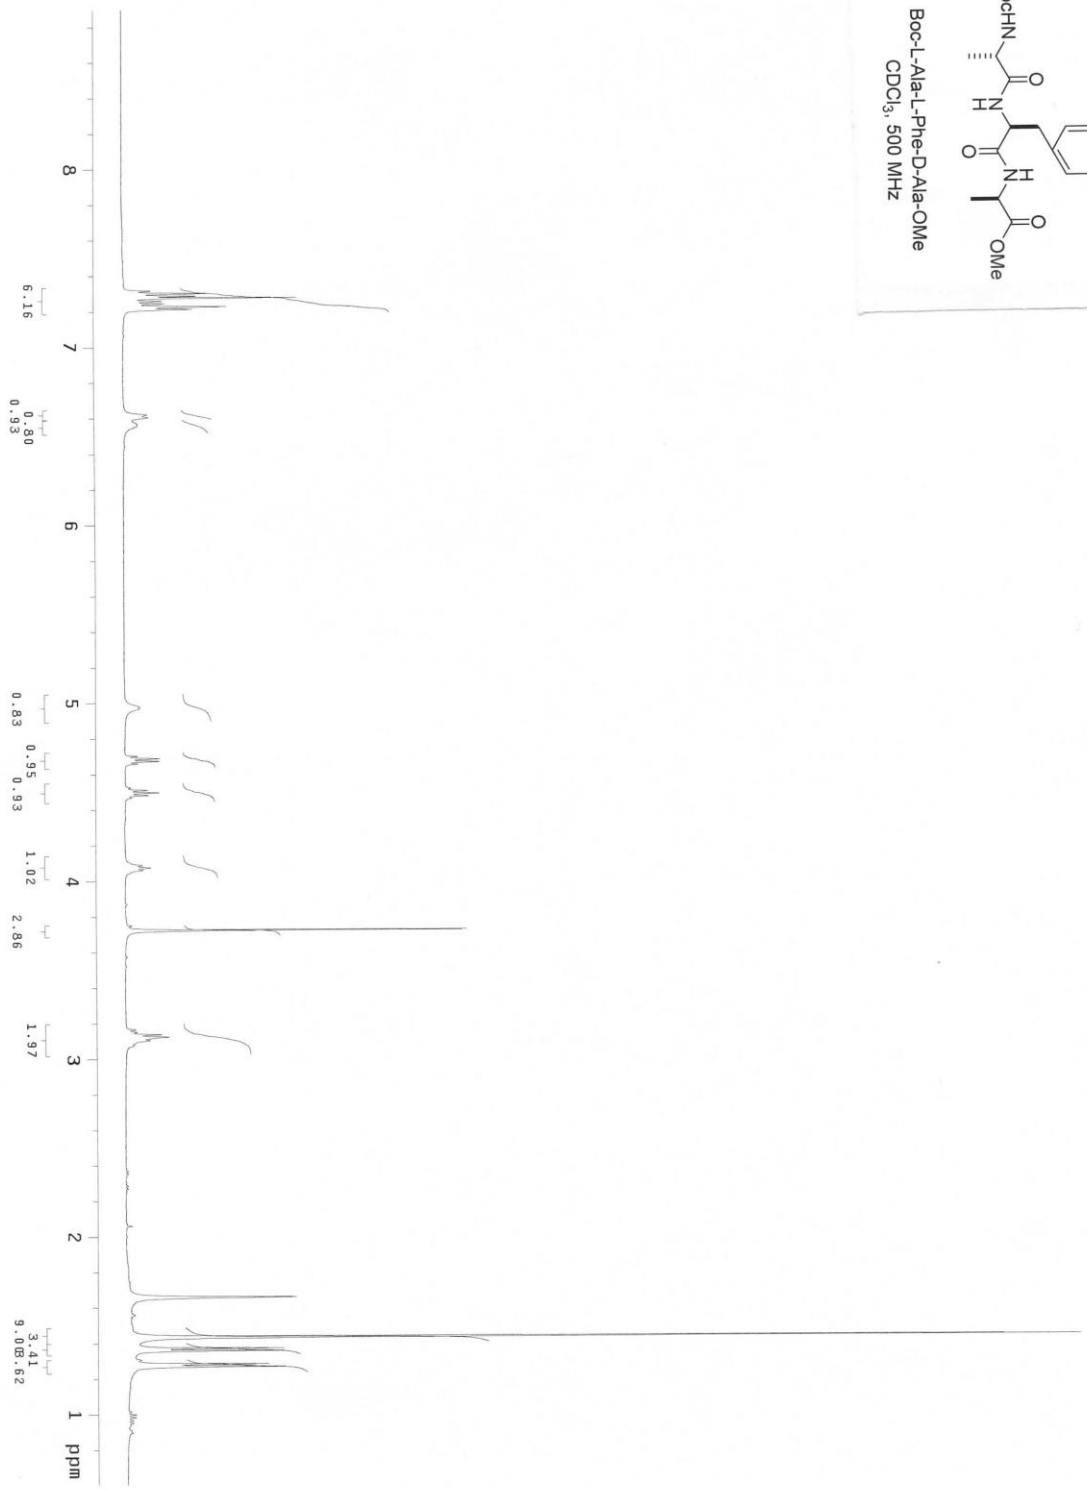



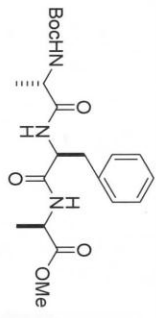

Boc-L-Ala-L-Phe-D-Ala-OMe  
CDCl<sub>3</sub>, 125 MHz

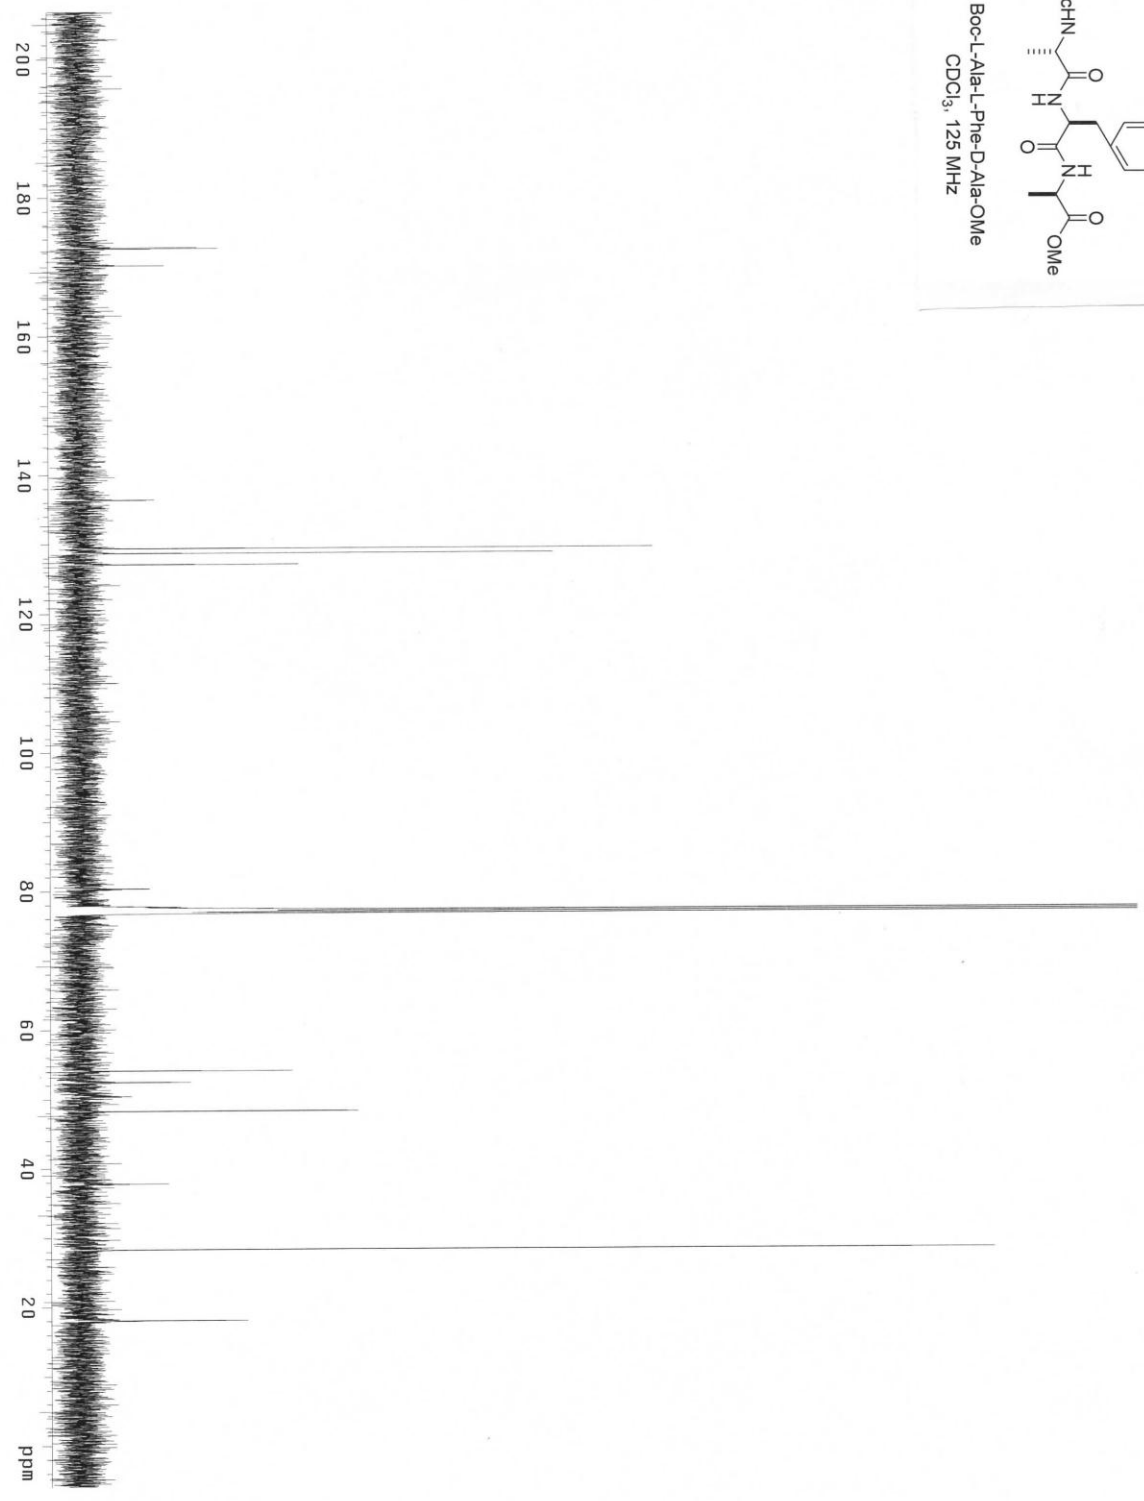

Boc-L-Tyr-L-Ala-OMe

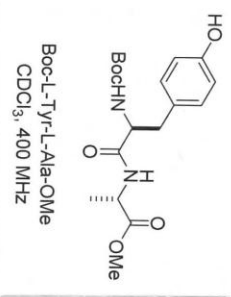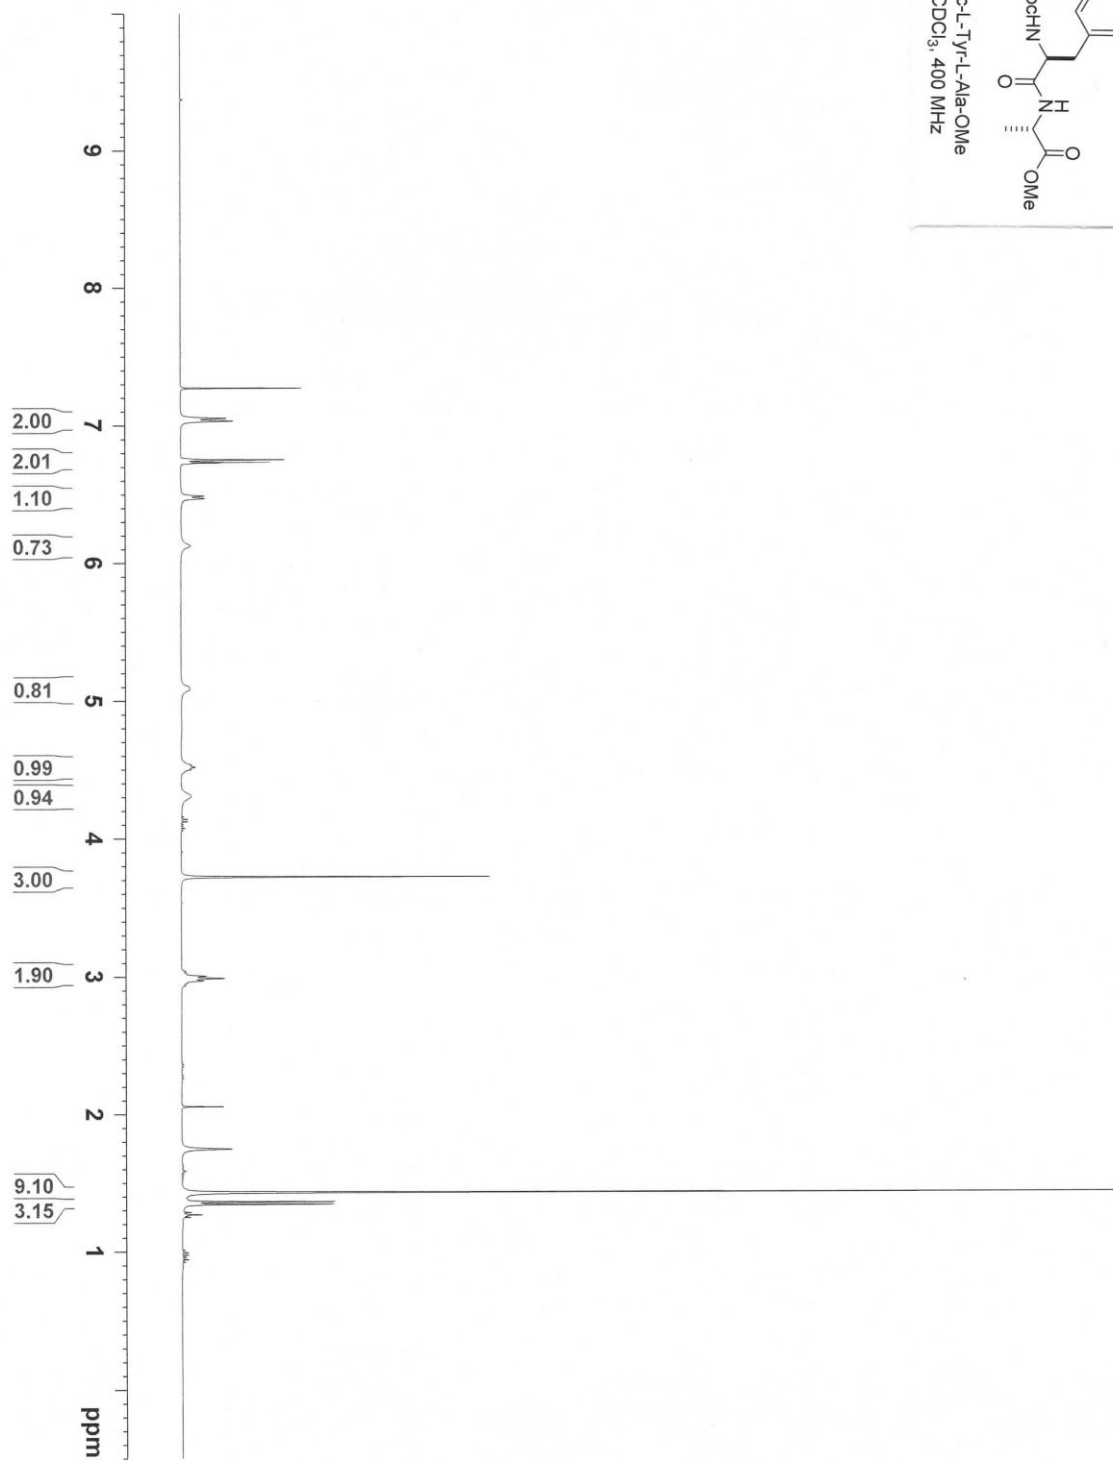

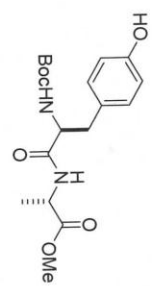

Boc-L-Tyr-L-Ala-OMe  
CDCl<sub>3</sub>, 100 MHz

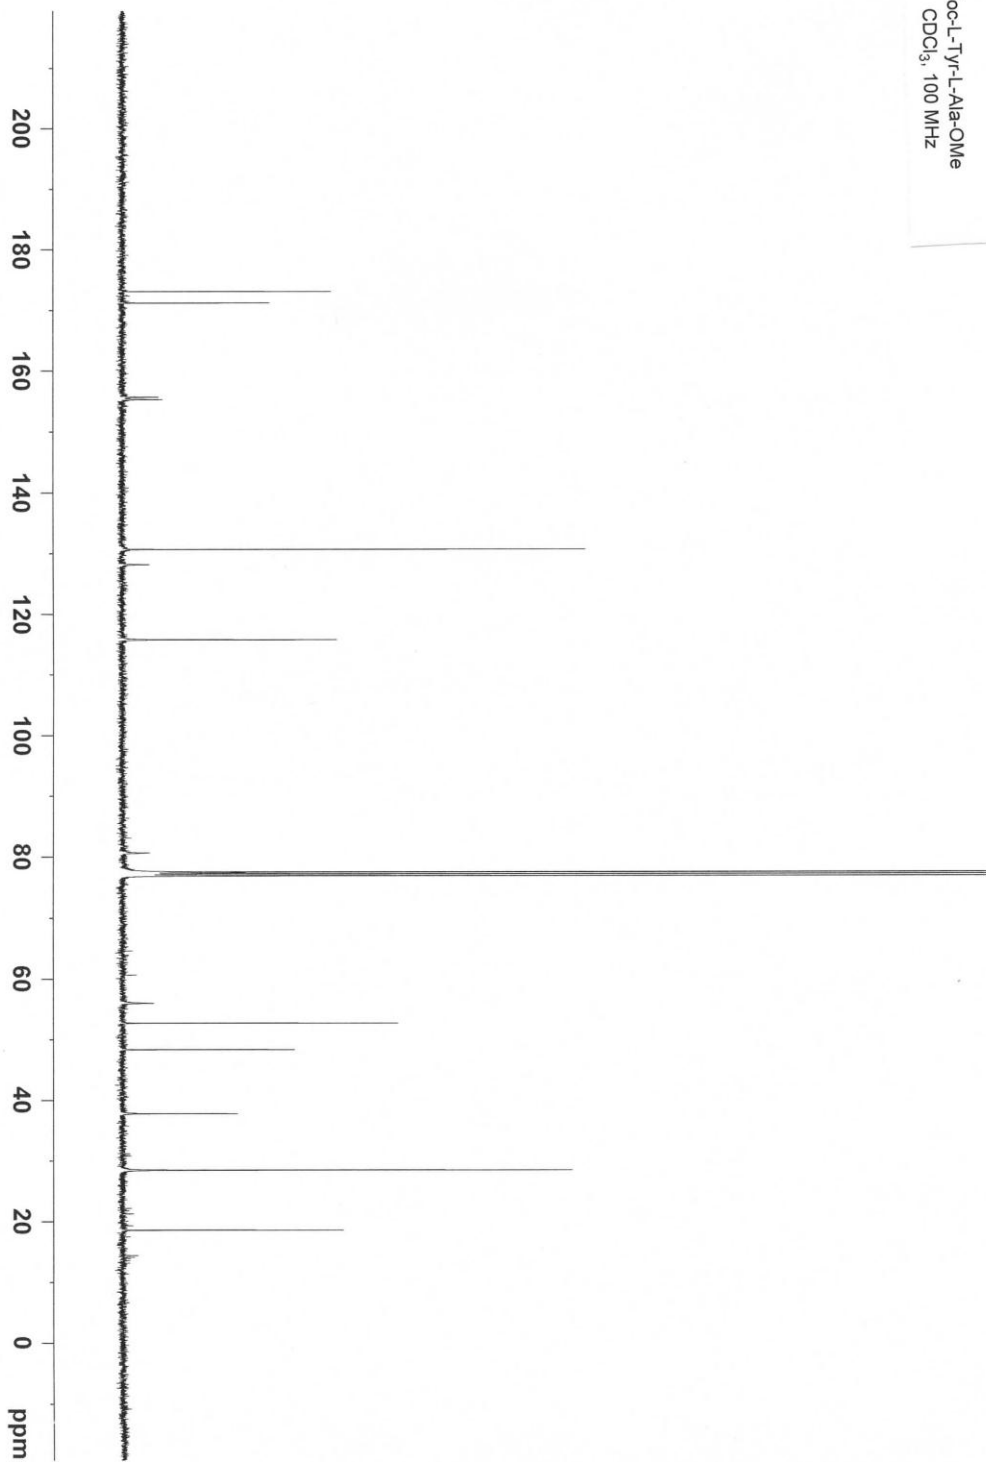

Boc-L-Tyr-L-Sar-OMe

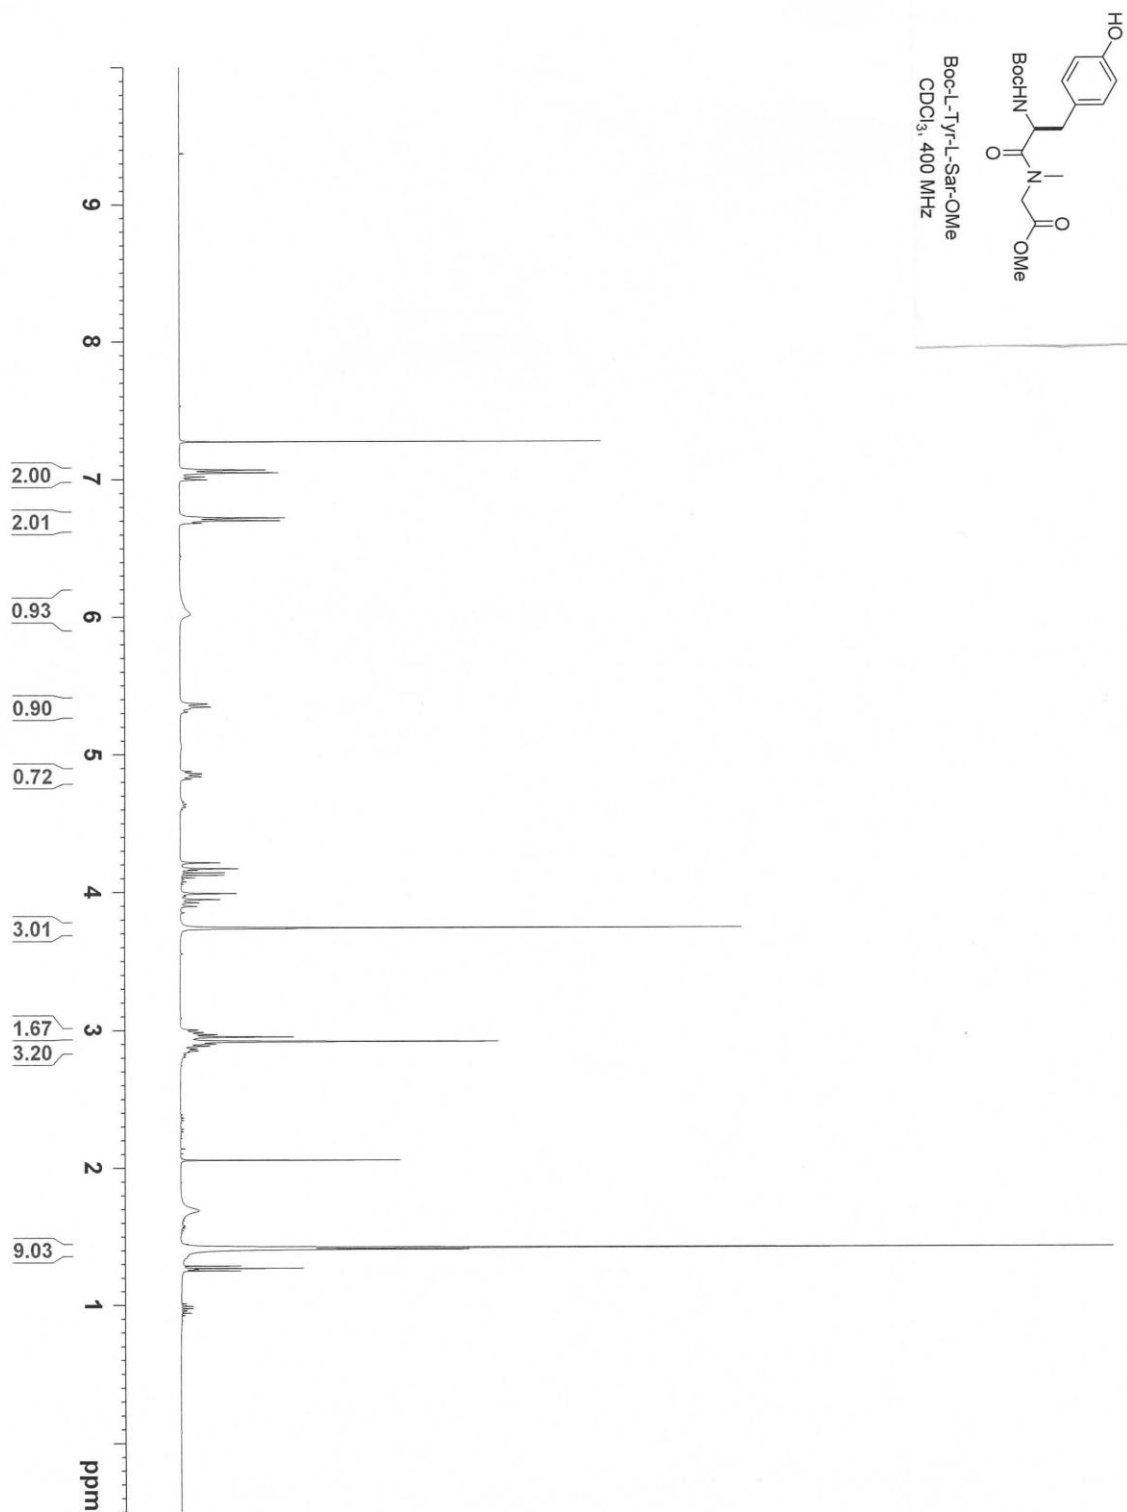

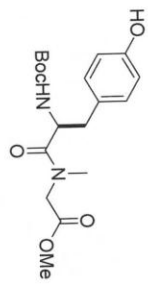

Boc-L-Tyr-L-Sar-OMe  
CDCl<sub>3</sub>, 100 MHz

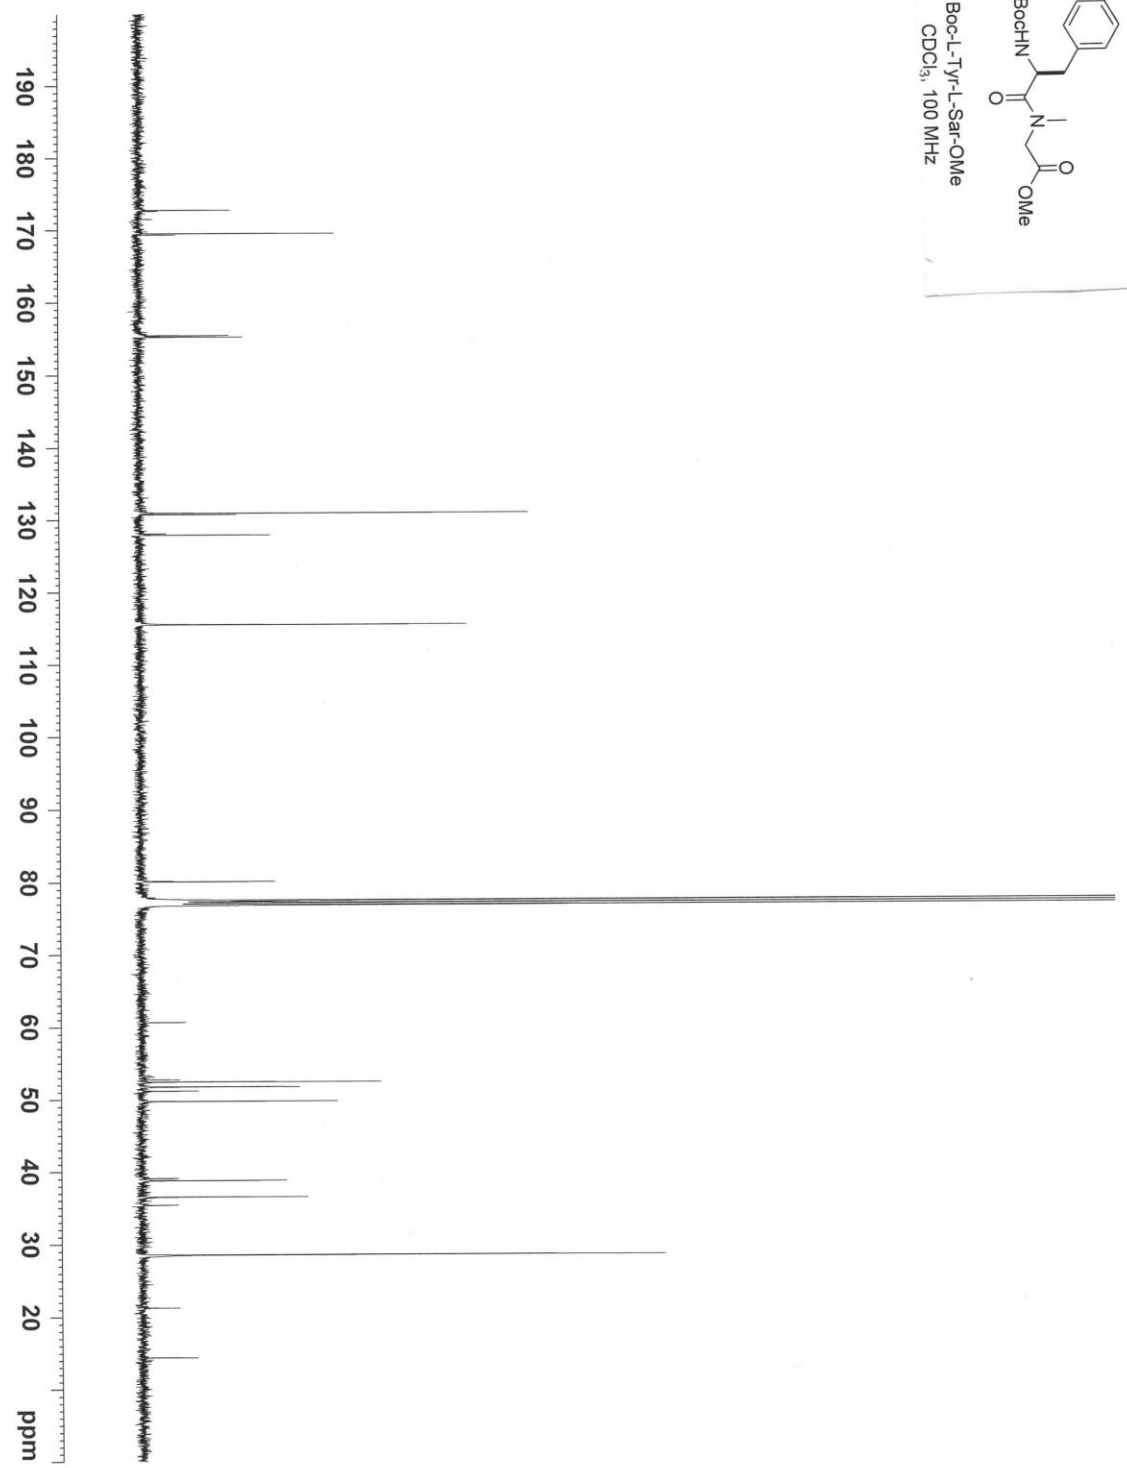

Ac-L-Phe-L-Ala-OMe

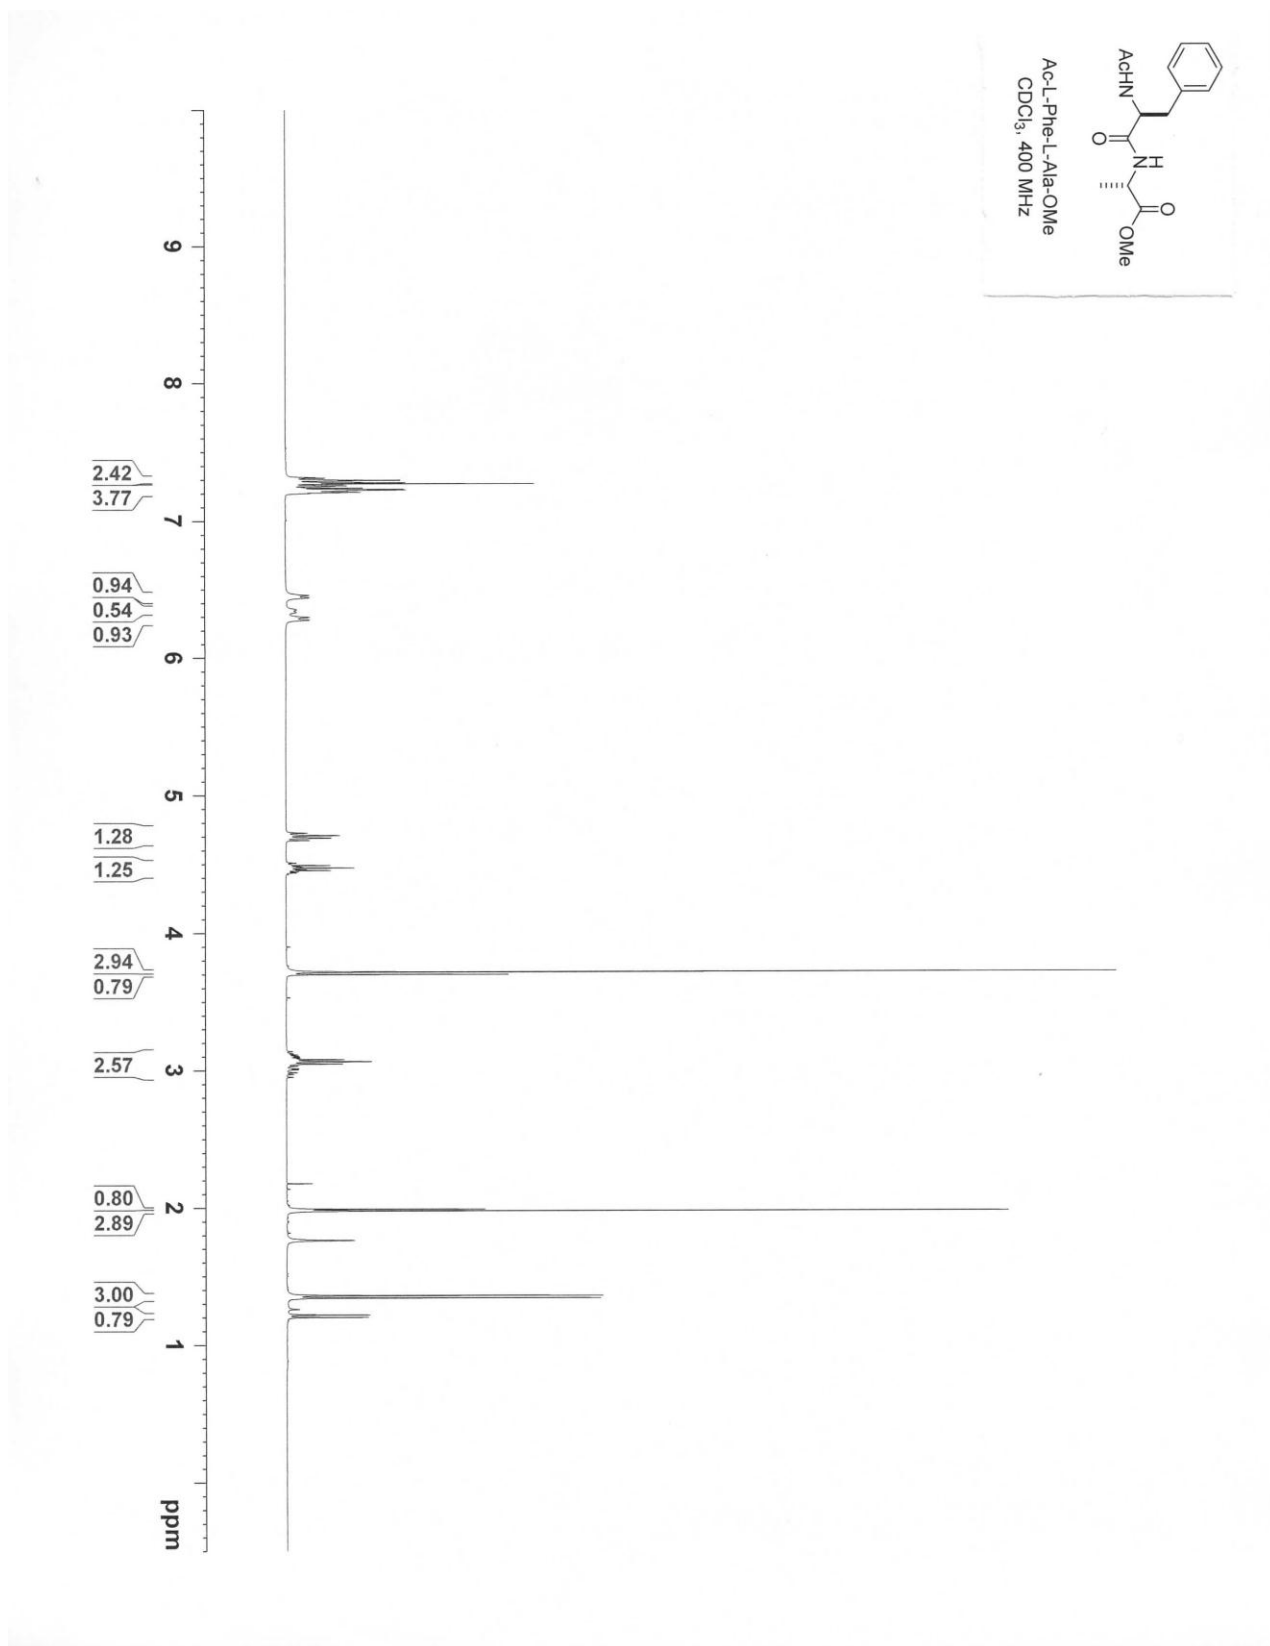

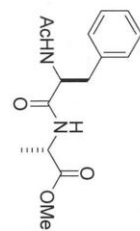

Ac-L-Phe-L-Ala-OMe  
CDCl<sub>3</sub>, 100 MHz

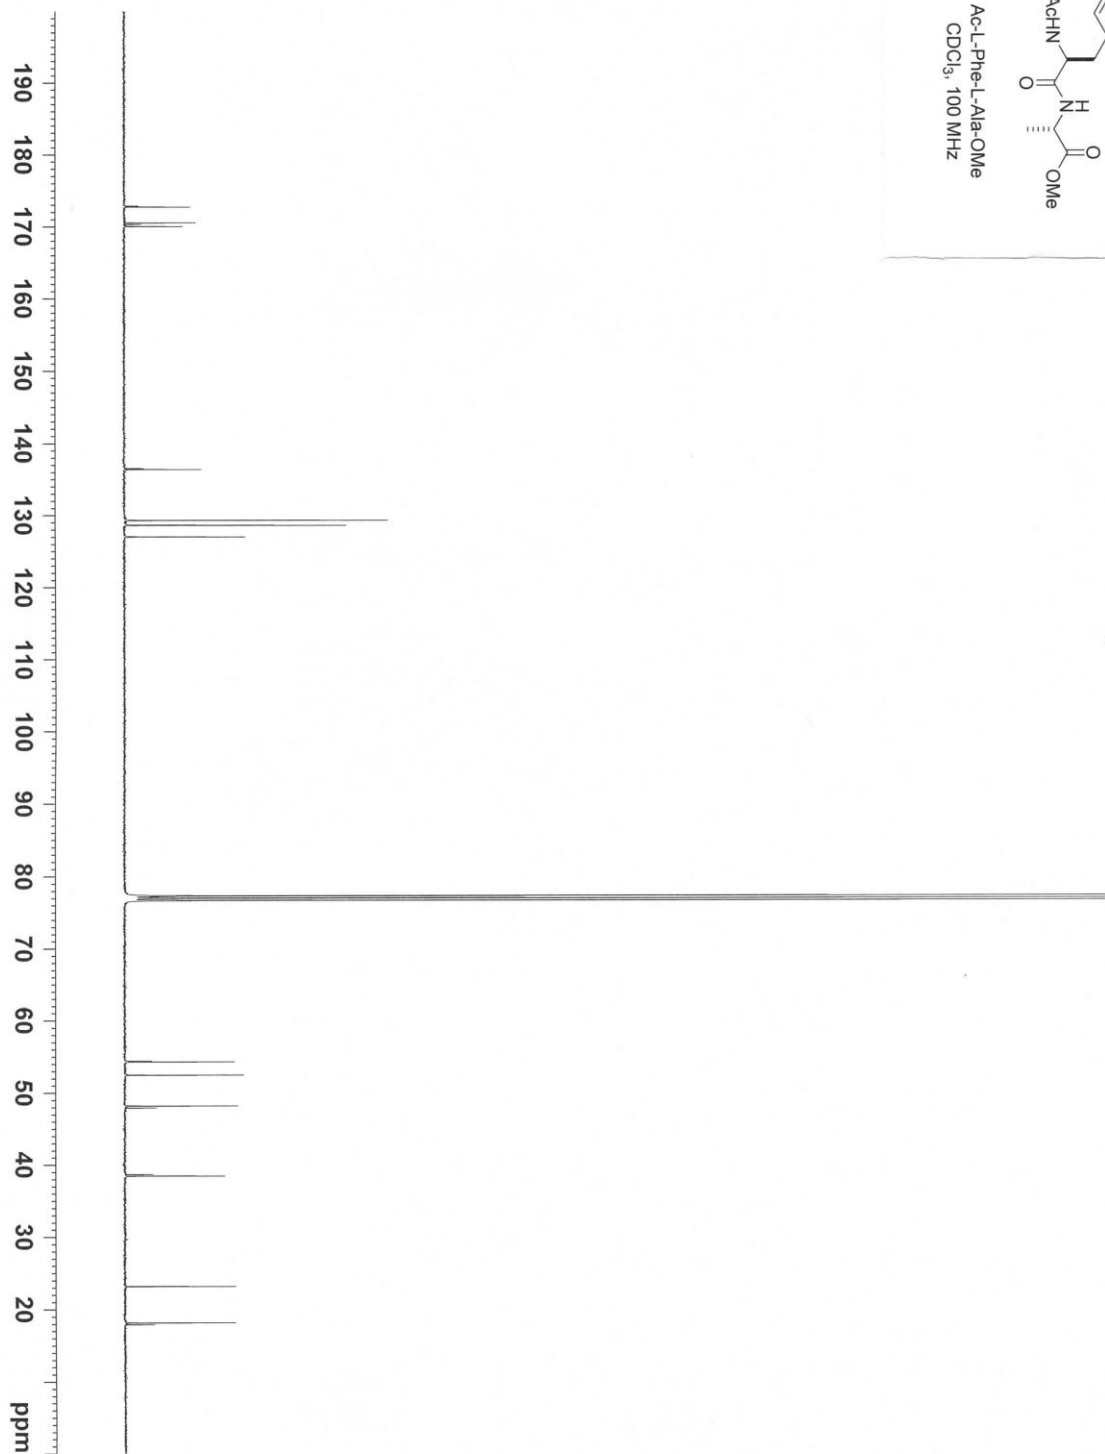

Ac-L-Tyr-L-Ala-OMe

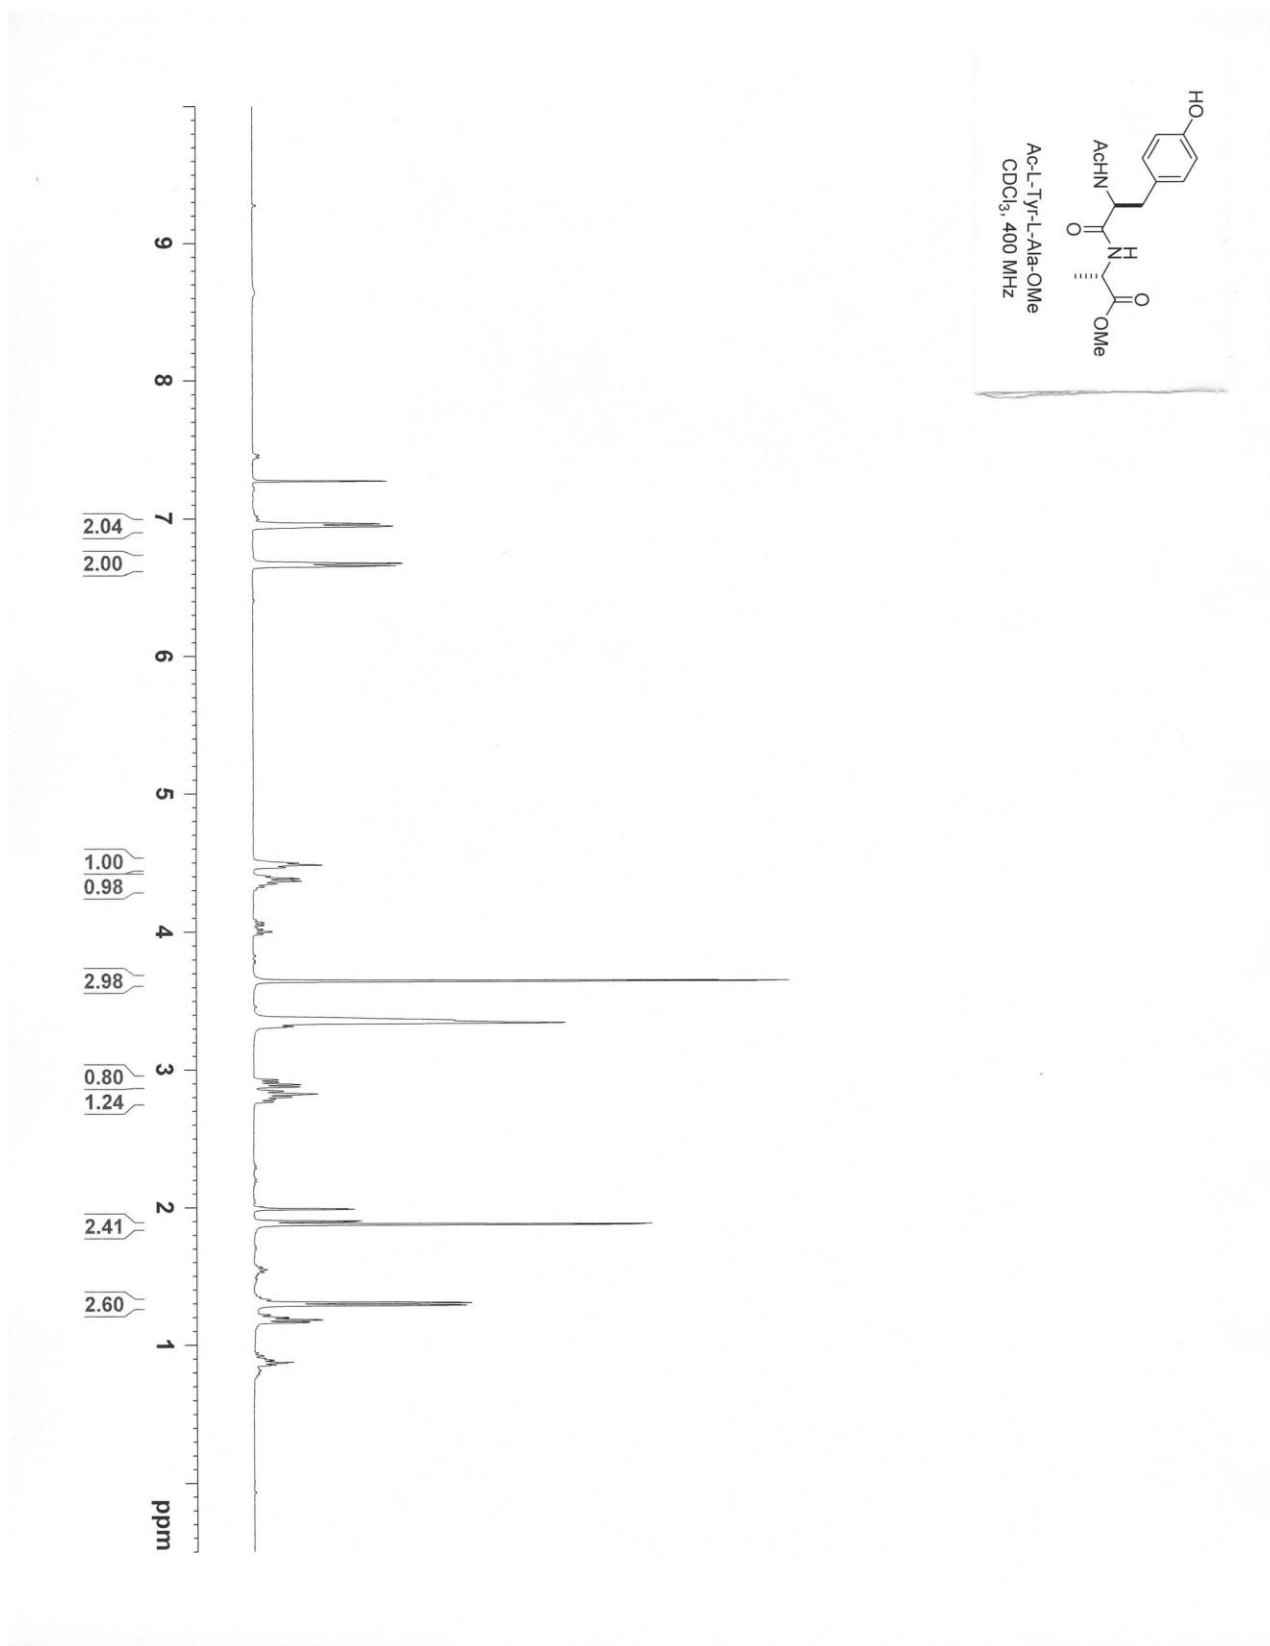



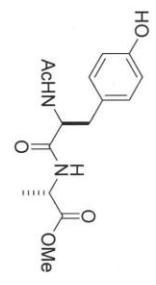

Ac-L-Tyr-L-Ala-OMe  
CDCl<sub>3</sub>, 100 MHz

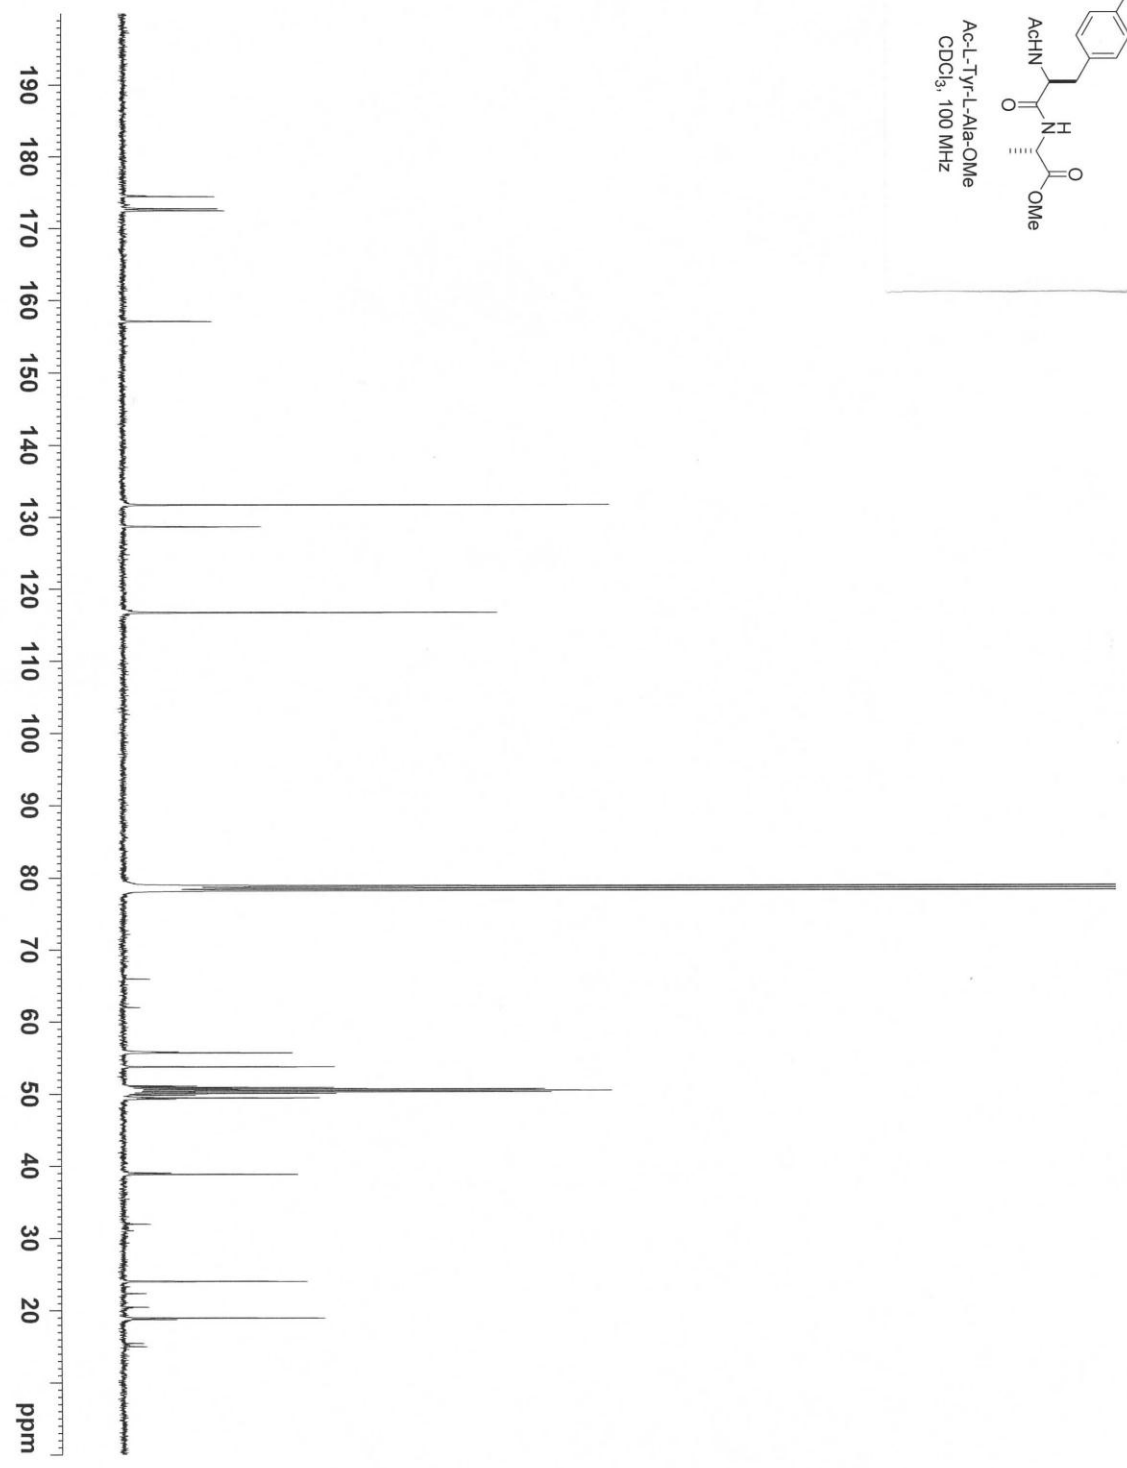

Boc-L-Tyr-L-Pro-OMe

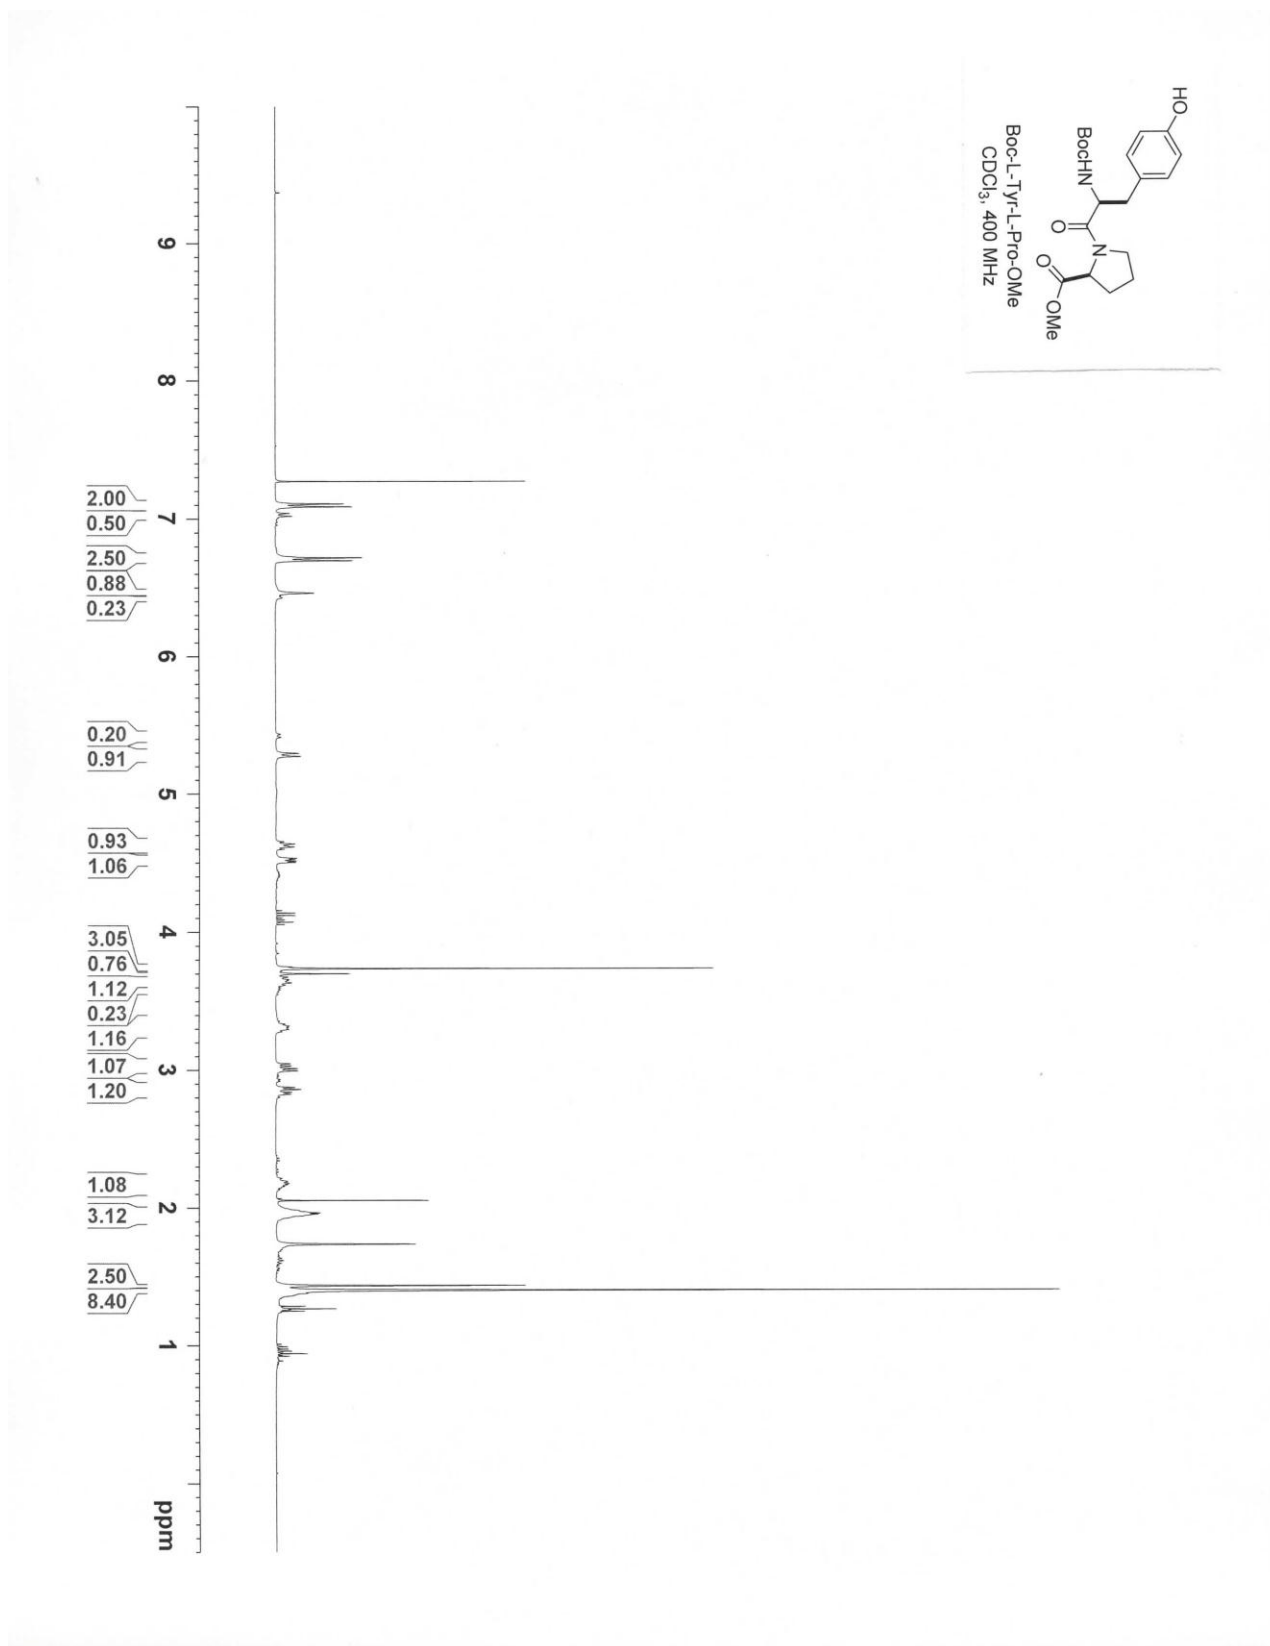

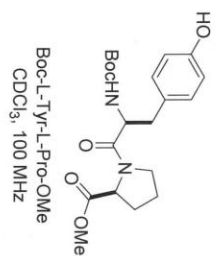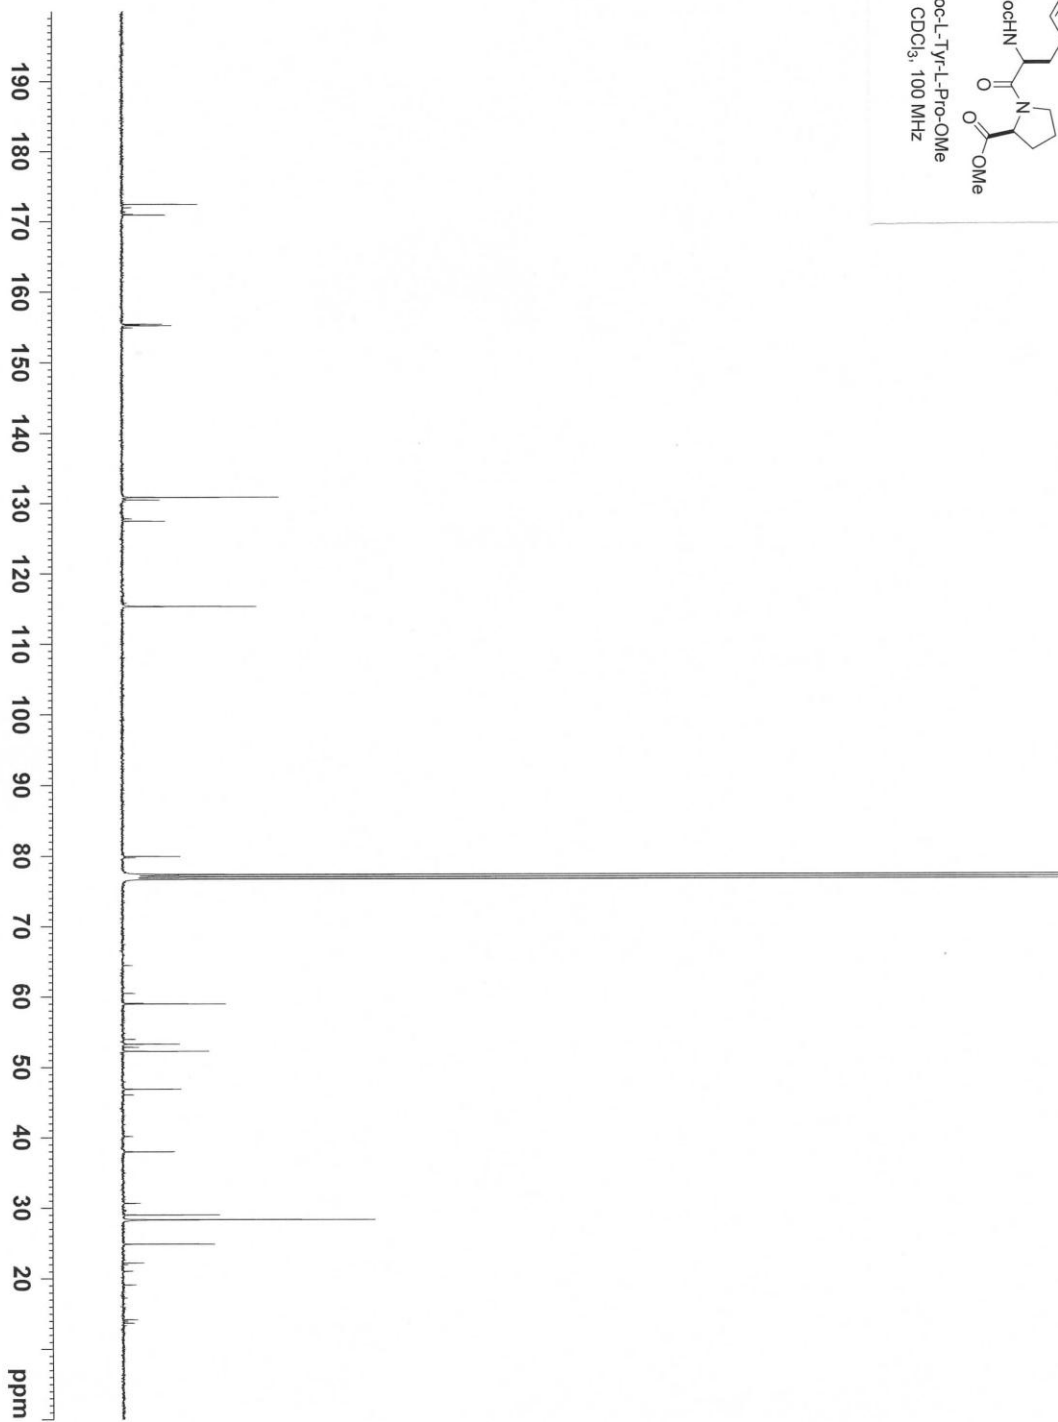

Boc-L-Ala-L-Phe-Gly-OMe

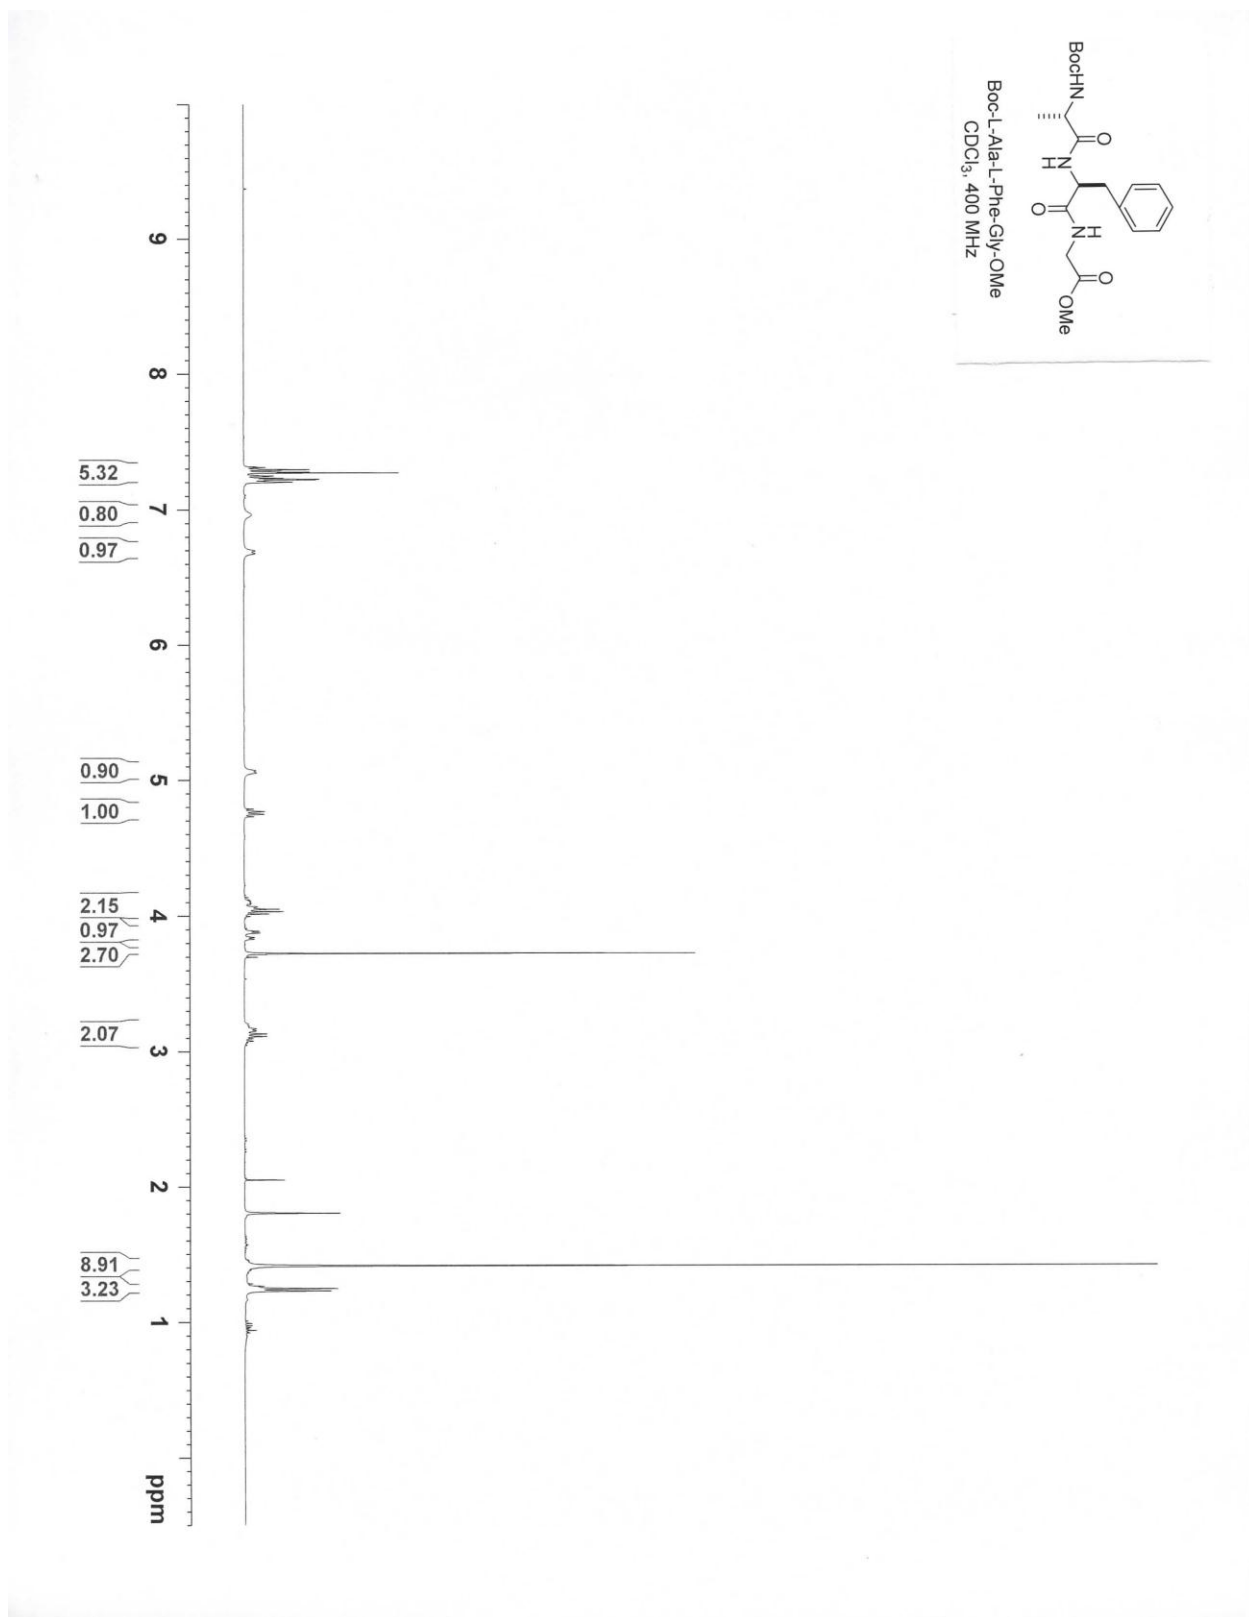

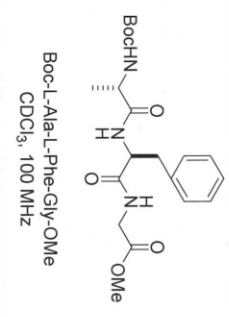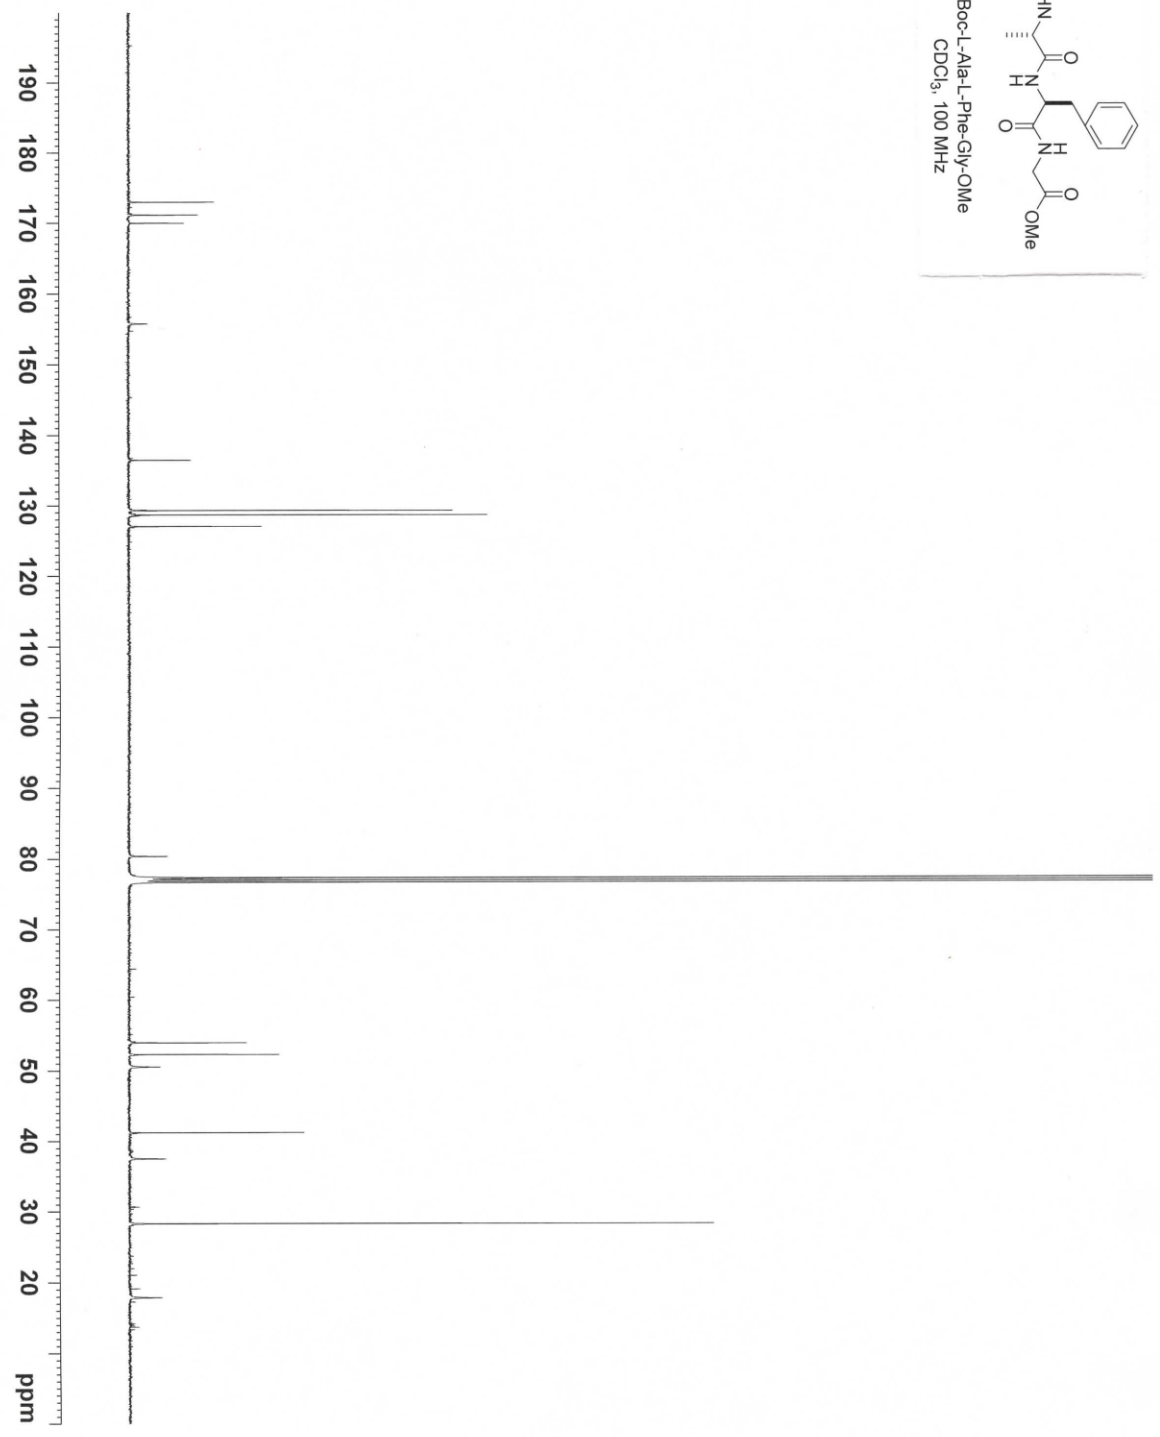

Z-D-Phg-L-Val-O<sup>t</sup>Bu

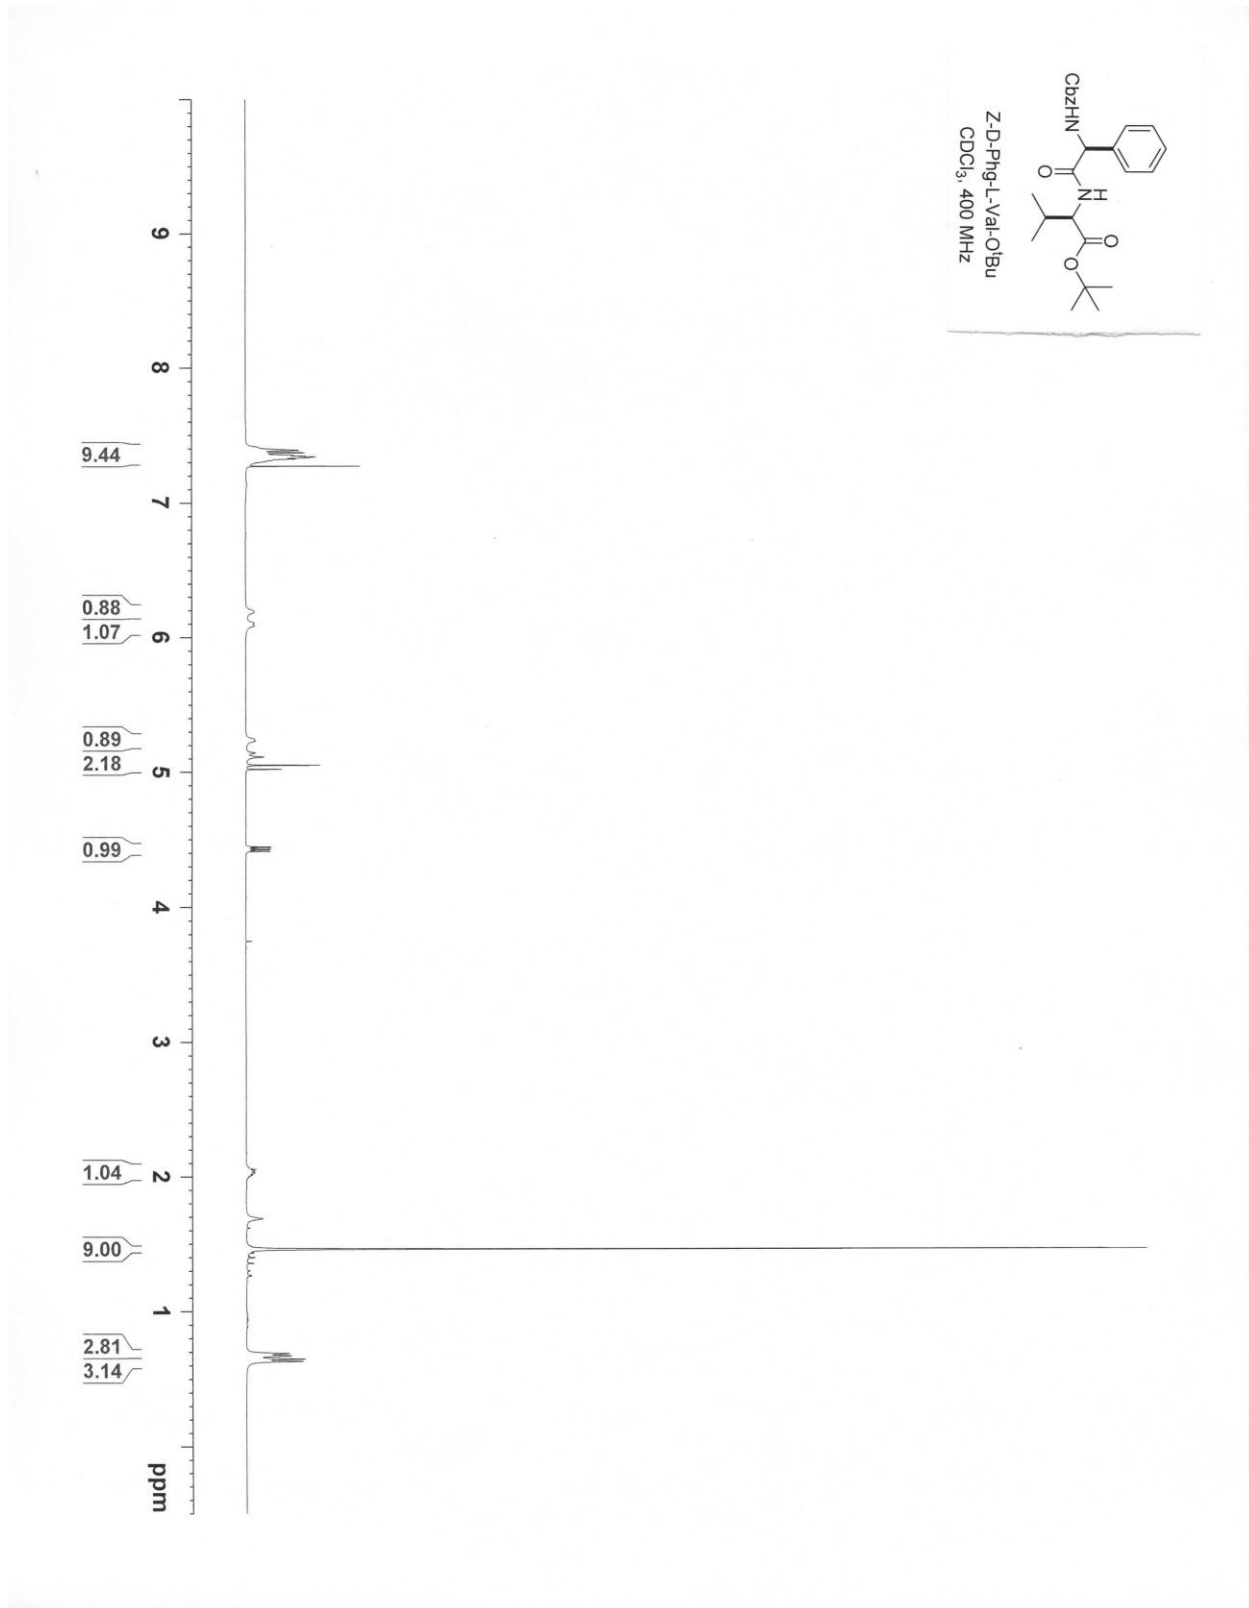

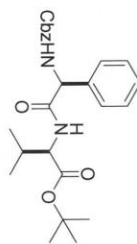

Z-D-Phe-L-Val-O<sup>t</sup>Bu  
CDCl<sub>3</sub>, 100 MHz

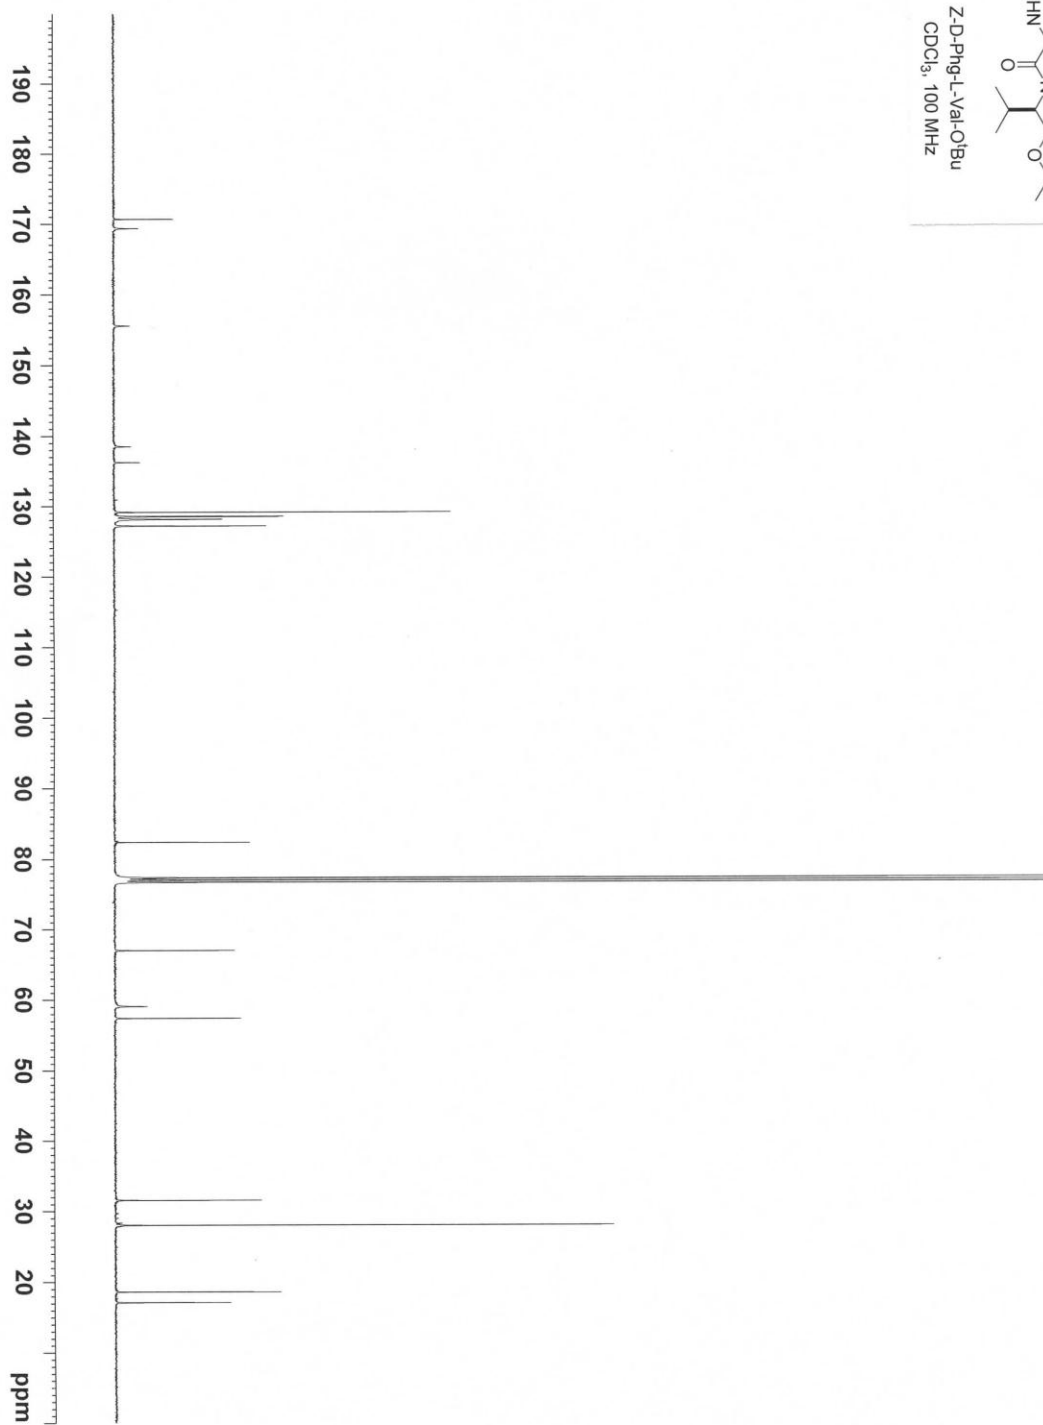

Boc-L-Lys-L-Pro-NH<sub>2</sub>

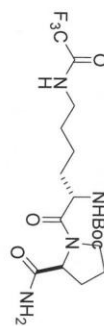

Boc-L-Lys-L-Pro-NH<sub>2</sub>  
CD<sub>3</sub>OD, 500 MHz

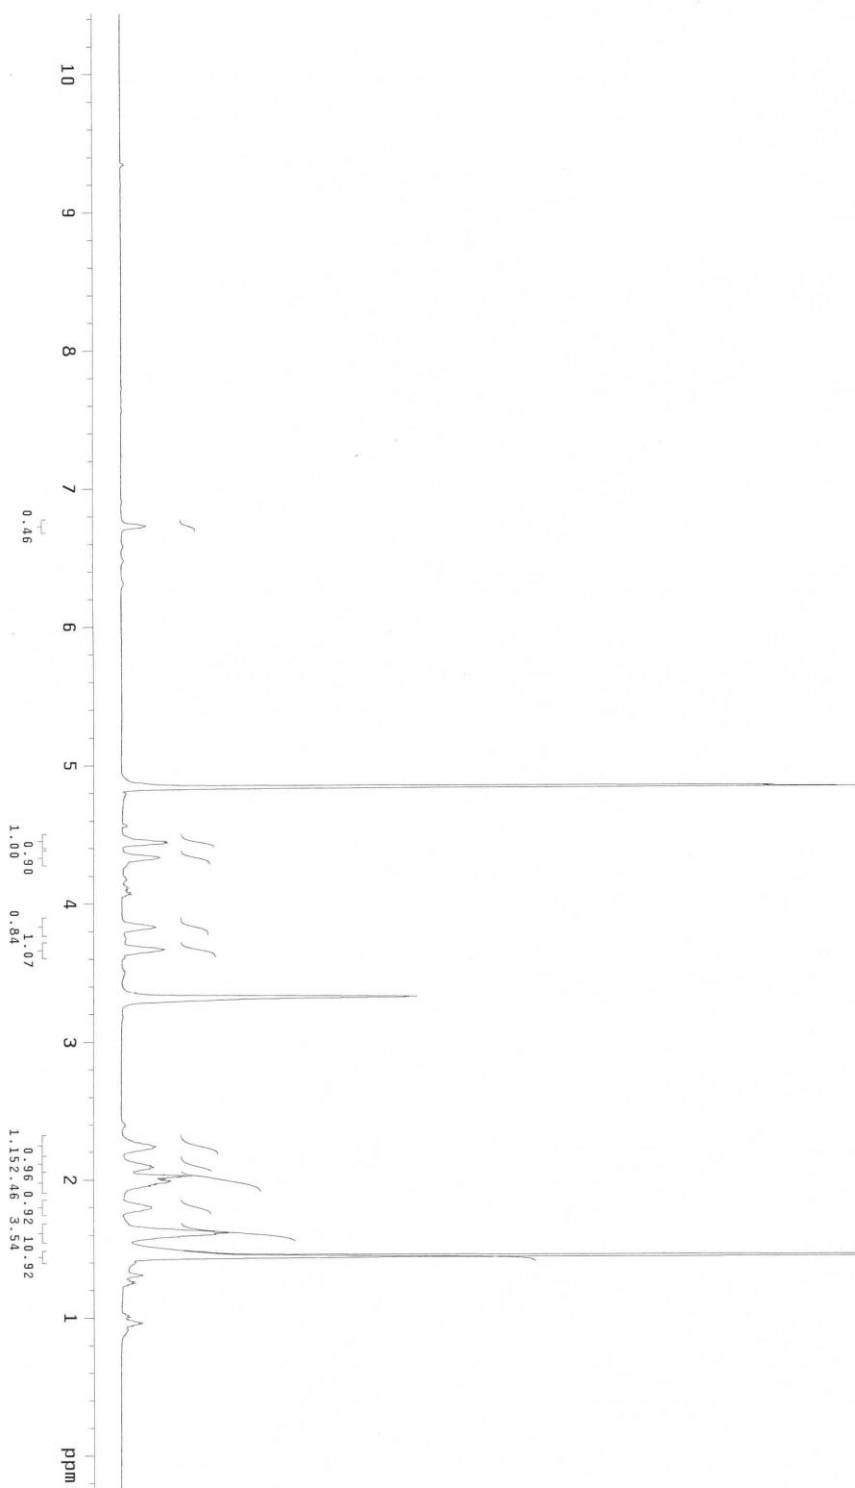



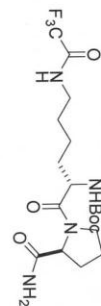

Boc-L-lys-L-Pro-NH<sub>2</sub>  
CD<sub>3</sub>OD, 125 MHz

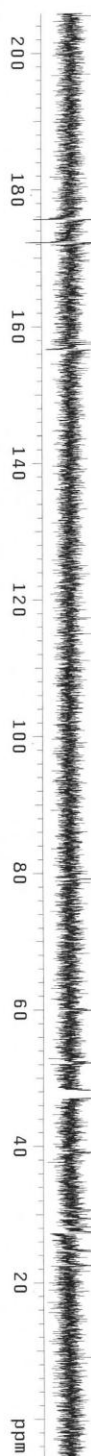

Boc-L-Lys-L-Ala-NH<sub>2</sub>

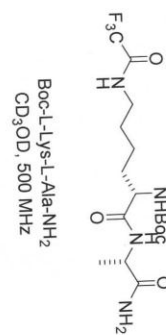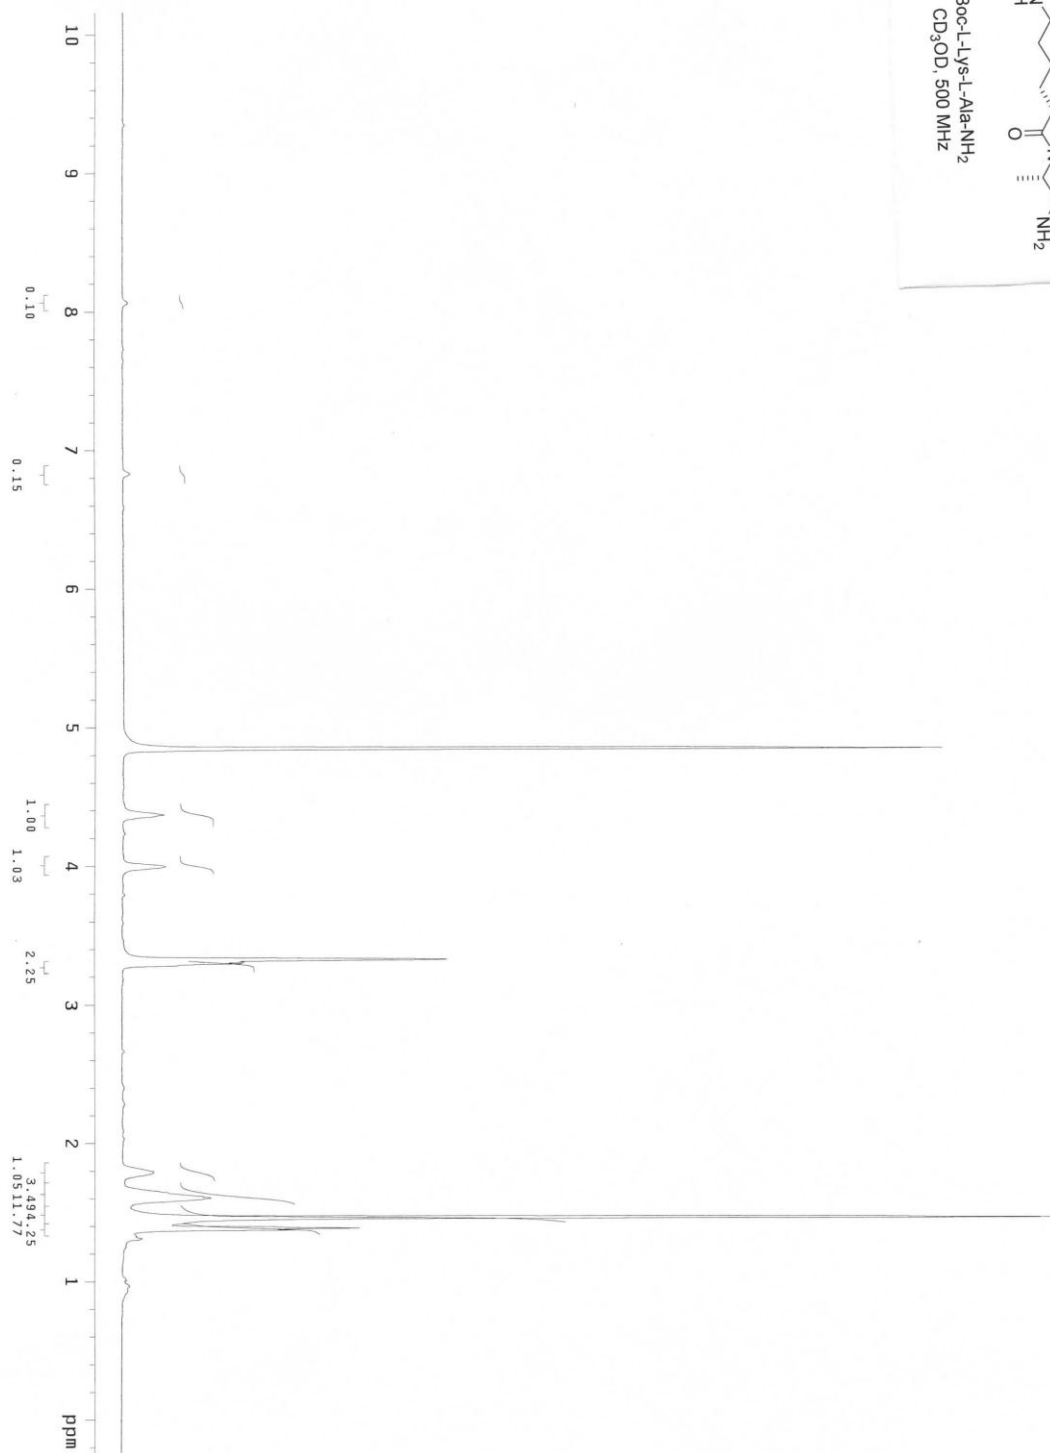

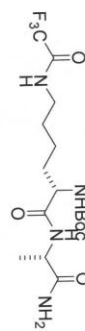

Boc-L-Lys-L-Ala-NH<sub>2</sub>  
CD<sub>3</sub>OD, 125 MHz

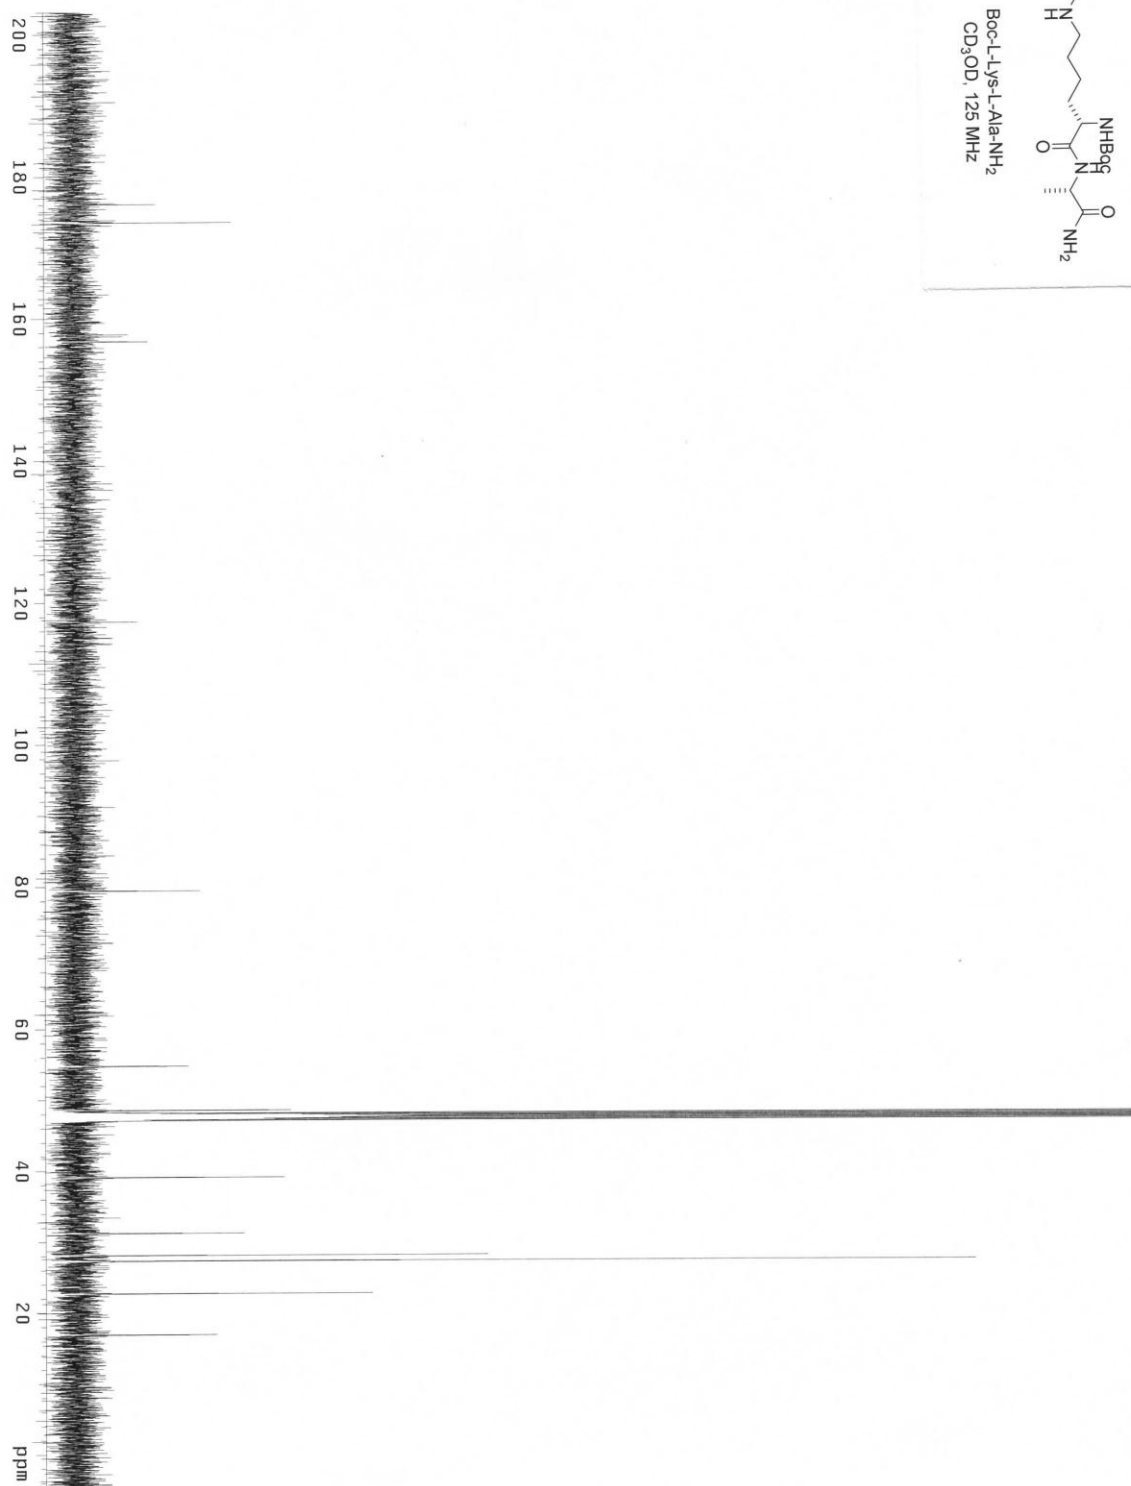

Fmoc-L-Tyr-L-Ala-OMe

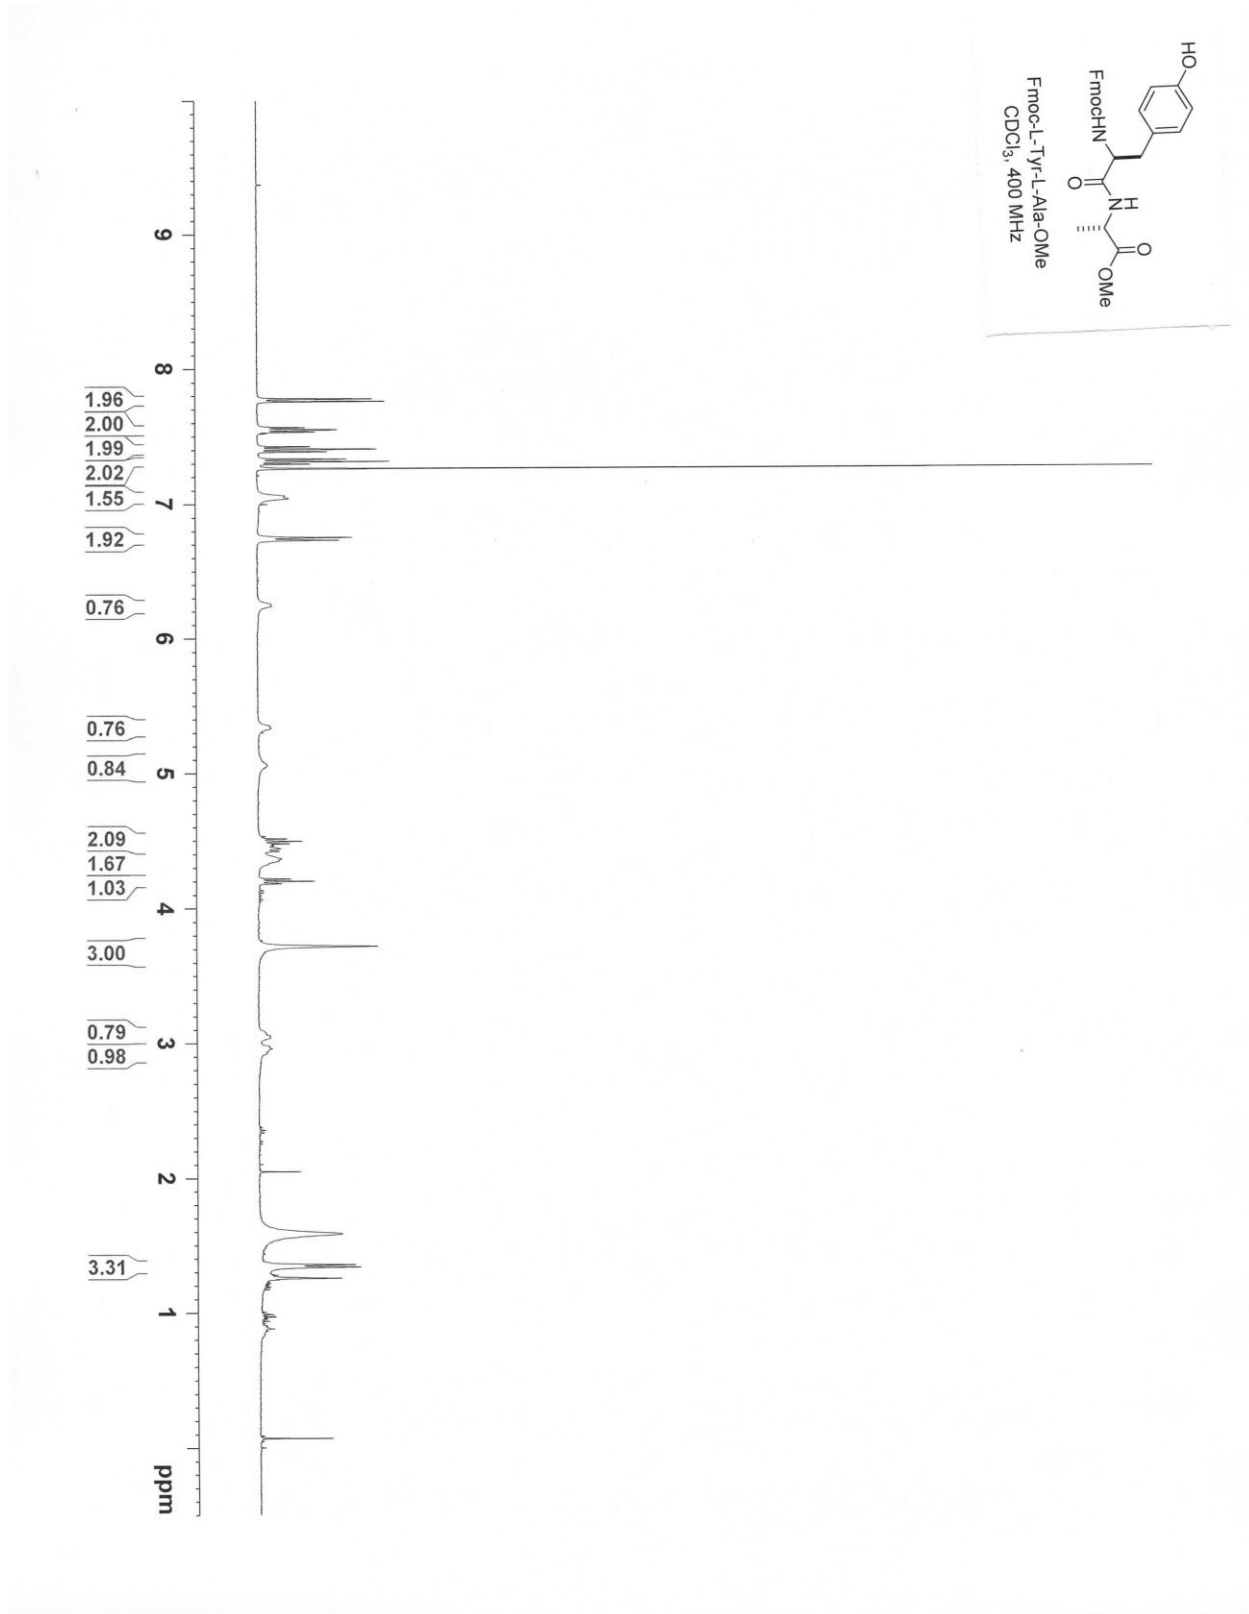

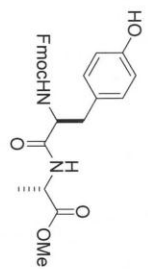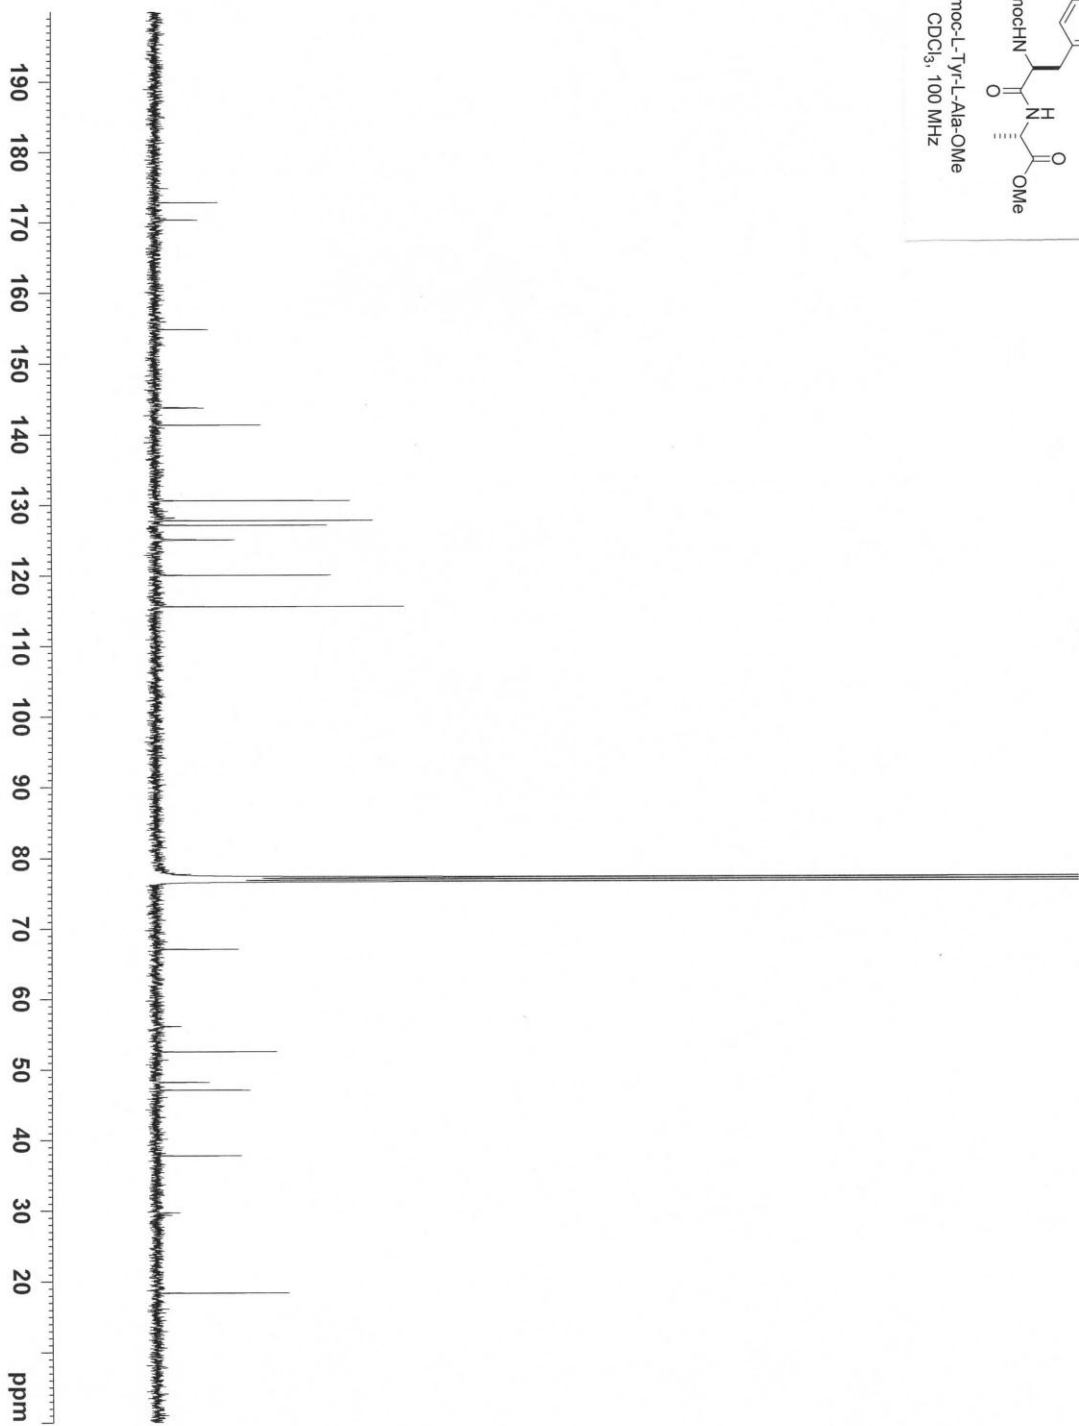

Fmoc-L-Val-L-Pro-NH<sub>2</sub>

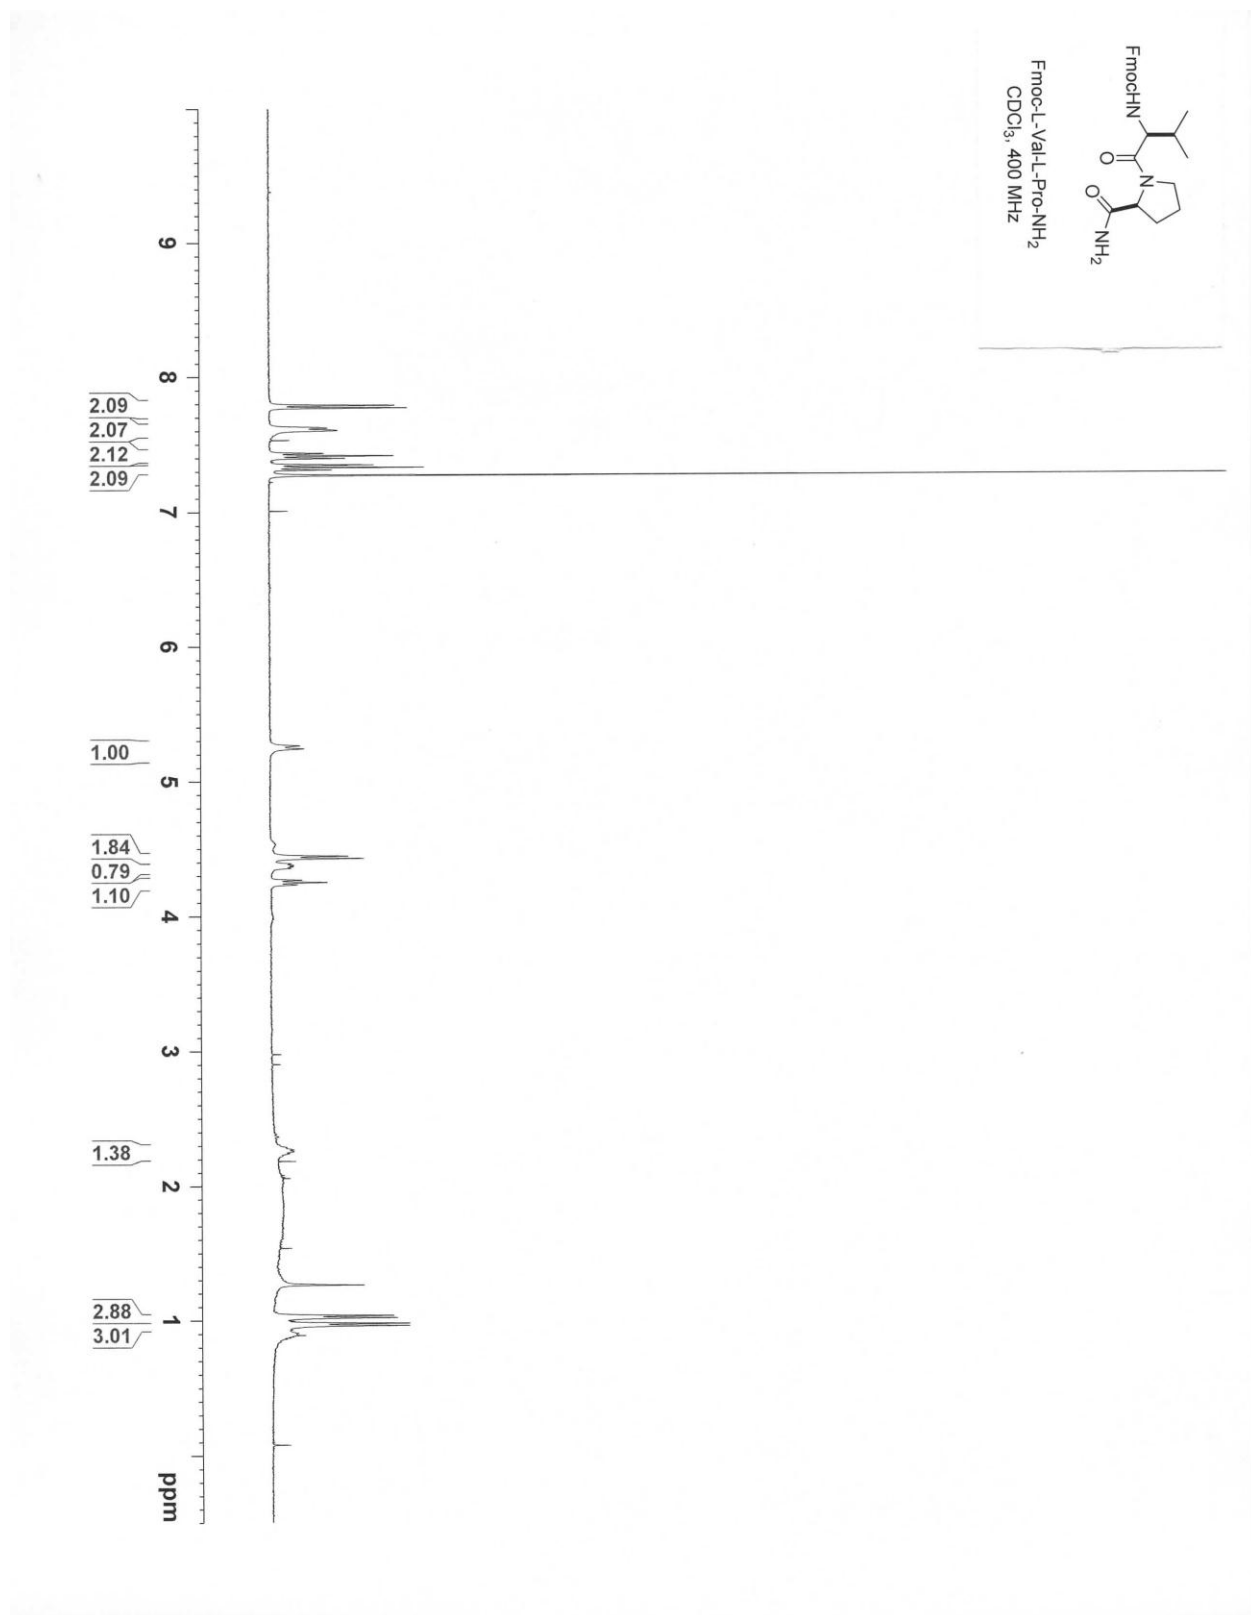

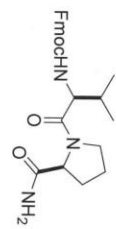

CDCl<sub>3</sub>, 100 MHz

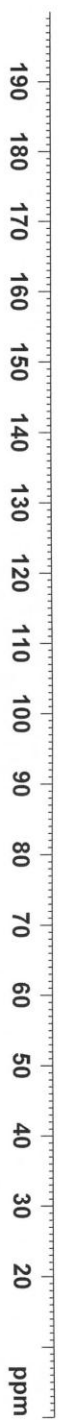

Z-L-Tyr-L-Ala-OMe

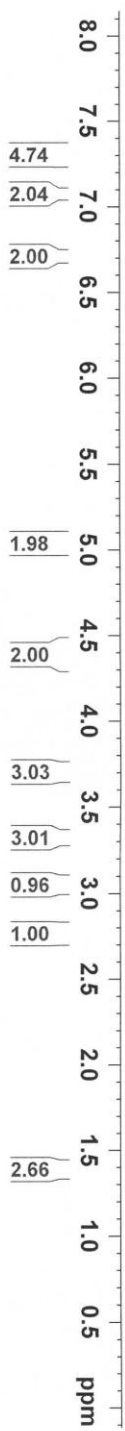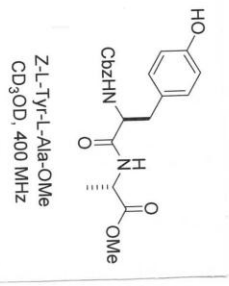



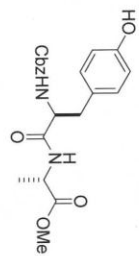

Z-L-Tyr-L-Ala-OMe  
CD<sub>3</sub>OD, 100 MHz

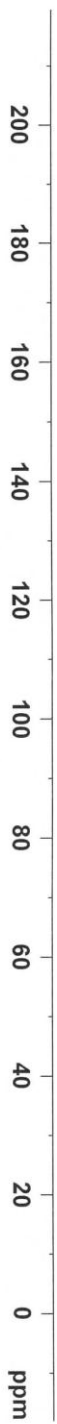

Boc-L-Val-L-Pro-NH<sub>2</sub>

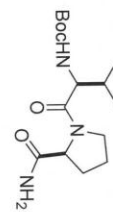

Boc-L-Val-L-Pro-NH<sub>2</sub>  
CDCl<sub>3</sub>, 500 MHz

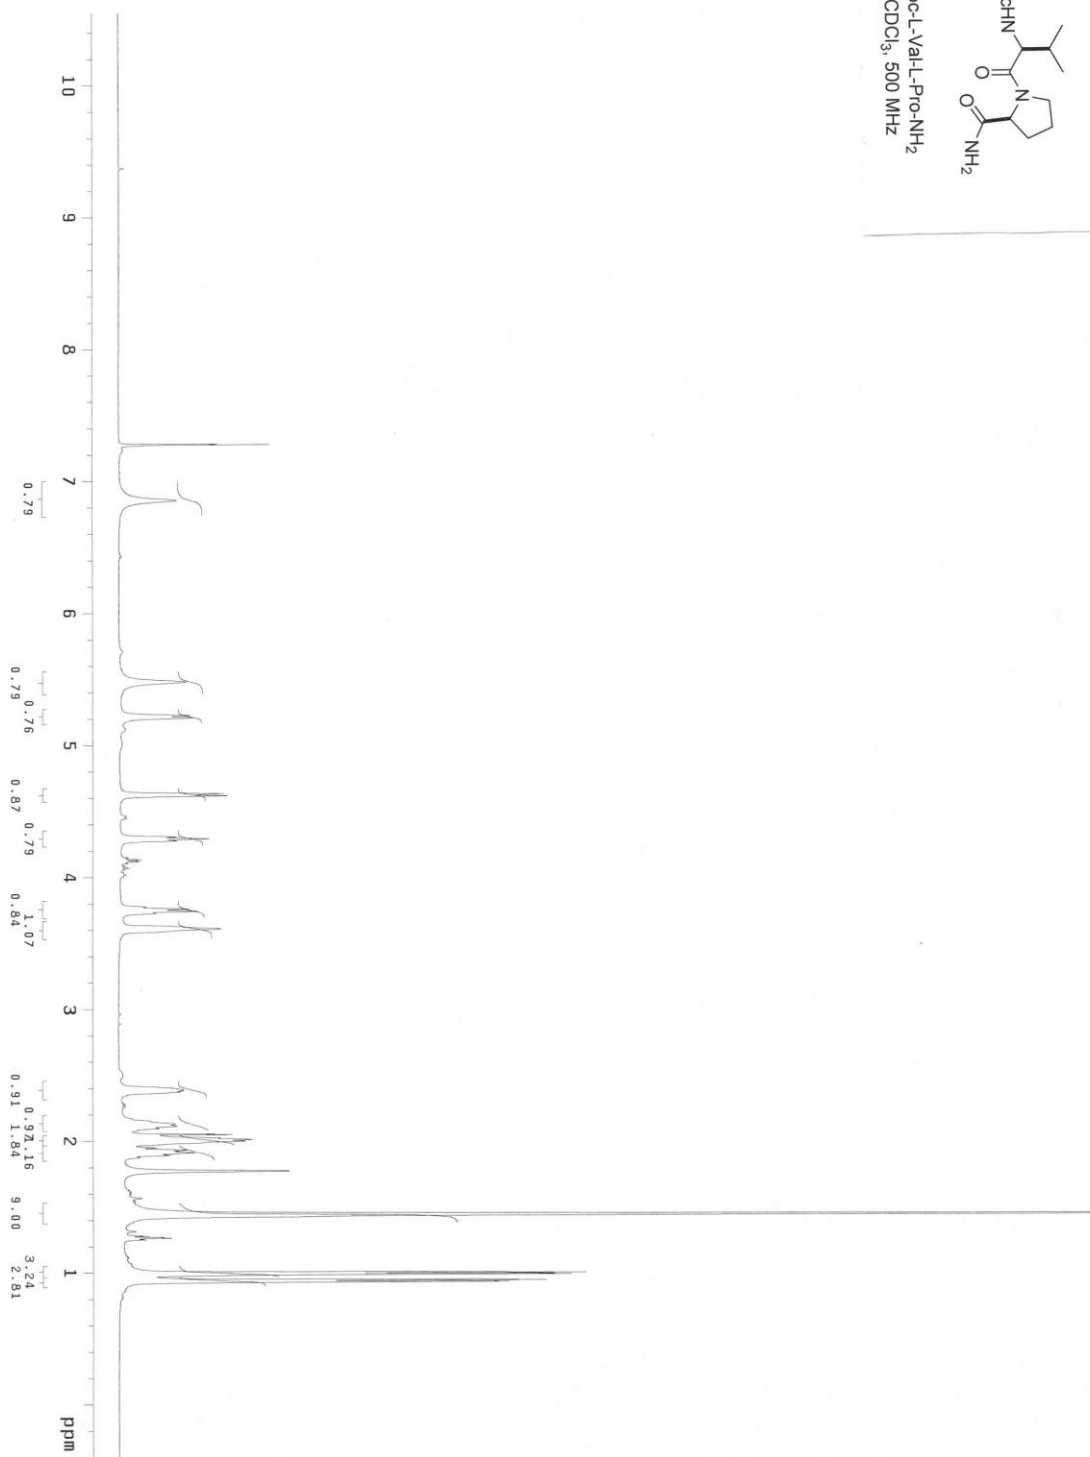

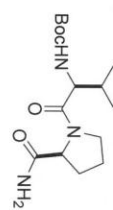

Boc-L-Val-L-Pro-NH<sub>2</sub>  
CDCl<sub>3</sub>, 125 MHz

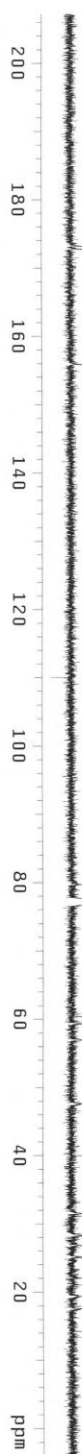

Boc-L-Tyr-N-Me-L-Ala-OMe

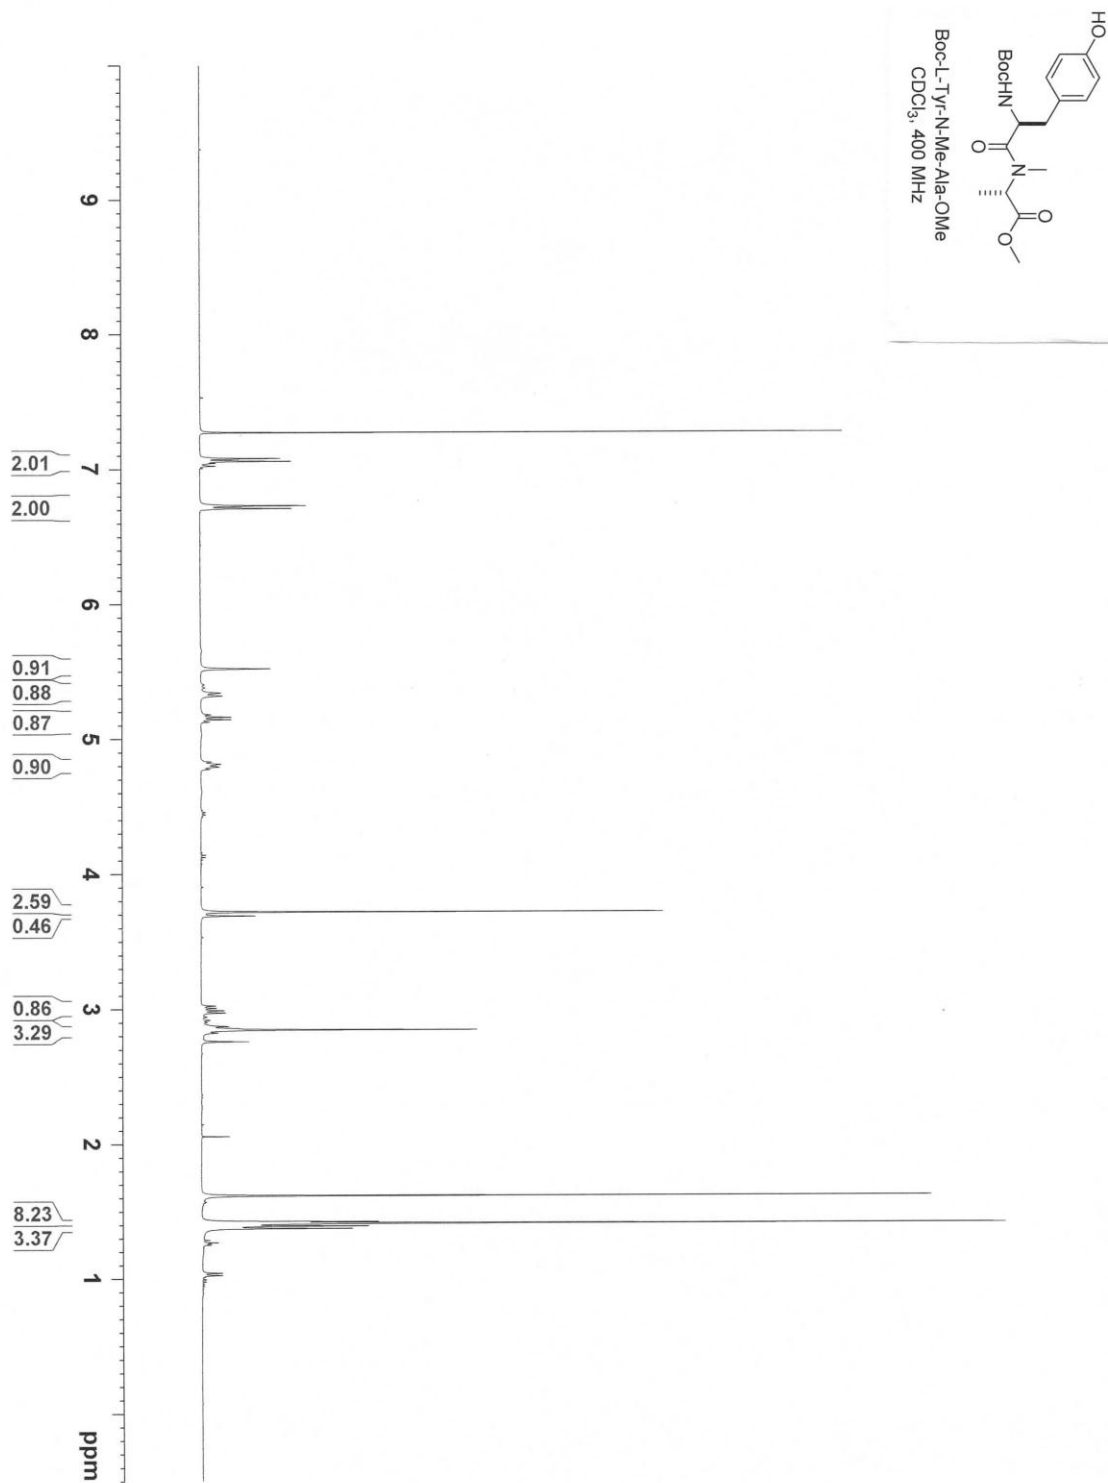

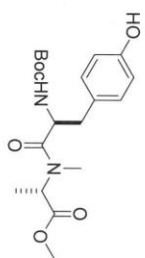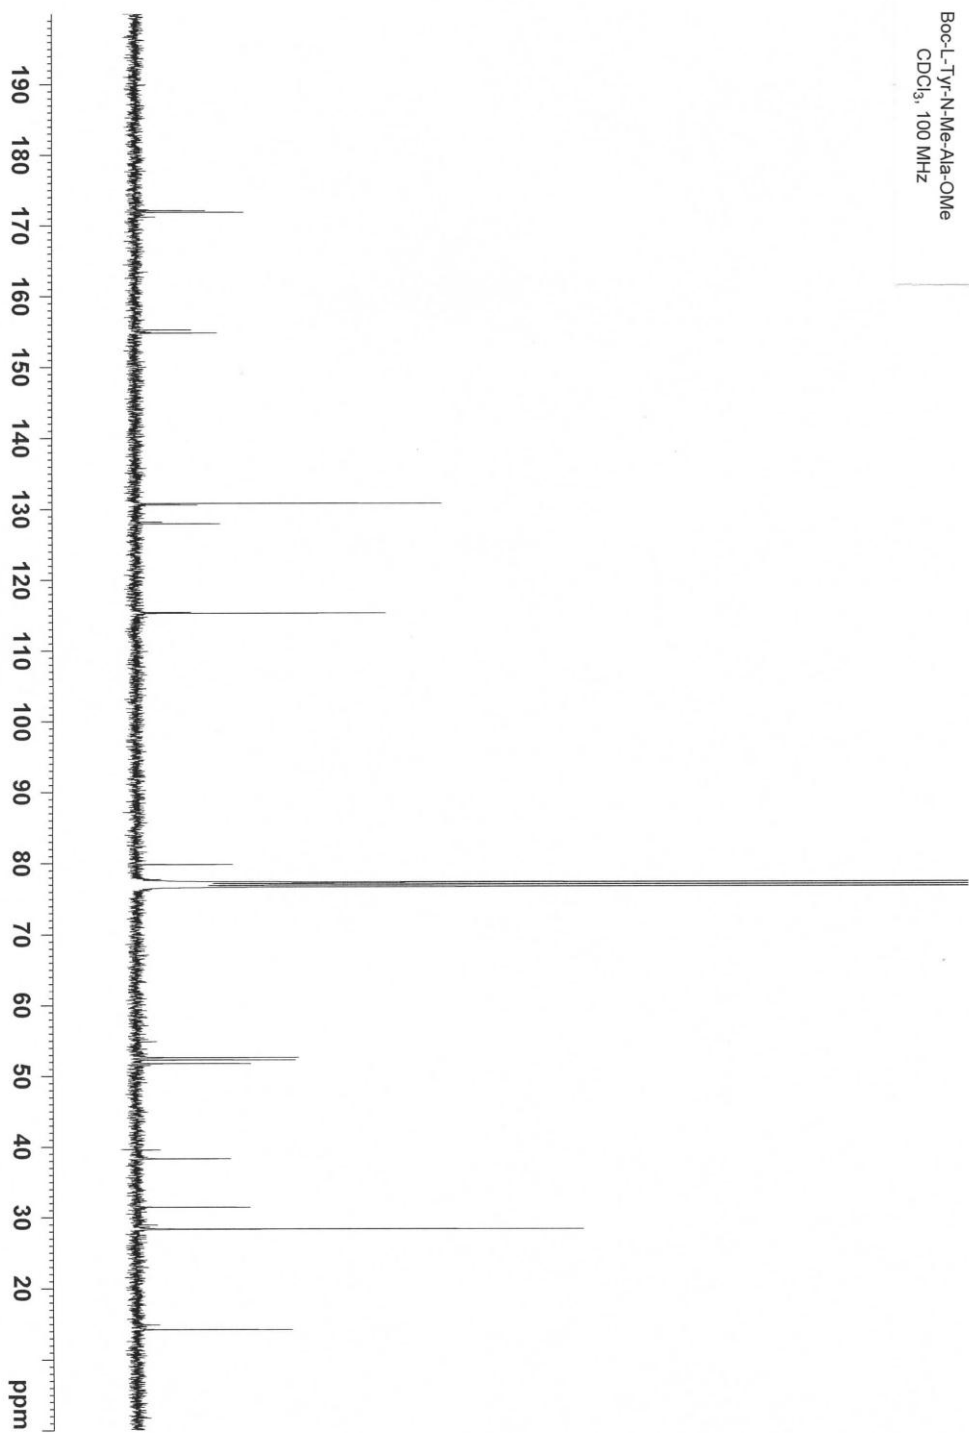

Z-L-Phg-L-Phe-OMe

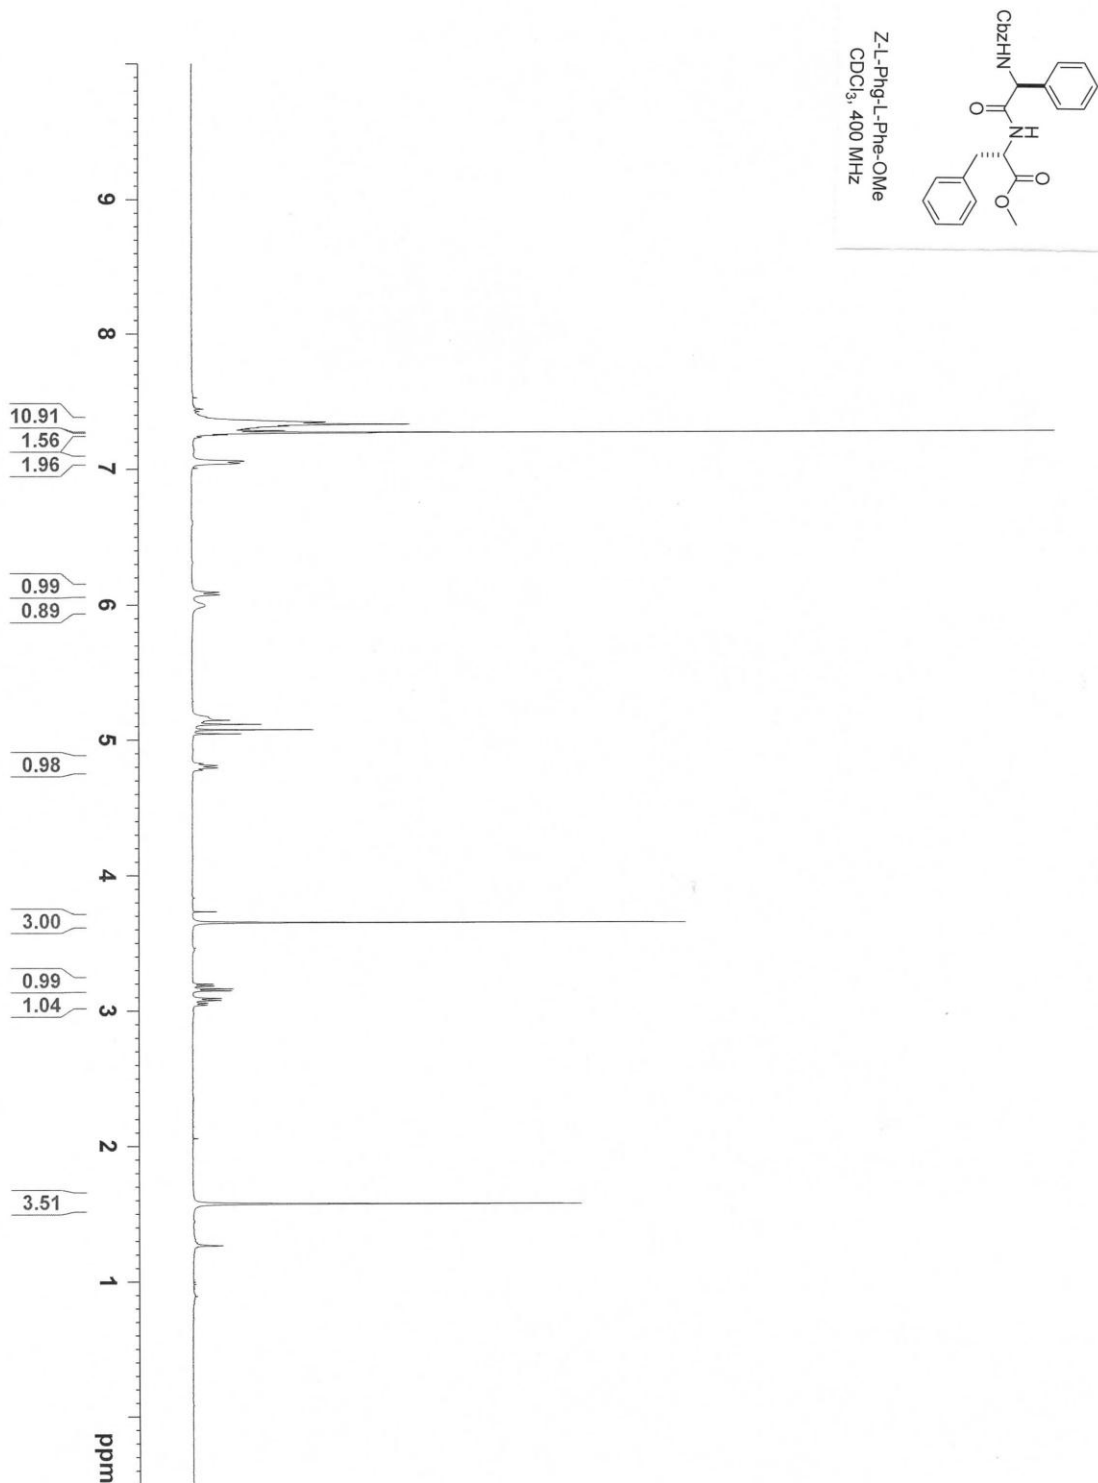

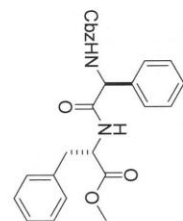

Z-L-Phe-L-Phe-OMe  
CDCl<sub>3</sub>, 100 MHz

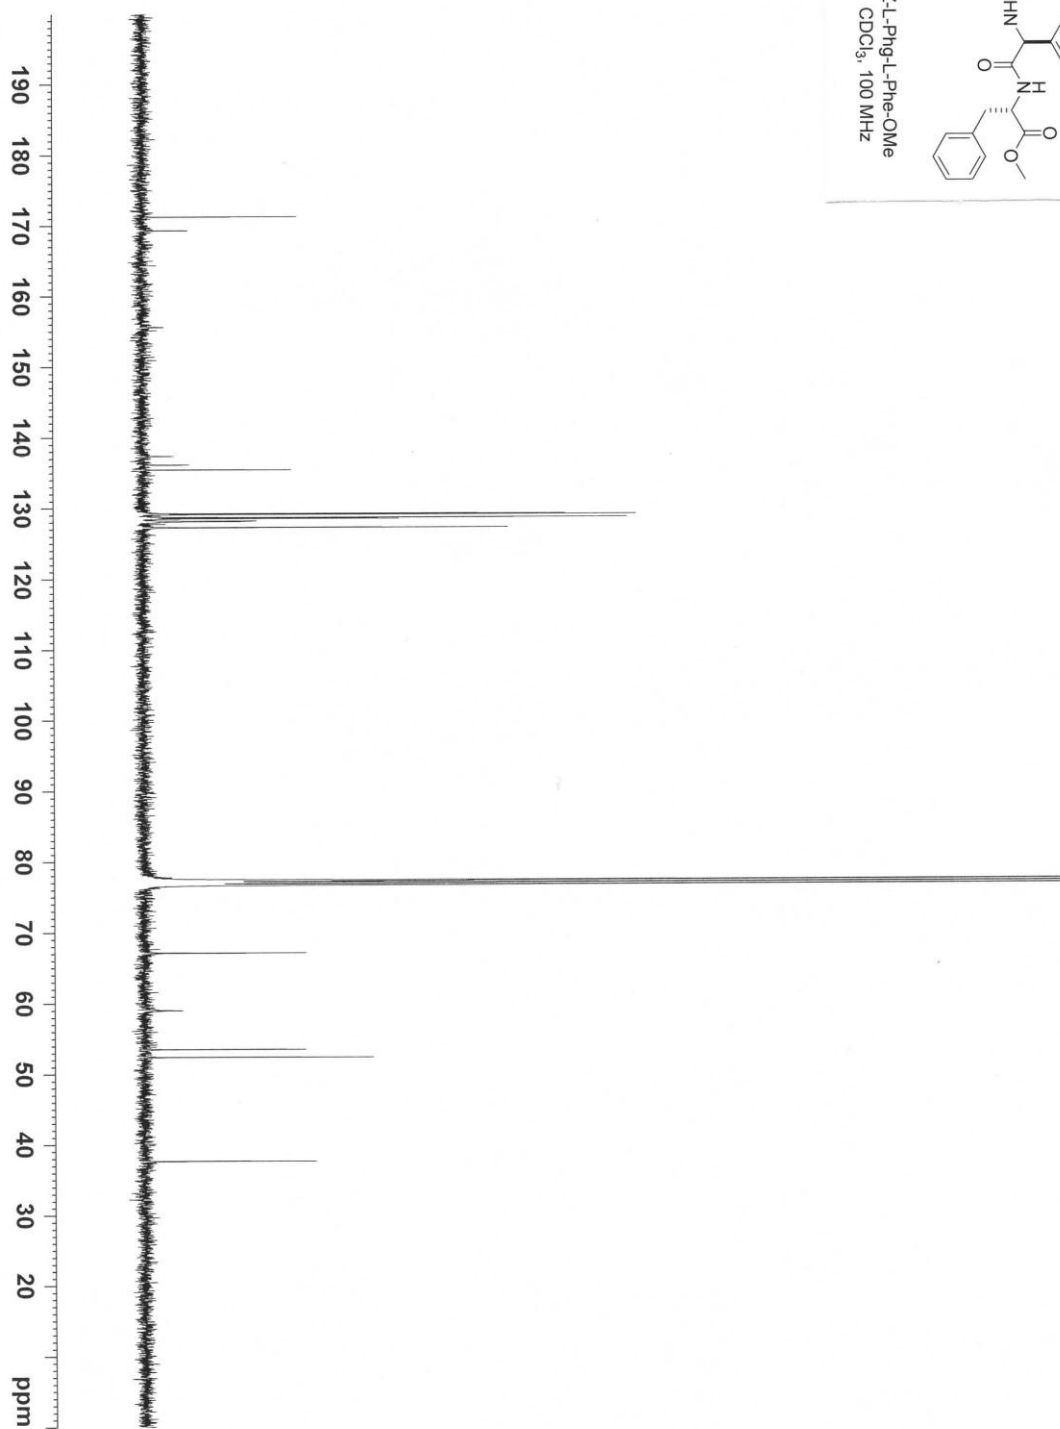

Z-D-Phg-L-Phe-OMe

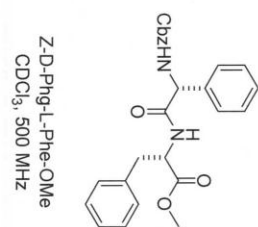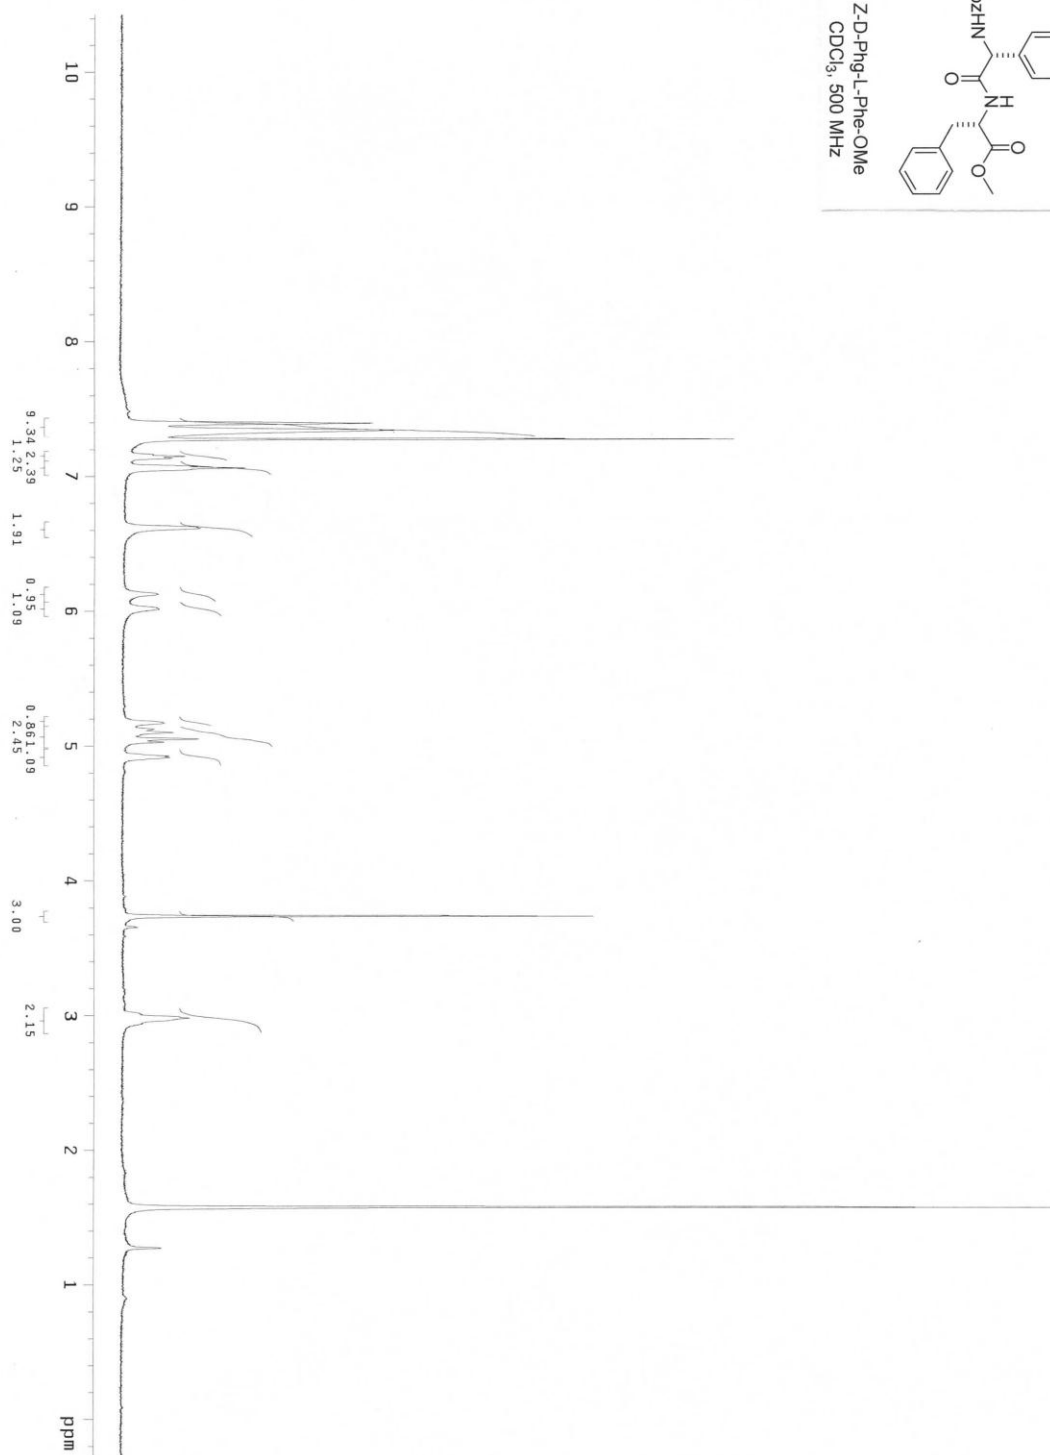



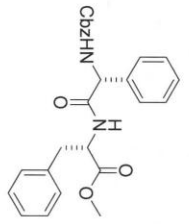

Z-D-Phg-L-Phe-OMe  
CDCl<sub>3</sub>, 125 MHz

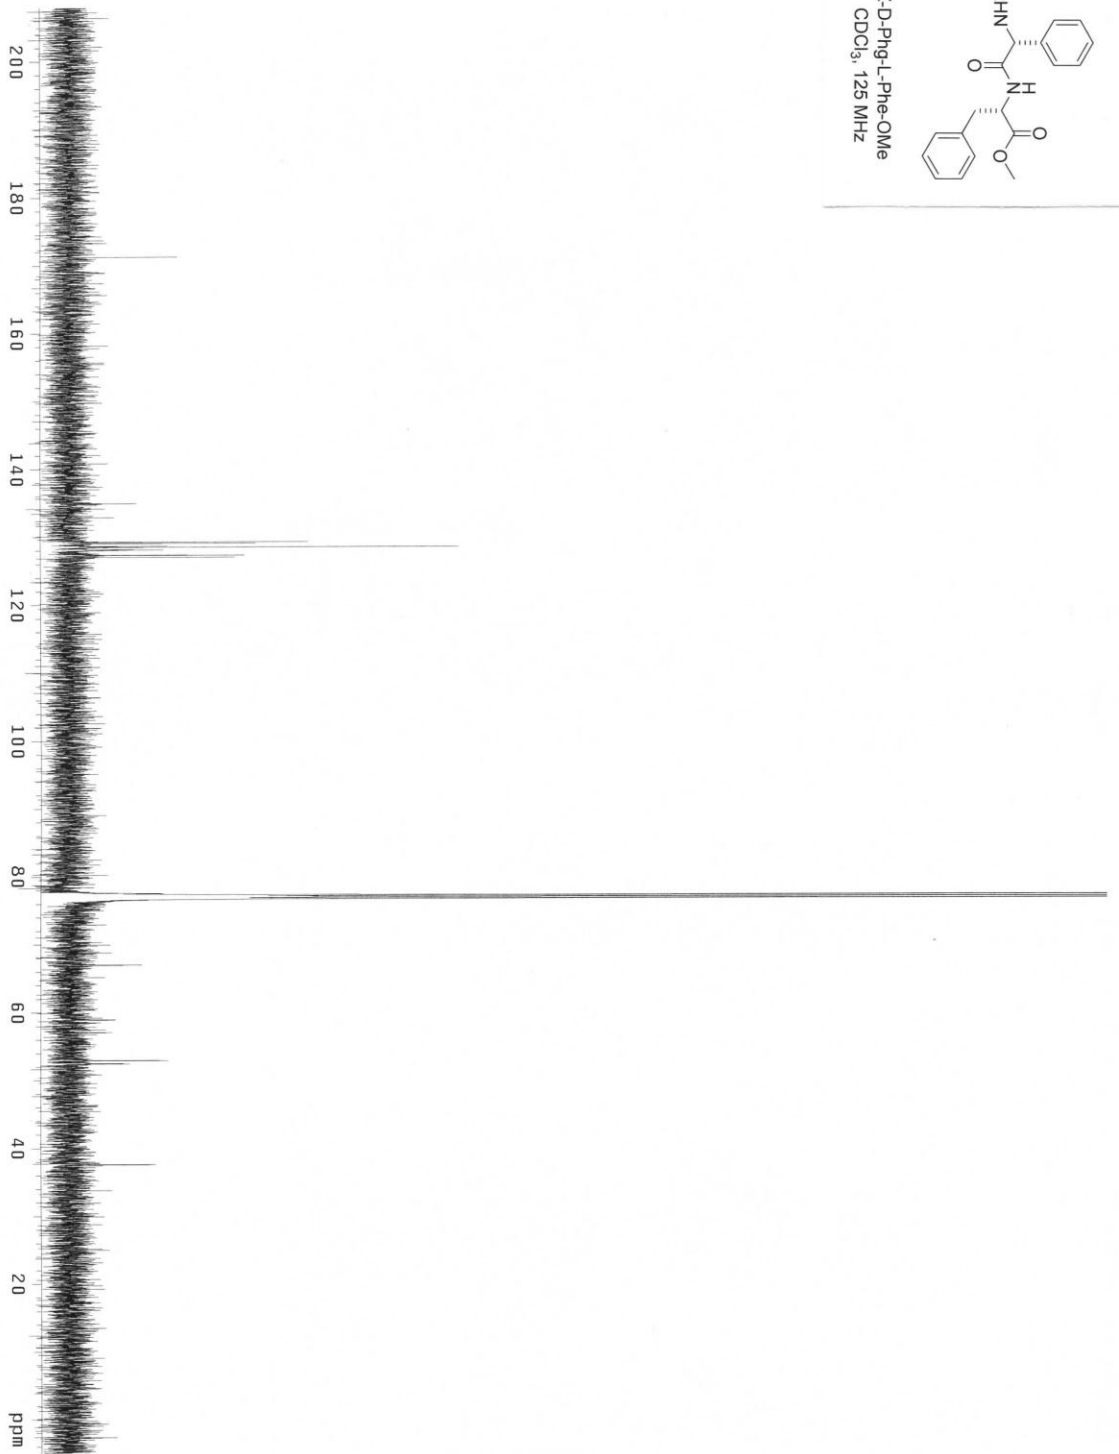

Boc-L-Ala-D-Glu(OMe)-L-Lys(OTf)-D-Ala-D-Ala-OMe

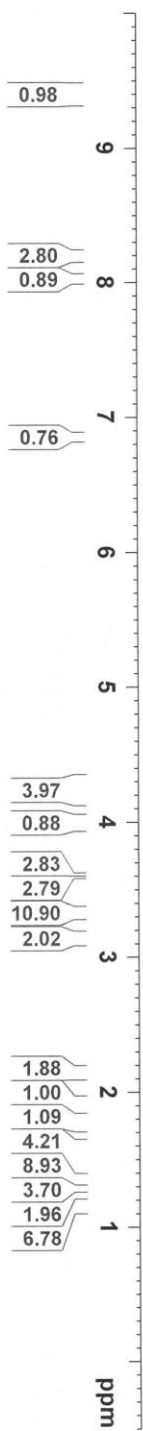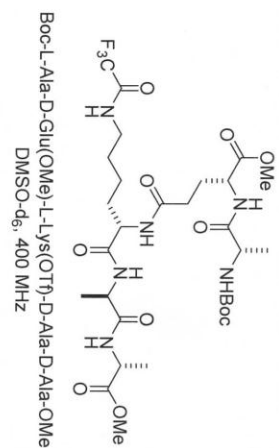

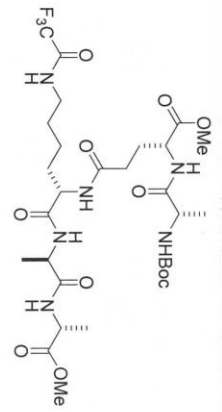

Boc-L-Ala-D-Glu(OMe)-L-Lys(OTf)-D-Ala-D-Ala-OMe  
 DMSO-d<sub>6</sub>, 100 MHz

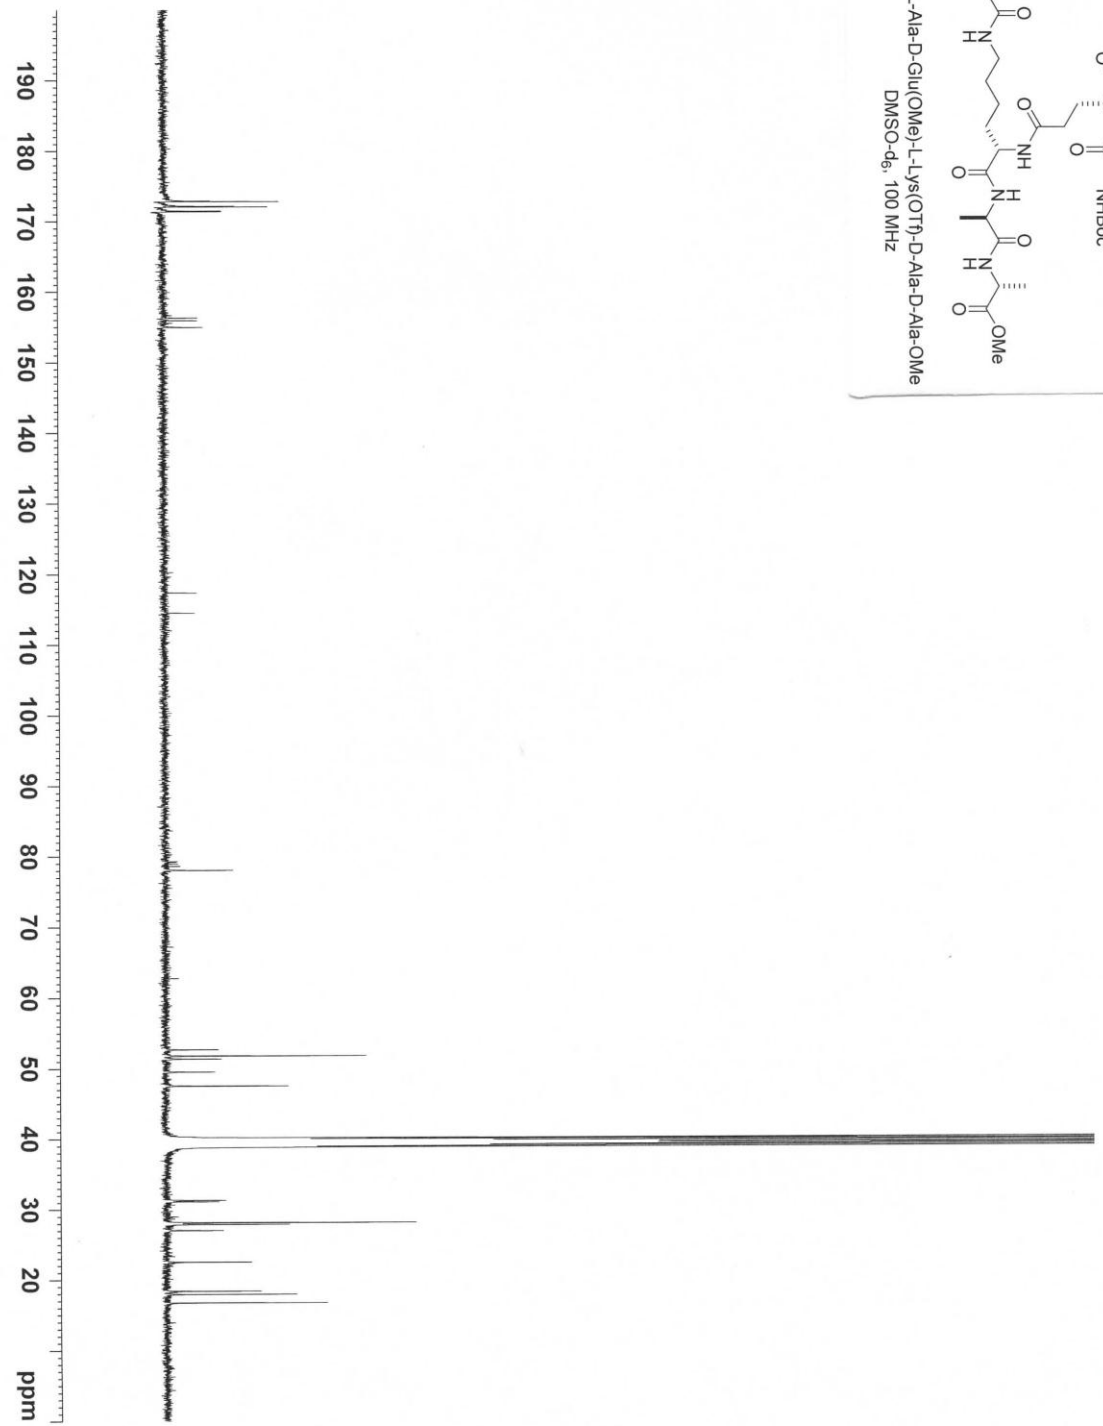

## Racemic analysis via HPLC

### Z-L-Phg-L-Phe-O<sup>t</sup>Bu

Chromatography condition: 60-70% acetonitrile in 0.05% formic acid in 12 min, 0.5 ml/min, 254 nm  
Result:  $t_R = 8.98$  min,  $de > 99.8\%$

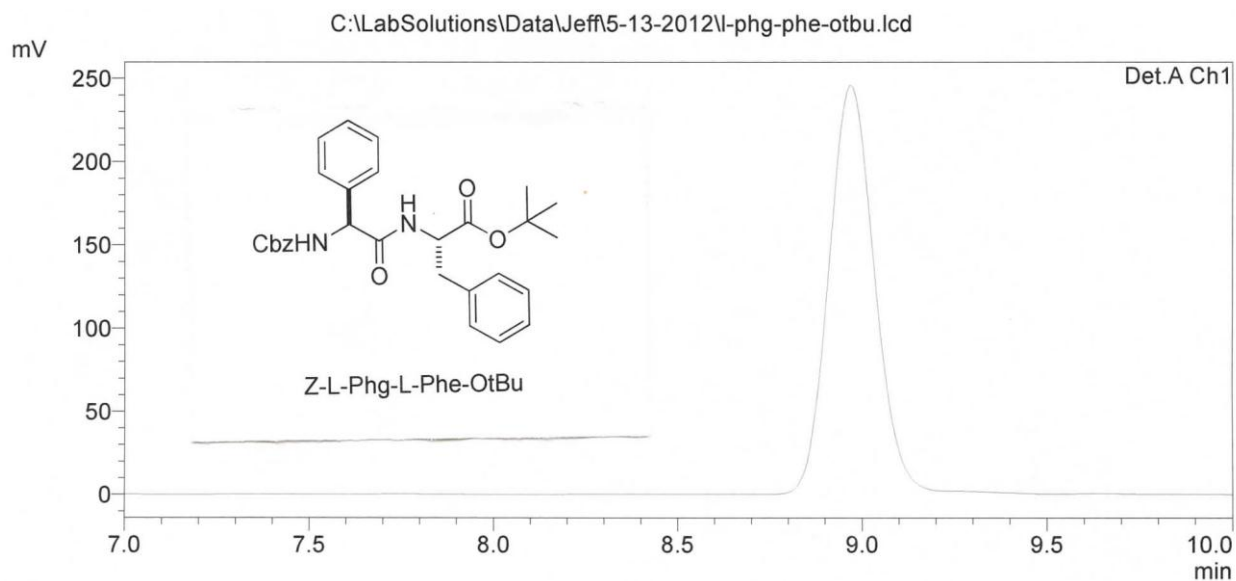

### Z-D-Phg-L-Phe-O<sup>t</sup>Bu

Chromatography condition: 60-70% acetonitrile in 0.05% formic acid in 12 min, 0.5 ml/min, 254 nm  
Result:  $t_R = 9.40$  min,  $de = 95.9\%$

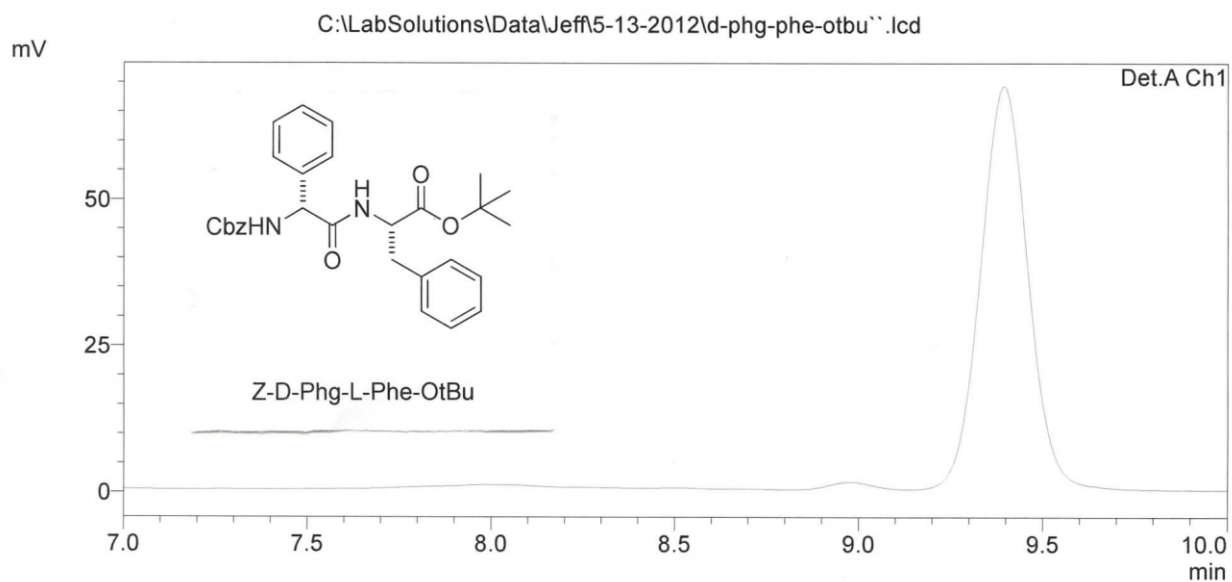

### Z-L-Phg-L-Phe-O<sup>t</sup>Bu + Z-D-Phg-L-Phe-O<sup>t</sup>Bu

Chromatography condition: 60-70% acetonitrile in 0.05% formic acid in 12 min, 0.5 ml/min, 254 nm

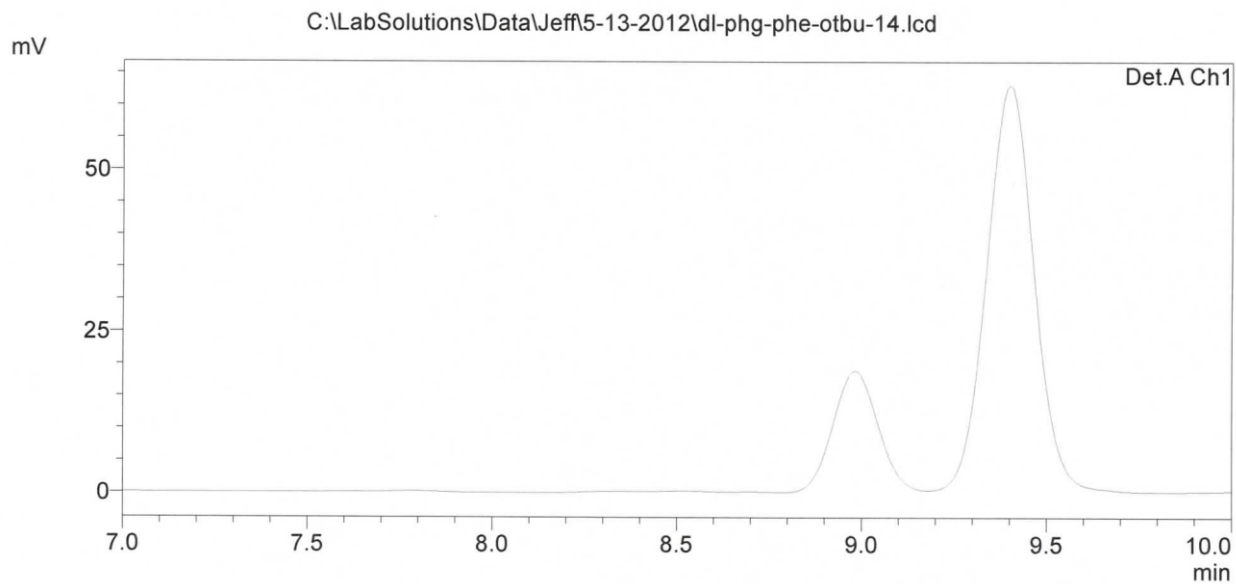

Z-L-Phg-L-Val-O<sup>t</sup>Bu

Chromatography condition: 60-70% acetonitrile in 0.05% formic acid in 12 min, 0.5 ml/min, 254 nm  
 Result:  $t_R = 7.42$  min,  $de > 99.8\%$

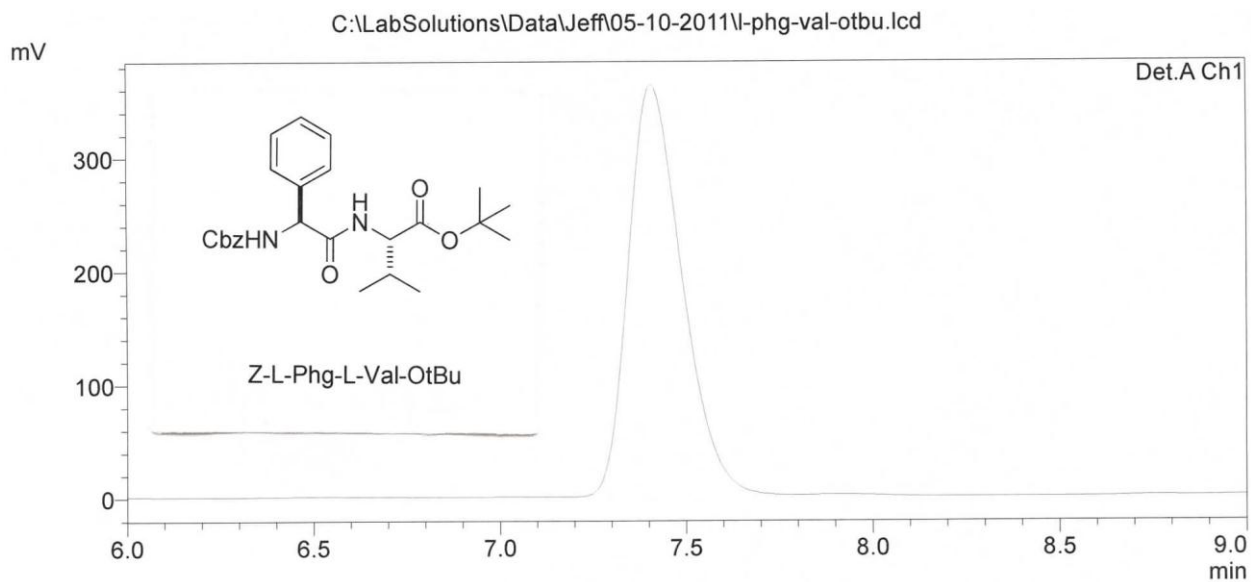

Z-D-Phg-L-Val-O<sup>t</sup>Bu

Chromatography condition: 60-70% acetonitrile in 0.05% formic acid in 12 min, 0.5 ml/min, 254 nm  
 Result:  $t_R = 7.90$  min,  $de = 96.3\%$

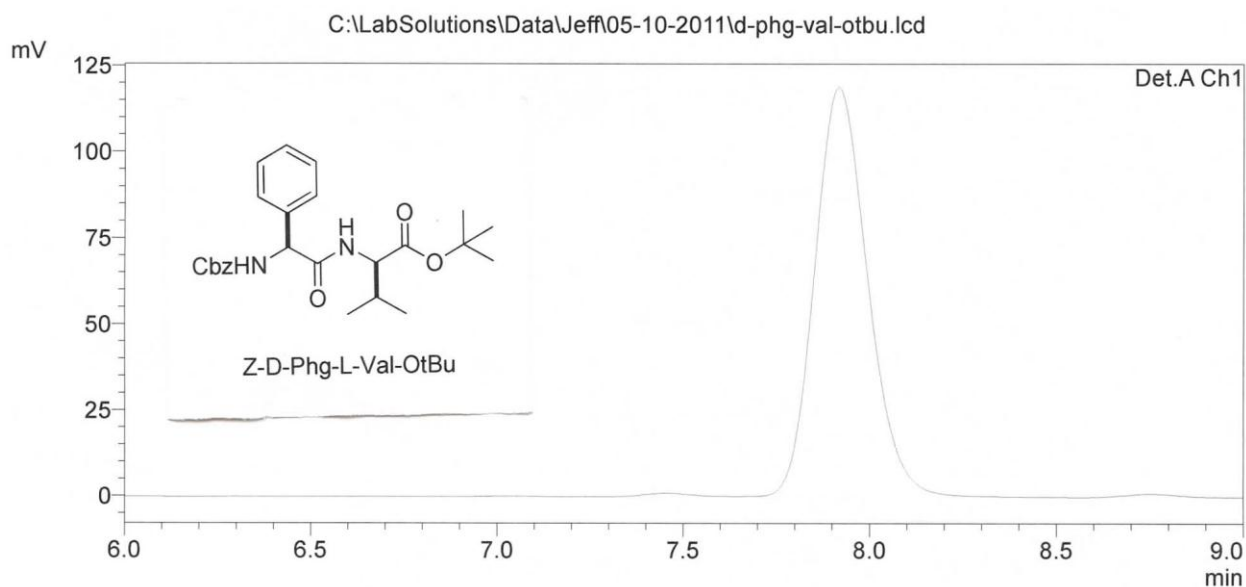

Z-L-Phg-L-Val-O<sup>t</sup>Bu + Z-D-Phg-L-Val-O<sup>t</sup>Bu

Chromatography condition: 60-70% acetonitrile in 0.05% formic acid in 12 min, 0.5 ml/min, 254 nm

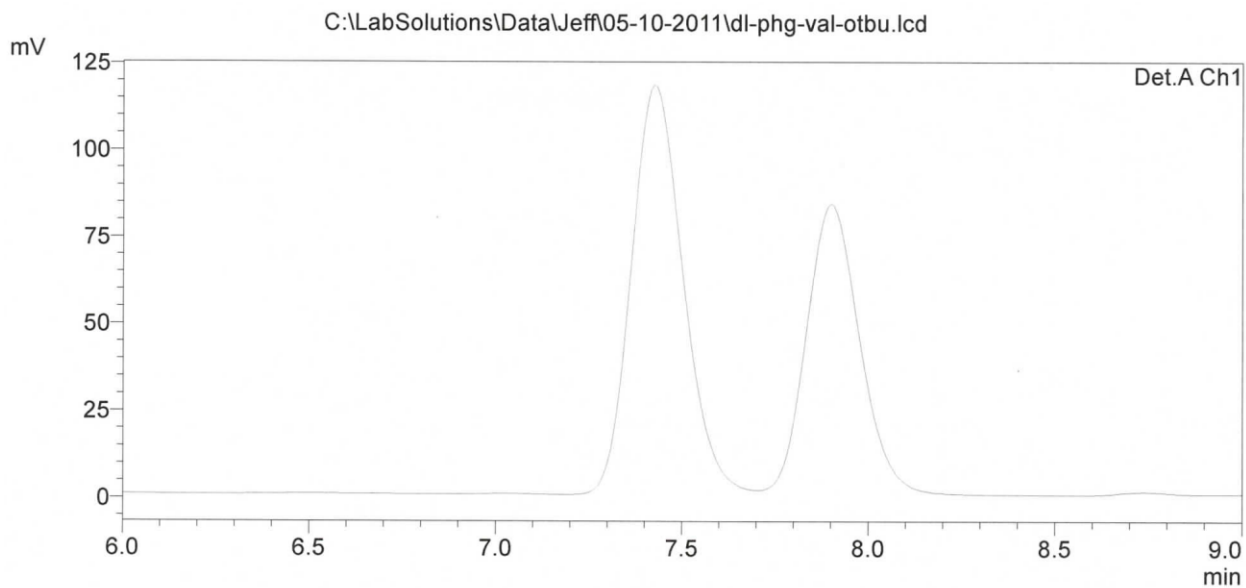

Z-L-Phg-L-Pro-NH<sub>2</sub>

Chromatography condition: 30-42% acetonitrile in 0.05% formic acid in 20 min, 0.3 ml/min, 254 nm

Result:  $t_R = 13.85$  min,  $de > 99.8\%$

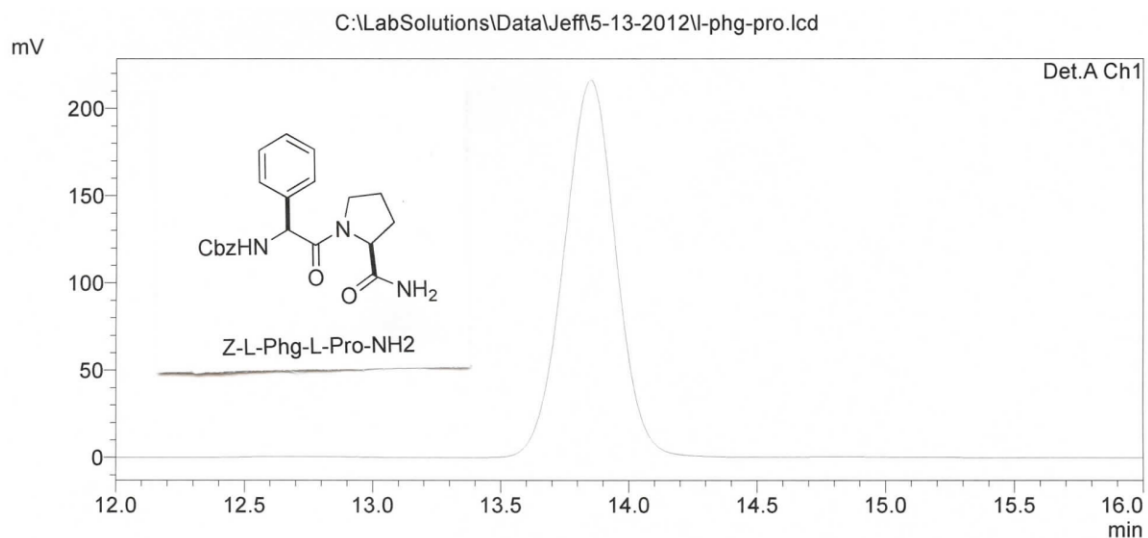

Z-D-Phg-L-Pro-NH<sub>2</sub>

Chromatography condition: 30-42% acetonitrile in 0.05% formic acid in 20 min, 0.3 ml/min, 254 nm  
 Result:  $t_R = 14.62$  min,  $de = 97.9\%$

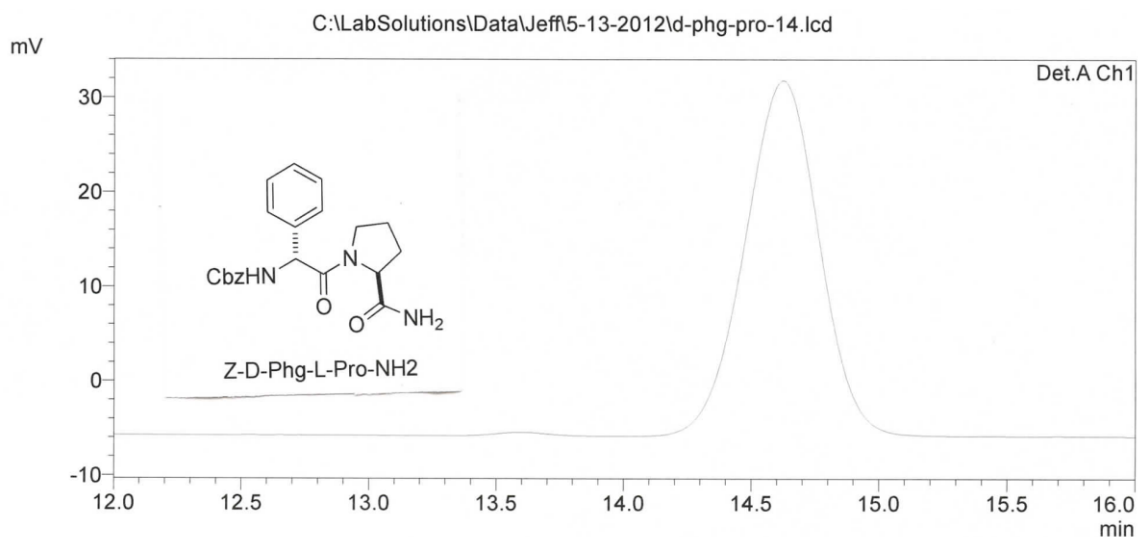

Z-L-Phg-L-Pro-NH<sub>2</sub> + Z-D-Phg-L-Pro-NH<sub>2</sub>

Chromatography condition: 30-42% acetonitrile in 0.05% formic acid in 20 min, 0.3 ml/min, 254 nm

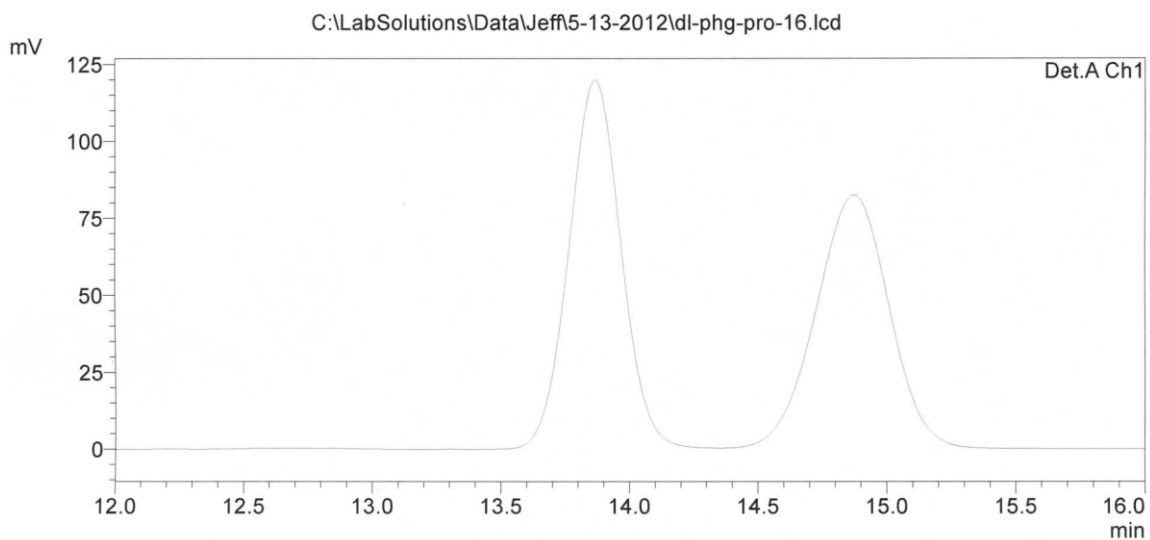

### Z-L-Tyr-Ala-OMe

Chromatography condition: 40-70% acetonitrile in 0.05% formic acid in 15 min, 0.3 ml/min, 280 nm  
 Result:  $t_R = 3.87$  min,  $de > 99.8\%$

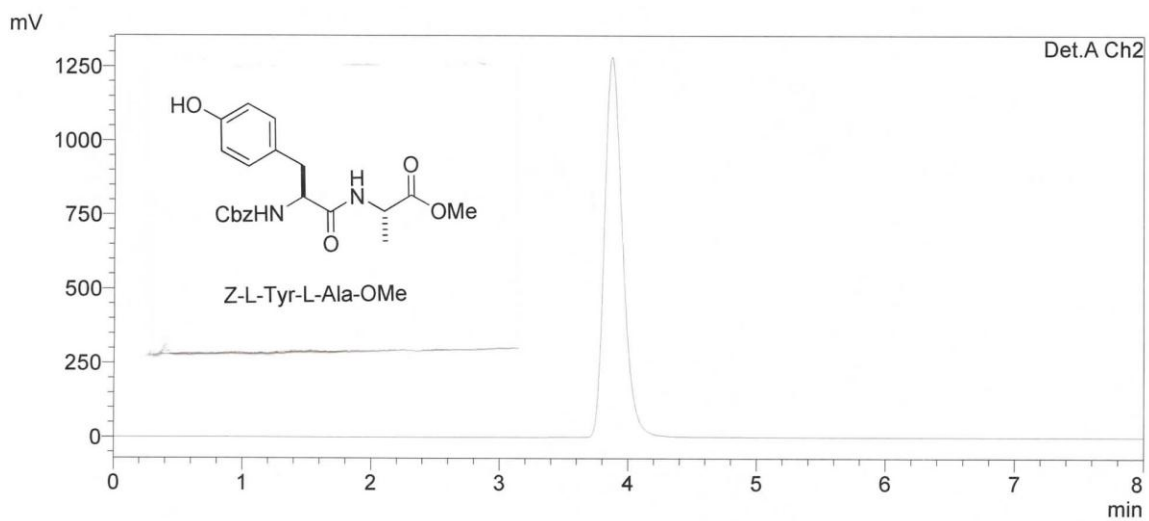

### Z-L-Phg-L-Val-OMe

Chromatography condition: 40-70% acetonitrile in 0.05% formic acid in 15 min, 0.3 ml/min, 254 nm  
 Result:  $t_R = 12.36$  min,  $de = 98.4\%$



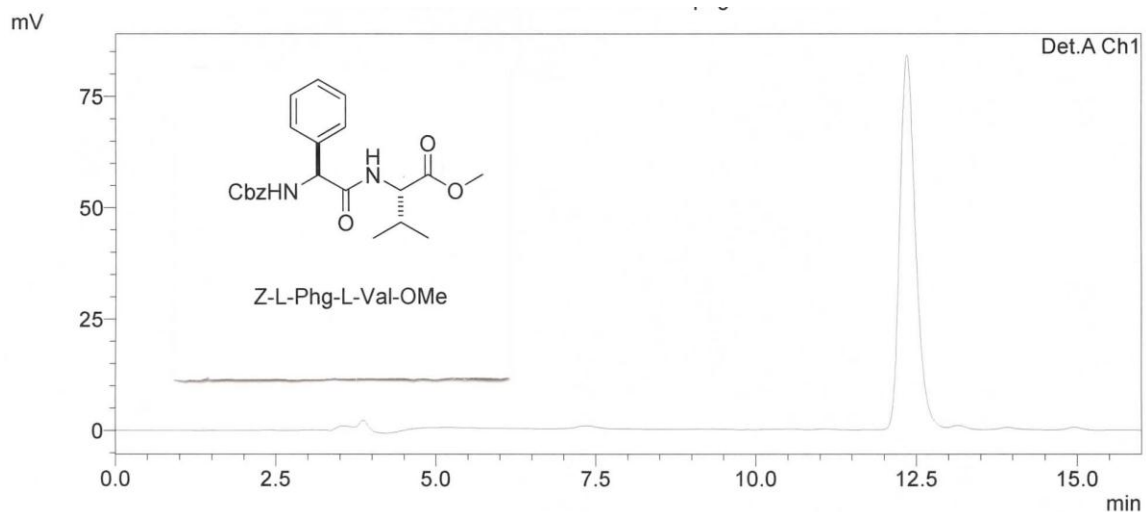

### Boc-L-Tyr-Sar-OMe

Chromatography condition: 40-70% acetonitrile in 0.05% formic acid in 15 min, 0.3 ml/min, 280 nm  
 Result:  $t_R = 3.85$  min,  $de = 97.8\%$

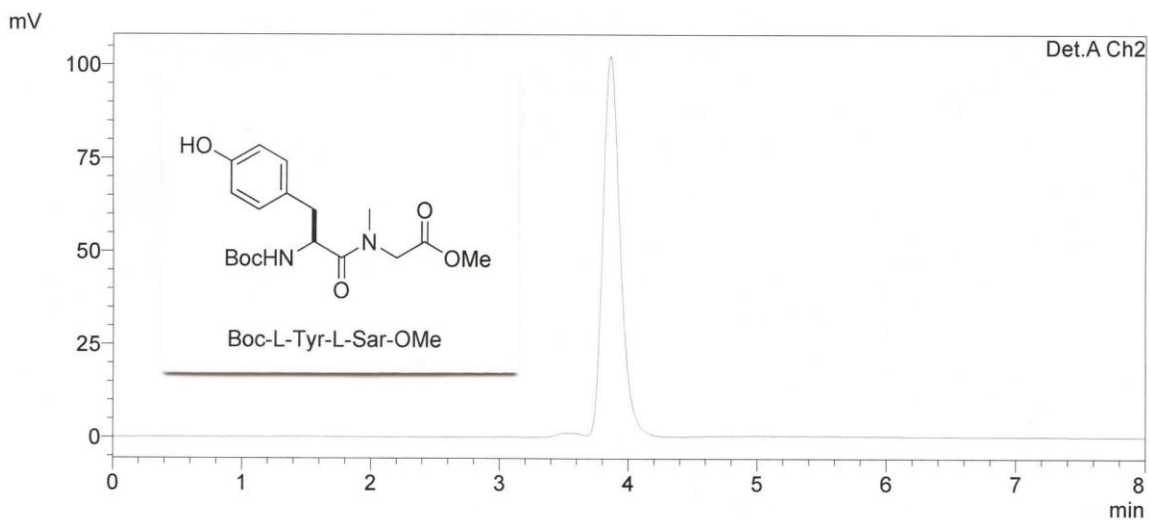

### Fmoc-L-Val-L-Pro-NH<sub>2</sub>

Chromatography condition: 40-70% acetonitrile in 0.05% formic acid in 15 min, 0.3 ml/min, 254 nm  
 Result:  $t_R = 11.90$  min,  $de > 99.8\%$

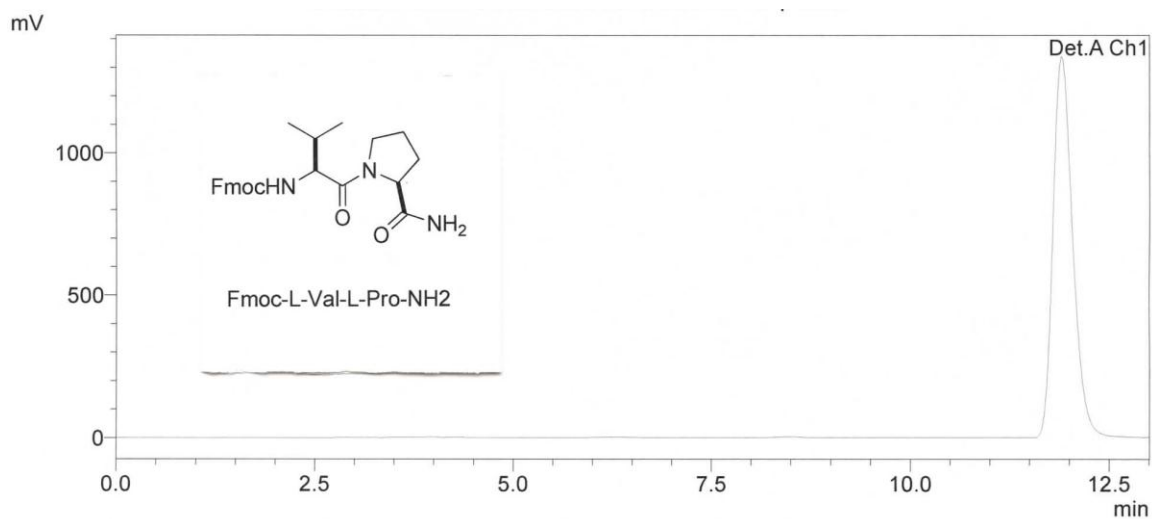

### Fmoc-L-Tyr-L-Ala-OMe

Chromatography condition: 40-70% acetonitrile in 0.05% formic acid in 15 min, 0.3 ml/min, 254 nm  
 Result:  $t_R = 9.47$  min,  $de = 98.6\%$

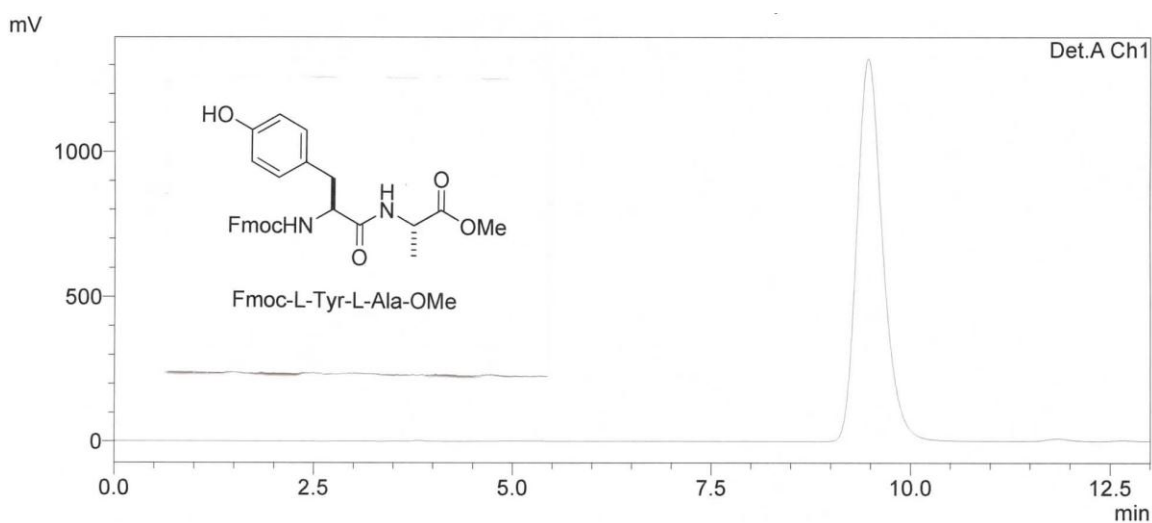

### Boc-L-Tyr-L-Pro-OMe

Chromatography condition: 40-70% acetonitrile in 0.05% formic acid in 15 min, 0.3 ml/min, 280 nm  
 Result:  $t_R = 4.02$  min,  $de > 99.8\%$

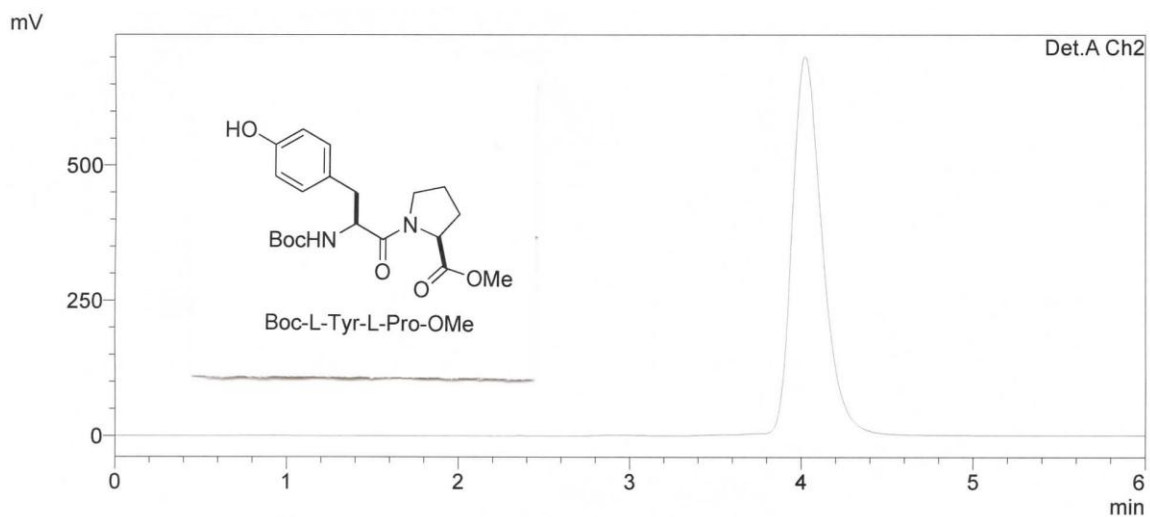

### Boc-L-Tyr-L-Ala-OMe

Chromatography condition: 40-70% acetonitrile in 0.05% formic acid in 15 min, 0.3 ml/min, 254 nm  
 Result:  $t_R = 3.79$  min,  $de = 98.7\%$

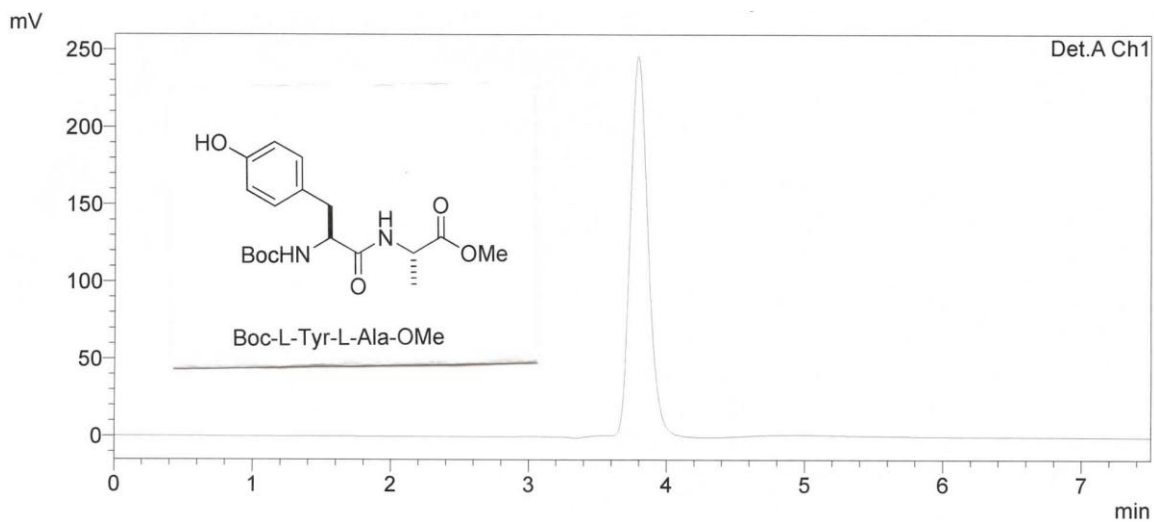

### Boc-L-Ala-L-Phe-D-Ala-OMe

Chromatography condition: 40-70% acetonitrile in 0.05% formic acid in 15 min, 0.3 ml/min, 254 nm  
 Result:  $t_R = 5.26$  min,  $de > 99.8\%$

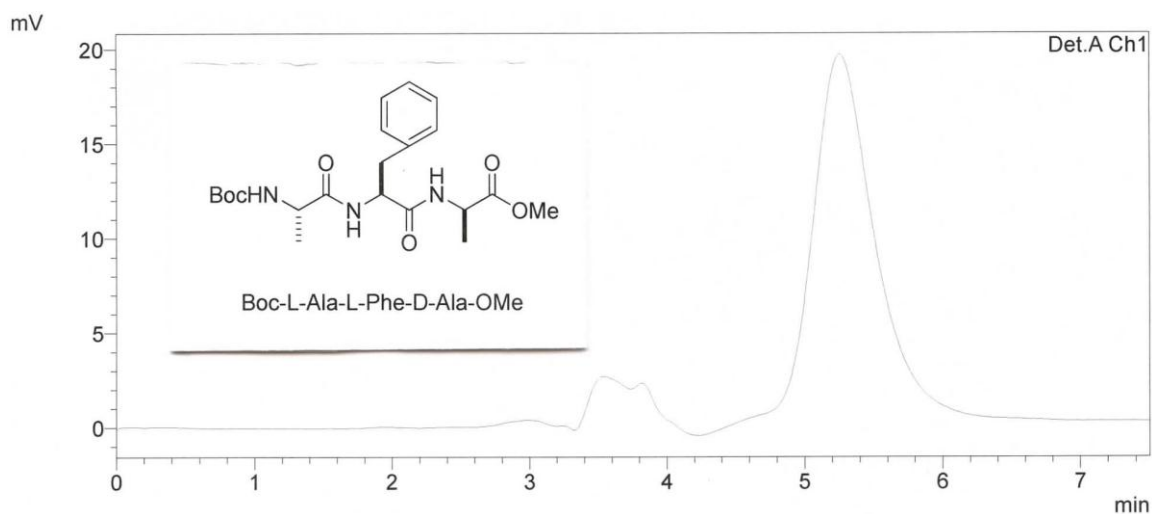

### Ac-L-Tyr-L-Ala-OMe

Chromatography condition: 40-70% acetonitrile in 0.05% formic acid in 15 min, 0.3 ml/min, 280 nm

Result:  $t_R = 3.71$  min,  $de > 99.8\%$

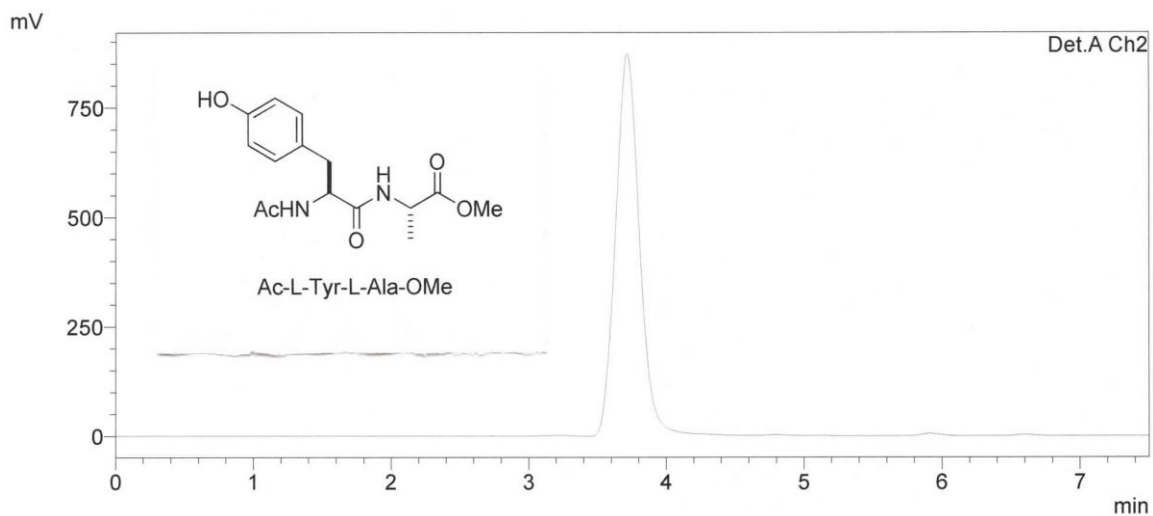

### Ac-L-Phe-L-Ala-OMe

Chromatography condition: 40-70% acetonitrile in 0.05% formic acid in 15 min, 0.3 ml/min, 254 nm

Result:  $t_R = 3.56$  min,  $de = 97.9\%$

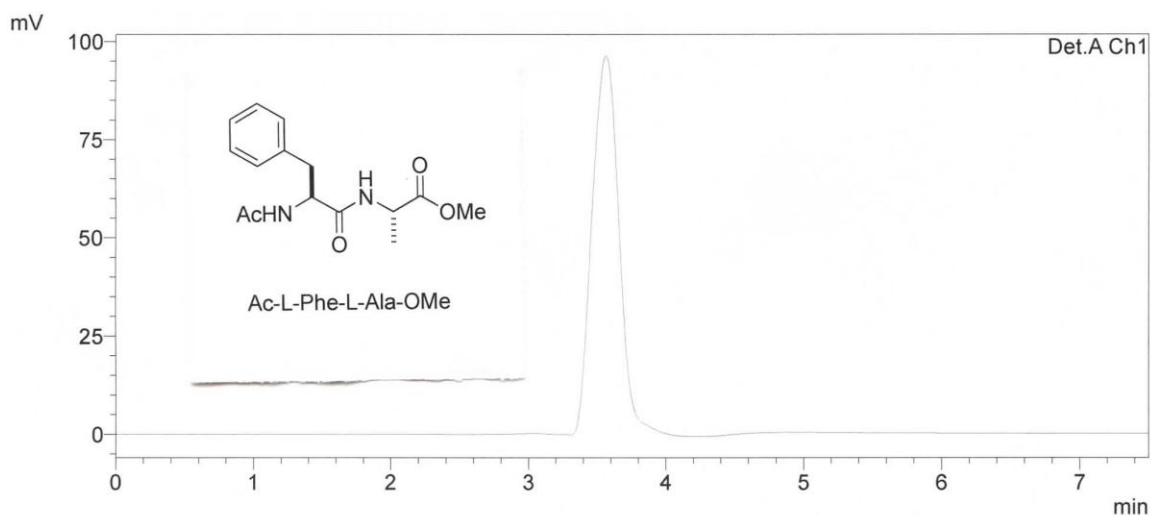

#### Boc-L-Ala-L-Phe-D-Val-OMe

Chromatography condition: 40-70% acetonitrile in 0.05% formic acid in 15 min, 0.3 ml/min, 254 nm  
 Result:  $t_R = 9.38$  min,  $de > 99.8\%$

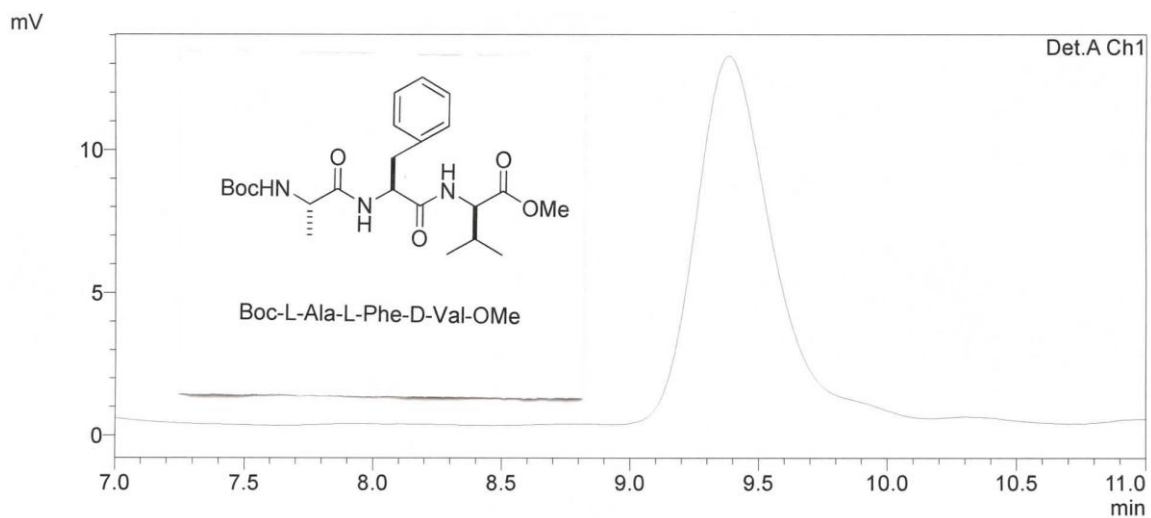

#### Boc-L-Ala-L-Phe-Gly-OMe

Chromatography condition: 40-70% acetonitrile in 0.05% formic acid in 15 min, 0.3 ml/min, 254 nm  
 Result:  $t_R = 9.38$  min,  $de = 96.8\%$

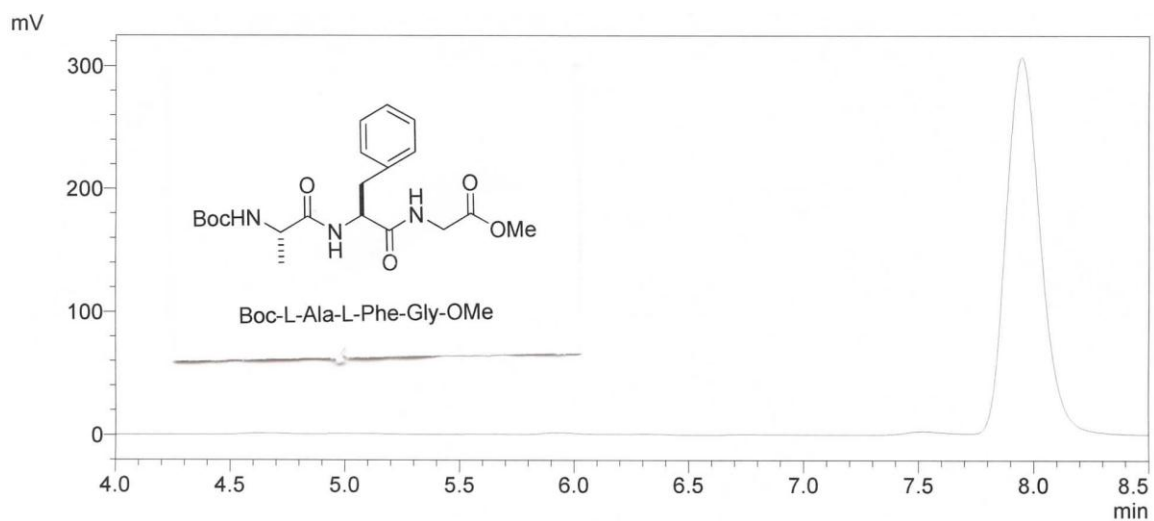

**Boc-L-Tyr-N-Me-L-Ala-OMe**

Chromatography condition: 40-70% acetonitrile in 0.05% formic acid in 15 min, 0.3 ml/min, 280 nm

Result:  $t_R = 7.96$  min,  $de > 99.8\%$

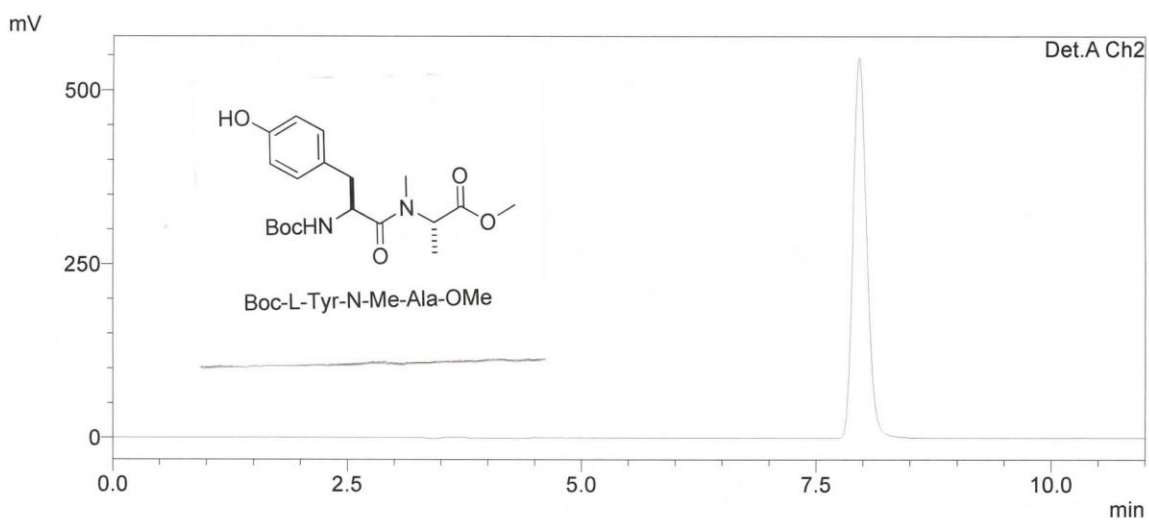

Supplement: NIHMS385331-supplement-SI.pdf [file NIHMS385331-supplement-SI.pdf]
